# Supplementary material
Source: PubMed Central journal article supplement (PMC4672791)
Supplement: pnas.1507380112.sapp.pdf [file pnas.1507380112.sapp.pdf]

## SI Appendix

### Supplementing Results and Discussion

#### Laboratory Experiments

Our laboratory experiments simulated the conditions of the Deepwater Horizon (DWH) deepwater plume very realistically. The dispersant dilutions were 1:60,000 (v/v) in Corexit 9500 ('dispersant-only') treatments and 1:30,000 (v/v) in the chemically enhanced water-accommodated fraction (CEWAF) treatments (*SI Appendix* Fig. S1 and S2). These dilutions resulted in dispersant concentrations (~19 µg/L) that were comparable to concentrations observed in the DWH plume *in situ* (below detection to 12 µg/L) (1). Similarly, the concentration of TPH in the deepwater plume ranged from 2 to ~440 µg/L (2) and in the water-accommodated fraction (WAF) and CEWAF microcosms, the TPH concentration were in a similar range, from 30 to 300 µg/L. We aimed to expose microbial communities to the same amount of dissolved organic carbon (DOC), while varying the composition of the added DOC. To achieve this, we quantified the DOC concentration in the different water-accommodated fractions and added aliquots to obtain comparable DOC concentrations (~150 µM DOC) across treatments, which were similar to the concentration of bulk DOC observed in the deepwater plume (3).

#### Marine oil snow formation

Many hydrocarbon-degrading bacteria produce copious amounts of exopolymeric substances that emulsify oil and increase oil availability to these microorganisms (for general review see Ref. 4). As a result, hydrocarbon addition to a water sample may lead to formation of microbial aggregates, so-called marine "oil" snow, which was documented in the field (5) and in the laboratory (6-9) after the DWH spill. The different types of macroscopical particles formed in these microcosms, resembled the marine snow observed *in situ* during the DWH oil spill.

In the microcosms, the most rapid oil snow formation was observed in CEWAF+nutrients treatments (Fig. S13e). Here, roundish, fractal-looking aggregates were visible after 5 days of incubation and increased significantly in size and number (approaching 2 cm diameter; Fig. S13f, g) during the first 2 weeks of incubation. Thereafter, average aggregate sizes appeared to be unchanged. WAF treatments revealed visible oil snow, that consisted of stringy mucus with attached small particles after about 2 weeks of

incubation (Fig. S13a). These aggregate sizes were much smaller (up to 0.5 cm) than those produced in CEWAF+nutrients with aggregate numbers increasing throughout the experiment (Fig. S13b after 6 weeks of incubation). Compared to CEWAF+nutrients and WAF microcosms, macroscopical particles in the dispersant-only microcosms differed (Fig. S13c). Here, white filaments, ranging in sizes from a few mm up to ~5 cm, were first detected after 10 days and were then visible in most dispersant-only treatments. Similar but smaller filaments as well as small round fluffy aggregates (<0.5 cm; Fig. S13d) were detected after 10 days in CEWAF microcosms.

The formation of micro-aggregates consisting of microbial cells was examined in all treatments using fluorescence microscopy. Fluorescence *in situ* hybridization in combination with catalyzed reporter deposition (CARD-FISH) revealed, that microbial communities grown in CEWAF+nutrients treatments were dominated by Bacteria (green; Fig. S13m-o). Within the Bacteria, different groups contributed to these micro-aggregates, of which the *Gammaproteobacteria* and *Alteromonadales*, including *Colwellia*, were specifically identified using CARD-FISH (red = *Alteromonadales* including *Colwellia*; Fig. S13p-r). These findings support the results of the microbial community composition observed by 16S rRNA gene amplicon sequencing, indicating that *Colwellia* enriched in all dispersant-amended treatments were likely involved in marine oil snow formation when dispersants were present.

### **Nitrogen-containing compounds and phosphate**

Substantial variations in the inorganic nitrogen-containing compounds were observed throughout the experiment. Nitrite concentrations increased from below detection limit to 0.6  $\mu\text{M}$  (*SI Appendix* Table S1) while nitrate concentrations decreased significantly in the WAF (from 23  $\mu\text{M}$  to 2  $\mu\text{M}$ ;  $p < 0.0001$ ) and dispersant-only (from 23  $\mu\text{M}$  to 14  $\mu\text{M}$ ;  $p = 0.002$ ) microcosms (*SI Appendix* Table S1), implying active nitrate uptake and potentially incomplete denitrification. While denitrification is generally considered to occur under anoxic or suboxic conditions, *Marinobacter hydrocarbonoclasticus* is classified as an aerobic denitrifier and may have denitrified in the presence of oxygen (10) in the WAF treatments. Likewise, *Colwellia psychrerythraea* has the genetic potential to denitrify. Genes for hydrocarbon degradation under nitrate-reducing conditions (*bbs*) as well as genes for denitrification (*narG*, *nirS*, *nirK* and *nosZ*) were observed *in situ* in the DWH deep-water plume (11). The presence of mucus-rich, microbial aggregates could further promote denitrification through formation of anoxic microzones (12). Microbial communities,

especially in WAF treatments, assimilated phosphate but were never phosphate limited (*SI Appendix Table S1*).

### **Validation of deepwater results in oil-polluted surface waters**

To validate the deepwater radiotracer dispersant results, we evaluated rates of hydrocarbon turnover in surface water samples that were impacted by a persistent anthropogenic discharge at the Taylor Energy platform in the Gulf of Mexico. At this site, surface waters exhibited tremendously high concentrations of total petroleum hydrocarbons; TPH, at the source was ~ 38,886 µg/g sample. For this experiment, a transect of oil-contaminated surface water samples was obtained from the Taylor Energy oil platform to the river plume of the Mississippi in the Gulf of Mexico. Four sites were sampled; the source of oil contamination (site 1; 38,886 µg/g sample TPH), the intersection of the oil slick with the Mississippi river plume (site 2; 16,376 µg/g sample TPH) and intermediate sites (site 3; 14 µg/g sample TPH, site 4; 30 µg/g sample TPH) between the source and river.

### **Supplementing Material and Methods**

#### **Sample collection at a natural hydrocarbon seep site**

During *R/V Pelican* cruise PE13-21 (March 7<sup>th</sup> 2013), 160 L of seawater were collected from an oil vent at an active natural hydrocarbon seep (27.3614° N, -90.6018° W, depth = 1178 m) located at Green Canyon block 600 (GC600). The GC600 site hosts one of the most active natural oil seeps in the Gulf of Mexico (13-15). Indigenous pelagic microbial communities at GC600 seep sites are adapted to natural oil input into the sea. For collection of seawater, an instrumented CTD rosette equipped with twelve 10 L Niskin bottles was lowered into the plume using chirp sonar as guidance. After recovery, water samples were transferred into pre-cleaned (HCl-soaked, Milli-Q rinsed and dried) and sample water rinsed (3×) 20 L carboys. Carboys were transported at 4°C to the laboratory at the University of Georgia where the experiment and sampling was conducted in an 8°C cold room. Water was stored for one month at 8°C prior to the experiment.

#### **Water-accommodated fractions**

To produce the WAF, the dispersant-only solution, and CEWAFs, seawater was 0.2 µm-filtered and pasteurized (2 h at 65°C). WAF was prepared with 0.85 L of sterile seawater amended with 0.15 L Louisiana sweet crude oil (Macondo surrogate oil from the Marlin

Platform Dorado provided by BP). Dispersant-only solutions were comprised of 0.85 L of sterile seawater and 0.015 L of Corexit 9500. CEWAFs were prepared with 0.85 L of sterile seawater amended with 0.15 L Macondo surrogate oil and 0.015 L of Corexit 9500. Sterile seawater amended with oil and/or dispersant was mixed at 600 rpm (magnetic stirrer, Fisher Scientific Isotemp; Thermo Fisher Scientific Inc., Waltham, MA, USA) for 48 h at RT in the dark in clean 1 L glass bottles (furnace heat-treated; 500°C for 4 h) with teflon-lined caps (acid-rinsed, Milli-Q rinsed, and dried). The fluid mixture was allowed to settle for 1 h and the aqueous phase was sub-sampled into clean glass bottles (combusted at 500°C for 4 h), avoiding inclusion of the oil or dispersant phases. WAF, CEWAF and dispersant-only solution were prepared 3-5 days before initiation of the experiment, examined for potential cell contamination via DAPI staining, and stored at 4°C until usage. Nutrient treatments were amended with trace metals (1/1000 vol/vol of 1000× trace metal solution; 16) and nutrients (10 µM ammonium chloride, 10 µM potassium nitrate and 1 µM potassium phosphate, final concentrations, respectively). The effective dilution of the dispersant in seawater (dispersant to seawater ratio, v/v) was 1:60,000 in the dispersant only treatment, while the dispersant to seawater ratio was 1:30,000 v/v in the CEWAF (±nutrients) setups.

### **Setup and sampling of microcosms**

Establishment and sampling of microcosms was carried out at 8°C. First, the entire volume (160 L) of seawater was mixed carefully in a clean (soaked in 10% HCl for 24 h, Milli-Q rinsed, and dried) 200 L HDPE-tank and then dispensed into clean, combusted (500°C for 4 h) 2 L glass bottles with teflon-lined caps (acid-rinsed, Milli-Q rinsed, and dried). Next, 0.4 L of sterile WAF, dispersant-only, or CEWAF (±nutrients) was added to 1.4 L seawater. To achieve comparable addition of dissolved organic carbon across treatments, the prepared solutions were diluted with an appropriate volume of sterile seawater (0.2 µm-filtered and pasteurized for 2 h at 65°C). Dispersant was much more soluble in water than oil; to generate 0.4 L of diluted solutions, only 1.56 ml of original dispersant-only solution or 3.26 ml of CEWAF (±nutrients) was added. For WAF, 0.4 L of undiluted WAF was added. The biotic control (no addition) and abiotic control (0.2 µm-filtered and pasteurized for 2 h at 65°C) were prepared contemporaneously and were comprised of 1.4 L seawater plus 0.4 L of sterile seawater (0.2 µm-filtered and pasteurized for 2 h at 65°C).

Microcosms were established in triplicates and maintained at 8°C on a roller table (Fig. S2) in the dark at a rotation speed of 15 rpm. All treatments except CEWAF+nutrients were sampled at five different points:  $T_0$  after 0 days,  $T_1$  after 1 week,  $T_2$  after 2 ½ weeks,



T<sub>3</sub> after 4 weeks and T<sub>4</sub> after 6 weeks. The CEWAF+nutrients treatment was sampled at T<sub>0</sub>, T<sub>1</sub> and T<sub>4</sub> only. Three replicates were sacrificed at each sampling point for WAF, dispersant-only, and CEWAF (±nutrients) microcosms, respectively. For the abiotic and biotic controls, three replicates were sacrificed at T<sub>0</sub> and T<sub>4</sub>. For intermediate time points (T<sub>1</sub> to T<sub>3</sub>) the same biological triplicate bottles were sub-sampled. At each time point, sampling of the microcosms was performed by removing aliquots for each analysis described below in the following order: (DNA, oxygen, pH, salinity, DIC, NH<sub>4</sub>, nutrients [NO<sub>2</sub>/NO<sub>3</sub>, PO<sub>4</sub>, DOC, TDN, TDP], total cell counts, Corexit surfactant, <sup>3</sup>H-leucine incorporation, <sup>14</sup>C-hydrocarbon oxidation, enzyme activities, hydrocarbons, DOM), summarized in Supplementary Table 3 and Supplementary Table 4. Upon sampling, each bottle was gently inverted several times to distribute particles evenly (macroscopically visible particles were disrupted) and subsamples taken for the analysis described below.

### **Total cell counts**

Samples for total cell counts were fixed with 3.7% formaldehyde for 1 h at RT and stored at -20°C. The volume filtered was optimized for each time point and treatment, resulting in 30-100 cells per grid. Counts were performed with an epifluorescence microscope (Olympus BX40) after staining with 4',6-Diamidin-2-phenylindol (DAPI; 1 µg/ml). For each filter, a minimum of 10 grids was randomly counted.

### **CARD-FISH**

*In situ* hybridization with horseradish peroxidase (HRP)-labeled probes followed by fluorescently labeled tyramide signal amplification (catalyzed reporter deposition) was carried out (17) with modifications described previously (18). Hybridized samples were analyzed with an epifluorescence microscope (Axioplan Imager 2; Carl Zeiss, Jena, Germany) and a confocal laser-scanning microscope (LSM 700; Carl Zeiss, Jena, Germany). Dual CARD-FISH hybridization was applied using two different tyramides (Alexa488, Alexa594) (18). Probes (biomers.net; Ulm, Germany), coverage, and formamide concentrations are given in Supplementary Table 5 (19-22).

### **Extraction of genomic DNA**

DNA was extracted according to (23) with the following modifications. Cut sterivex filters were placed in 2 ml tubes. 1.8 ml extraction buffer was added to the filter strips and the tube was vortexed for 2 min at high speed before freeze-thaw cycles. Then, 60 µl Sodium

dodecyl sulfate (SDS; 20%), 20  $\mu$ l proteinase K (10 mg/ml) and 200  $\mu$ l lysozyme (50 mg/ml) were added to each sample. Samples were incubated, centrifuged and re-extracted according to (23). An equal volume of phenol-chloroform-isoamyl alcohol (25:24:1) was added to each tube of supernatant, the tubes were mixed gently and centrifuged at room temperature (3,000 $\times$  g; 10 min). DNA was precipitated overnight at room temperature by addition of 0.6 $\times$  volume of isopropanol to the aqueous phase. The precipitated DNA was centrifuged at room temperature (13,000 $\times$  g; 45 min) and the supernatant was replaced with 1 ml of 70% cold ethanol. After a final centrifugation (13,000 $\times$  g; 30 min), the ethanol was removed and the DNA was dried for 15 min in a laminar flow hood. Genomic DNA was resuspended in 60  $\mu$ l of TE buffer (23) and stored at -80°C.

### **PCR and 16S rRNA gene amplicon sequencing**

We sequenced the 16S rRNA V4-V5 regions on the Illumina MiSeq platform. The 16S V4 and V5 primer information is located in <http://1.usa.gov/1wrFncs>. We amplified samples in triplicate 33  $\mu$ L reactions, each composed of 3.3 U Platinum HiFi Taq Polymerase (Invitrogen), 0.2 mM each Purepeak dNTPs (Thermo Fisher Scientific), 3 mM Mg<sup>2+</sup>, 1 $\times$  HiFi Buffer, 0.3  $\mu$ M each fusion primer, and up to 5 ng of genomic DNA. Thermocycling conditions were an initial denaturation of 94°C for 3 min, 30 cycles of 94°C 30 sec, 57°C 45 sec, and 72°C 1 min, and a final extension at 72°C for 2 min. Triplicate reactions were pooled, visualized on the Caliper LabChip 5K assay (Perkin Elmer), purified with Agencourt AMPure XP beads (Beckman Coulter), and quantitated with a Picogreen assay (Invitrogen). Samples were pooled in equimolar concentration, quantitated (KAPA Biosystems), and sequenced using a 500 cycle V2 chemistry kit on an Illumina MiSeq at the Marine Biological Laboratory in Woods Hole, Massachusetts (Bioproject accession PRJNA253405).

### **Quality filtering and clustering of the sequences**

Samples were demultiplexed on the instrument and using custom Python scripts (<https://github.com/meren/illumina-utils>). We retained pairs that merged with 3 or fewer mismatches with the higher quality base recovered. We discarded de novo and reference chimeric reads based on the SILVA GOLD database, and clustered OTUs at 97% similarity using UCLUST. We used GAST against a curated SILVA database version 108 for taxonomy assignment (24, 25). We used the ARB software package (26) with the database SSURef111 from ARB SILVA (24) for phylogenetic analysis. Phylogenetic trees of 16S rRNA gene sequences were calculated by the distance-based neighbor-joining method.

## Oligotyping analysis

Sequences from OTUs assigned to *Marinobacter* (309 OTUs), *Oceaniserpentilla* (231), *Cycloclasticus* (311), and *Colwellia* (600) were oligotyped. (27) We incorporated components from previous oligotyping of *Oceaniserpentilla*, *Cycloclasticus*, and *Colwellia* (3), to separate oligotypes here. For *Marinobacter*, we oligotyped de novo. All sequences within the taxon of interest were aligned to full-length 16S rRNA gene sequences of the same taxon in the Greengenes database, and were trimmed to consistent start and end positions. Oligotypes were retained: if they appeared in 3 samples in which the taxon was observed, if the oligotype had 2 or more sequences across all samples, if the oligotype was at least 0.1% of all sequences in that taxon in a sample, and if the most abundant unique sequence in the oligotype was at least 0.05% of all sequences in that taxon. These filters assured exclusion of oligotypes from PCR, sequencing, or misalignment errors.

For *Marinobacter*, 227,231 sequences resolved into 2,731 oligotypes using 17 high entropy positions; after filtering, 24 oligotypes representing 206,284 (89.6%) sequences remained. These oligotypes had over 99% identity and 100% coverage to entries in NCBI's nr/nt database.

For *Oceaniserpentilla*, 278,765 sequences were categorized into 30 oligotypes representing 250,262 (89.8%) sequences after filtering. In the overlap between this study's data and the previous oligotyping (3), 3 high-entropy positions were mutual to both oligotyping efforts. These oligotypes had over 99% identity and 100% coverage to entries in NCBI's nr/nt database.

For *Colwellia*, 356,354 sequences resolved into 24 oligotypes representing 316,206 (88.7%) sequences after filtering. Two high-entropy positions from the previous oligotyping were also used in this effort. These oligotypes had over 99% identity and 100% coverage to entries in NCBI's nr/nt database.

For *Cycloclasticus*, 328,913 sequences resolved into 31 oligotypes representing 298,008 (90.6% of original input) sequences. Four high-entropy positions carried over from the earlier study. These oligotypes had over 98% identity and 100% coverage to entries in NCBI's nr/nt database.

## DOC, DIC and nutrient analysis

Ammonium ( $\text{NH}_4^+$ ) samples were filtered (0.2  $\mu\text{m}$ ), stored at 4°C, and analyzed after 1-2 days using the indo-phenol colorimetric method (28). Nutrient samples ( $\text{NO}_x^-$  = nitrate ( $\text{NO}_3^-$ ) + nitrite ( $\text{NO}_2^-$ ),  $\text{NO}_2^-$ , phosphate ( $\text{HPO}_4^{3-}$ )), dissolved organic carbon (DOC), and

total dissolved nitrogen (TDN) were collected, 0.2  $\mu\text{m}$ -filtered, stored frozen, and analyzed as described previously (29). Dissolved inorganic carbon (DIC) samples were 0.2  $\mu\text{m}$ -filtered, injected with syringes into He-purged headspace vials, which were capped with rubber septa and crimp sealed prior to sampling. Overpressure was released with a second syringe while injecting the sample. Dissolved inorganic carbon was quantified using gas chromatography (methanizer followed by flame ionization detection). Dissolved organic nitrogen (DON) was calculated as  $\text{DON} = \text{total dissolved nitrogen (TDN)} - \text{NO}_x^- + \text{NH}_4^+$ .

### **Hydrocarbon analysis using GC-MS**

To determine hydrocarbon concentrations, 200 ml of hexane:dichloromethane (1:1, v/v) was added to a pre-cleaned separation funnel containing 500 ml sample and extracted by vigorous shaking for ~10 min. The organic phase was removed and the aqueous phase re-extracted twice. Combined extracts were first concentrated in a RapidVap (Caliper) to about 5 ml, then further to 1 ml using a stream of high purity nitrogen. Hydrocarbons (*n*-alkanes, naphthalene, phenanthrene) were identified and quantified using a Gas Chromatography/Mass Selective Detector (GC/MSD; Agilent 7890GC/5975MSD) as described previously (30). Briefly, a capillary column coated with DB-5 (J & W Scientific, 30 m x 0.25 mm, 0.25  $\mu\text{m}$  film thickness) was used and helium was the carrier gas. Compound identification was based on individual mass spectra and retention times in comparison to library data and to authentic standards that were injected and analyzed under the same conditions. Compound quantification was made by calibration curves of external standards: *n*-octadecane (for  $< C_{20}$  *n*-alkanes), *n*-octacosane (for  $\geq C_{21}$  *n*-alkanes), phenanthrene (for naphthalene and phenanthrene). A procedural blank was run in sequence and no significant background interferences were noted. TPH were quantified as resolved peaks plus UCM, minus resolved peaks not found in the Marlin crude oil such as LMW fatty acids.

### **Excitation – Emission Spectra**

A Perkin Elmer LS50 spectrofluorometer was used to measure the excitation emission matrix spectroscopic analysis (EEMS) of the total hydrocarbon extracts using a pre-cleaned quartz cuvette. Spectra were recorded by scanning emission wavelengths from 300-400 nm for each excitation wavelength from 200-240 nm at 5-nm increments. The excitation-emission wavelengths were selected based on the EEMS spectra of a Louisiana sweet crude oil standard (Macondo surrogate oil) and of a naphthalene standard. The spectra of

the oil and naphthalene were obtained by scanning emission wavelengths from 250-550 nm for each excitation wavelength from 200-500 nm at 5-nm increments. Estimates of total oil equivalents and naphthalene content were based on the EEMs maximum intensity peak measured at the optimal excitation-emission wavelength combination for oil and naphthalene standards, respectively.

### **Dissolved organic matter analysis**

Aliquots of each bottle (ca. 200 ml) were filtered (pre-combusted Whatman GF/F) and the filtrates were acidified to pH 2 with HCl. Dissolved organic matter (DOM) was solid phase extracted (SPE) (31) using PPL cartridges (Agilent Bond Elut, 200 mg) and eluted with methanol. Extraction efficiencies (based on organic carbon yield) were 20-30% in the dispersant-amended treatments and 65-70%, in the oil-only and seawater-only treatments. The SPE-DOM molecular composition was analyzed using a 15 Tesla Solarix Fourier-transform ion cyclotron resonance mass spectrometer (FT-ICR-MS) (Bruker Daltonics) with an electrospray ionization (ESI) source run in negative mode (32). Negative ionization was chosen because DOSS and EHSS are anionic compounds that are readily analyzable in this mode (1, 33, 34). The detected compounds had molecular masses <850 Da. Instrument settings and DOM molecular formulae assignment procedures were described previously (32). Molecular formulae were unambiguously assigned to peaks with signal-to-noise ratios >4 as described by Koch et al. (35) with a mass tolerance <0.5 ppm and using stable carbon isotope confirmation. Normalized peak heights (relative to the sum of peak heights of all identified molecular formulae per sample) were used to assess changes in the DOM molecular composition in the incubations with changes being considered significant if  $p < 0.01$  (two-sided paired Student's t-test, comparing triplicates,  $n = 3$ ) of  $T_0$  with  $T_4$ . For statistical testing we only considered the common 1205 molecular formulae that were detected in all  $T_0$  samples of the oil-only and oil-dispersants treatments. Applying this approach to the abiotic control samples proved that it was robust as no significant changes in the molecular DOM composition were detected when comparing  $T_0$  to  $T_4$ . A second approach was applied to address how dispersant amendment changed the relative proportion of S-containing compounds in the DOM. In this analysis, a compound was considered to be produced (degraded) when it was absent (present) at the initial time point ( $T_0$ ) but present (absent) after six weeks ( $T_4$ ) of incubation. Molecular formulae were considered only when they were detected in at least two of the three replicates of the treatments.

## Corexit analysis

Liquid chromatography tandem mass spectrometry (LC–MS/MS) enabled quantitative detection of distinct dispersant compounds: the anionic surfactant DOSS and the nonionic surfactants Span 80, Tween 80, Tween 85, as well as,  $\alpha/\beta$ -ethyhexylsulfosuccinate (EHSS), the hydrolysis products of DOSS (34, 36). Microcosm chambers were sampled and immediately diluted to 75 percent with isopropanol (seawater:isopropanol, 75:25), and stored at  $-20^{\circ}\text{C}$ . Bottles were then decanted and rinsed with 20 ml MeOH. The MeOH rinsate was collected and saved (at  $-20^{\circ}\text{C}$ ) for Corexit surfactant analysis. Samples were shipped overnight on dry ice to Oregon State University and stored at  $-20^{\circ}\text{C}$  until analysis. Samples were diluted 0 to 100-fold and quantitative analysis of the surfactant components of Corexit was performed (34) with minor modification.

Calibration curves consisted of at least 5 standards and required a correlation coefficient of 0.99 or greater to be used for quantification. All calibration curves were  $1/\times$  weighted, and standards whose calculated concentrations were beyond 20% of the intended concentration were removed from the calibration curve calculation. Calibration curves spanned from the lower limit of quantification (LLOQ) to the upper limit of quantification (ULOQ): for DOSS ( $0.2\text{-}25\ \mu\text{g L}^{-1}$ ),  $\alpha/\beta$ -EHSS ( $0.2\text{-}23\ \mu\text{g L}^{-1}$ ), Span 80 ( $60\text{-}300\ \mu\text{g L}^{-1}$ ), Tween 80 ( $60\text{-}300\ \mu\text{g L}^{-1}$ ), and Tween 85 ( $60\text{-}300\ \mu\text{g L}^{-1}$ ). Each calibration standard was spiked to give a final concentration of  $500\ \text{ng L}^{-1}\ ^{13}\text{C}_4$ -DOSS and  $500\ \text{ng L}^{-1}\ ^{13}\text{C}_4$ - $\alpha$ -EHSS. Blank and check standards (34) were used for quality control purposes. Standards for DOSS and EHSS fell within 20% of the spiked concentration and the non-ionic Corexit surfactants fell within 35% of the spiked concentration. All blank QC fell below the limit of detection.

A robust whole method error term (37) was calculated using the following method: 250 ml of instant ocean IPA was spiked with standards to yield a concentration of  $500\ \text{ng L}^{-1}$  DOSS and EHSS and  $80,000\ \text{ng L}^{-1}$  non-ionics. This solution was divided between 50 ml aliquots and stored at  $-20^{\circ}\text{C}$  until analysis. These aliquots were analyzed (5 ml,  $n = 4$ ) on 4 different days to calculate an accuracy term that accounts for in day and between day variability. On each day of analysis, standards (all analytes) and internal standards (ionics only) were made fresh and used to calibrate the instrument. The whole method error was: DOSS ( $\pm 7.3\%$ ), EHSS ( $\pm 11.2\%$ ), Tween 80 ( $\pm 24.0\%$ ), Tween 85 ( $\pm 23.3\%$ ), and Span 80 ( $\pm 76\%$ ).

### **<sup>3</sup>H-leucine incorporation**

Rates of bacterial protein synthesis were determined using <sup>3</sup>H-leucine incorporation (38) in the triplicate samples for each treatment. For each triplicate series, a killed control (mixed sample of triplicates) and a replicate (n = 2; random sample) were analyzed. Subsamples were stored overnight at 4°C before the <sup>3</sup>H-leucine incorporation assays were conducted at 8°C. A final concentration of 6-9 nmol L<sup>-1</sup> (T<sub>0</sub>-T<sub>3</sub>: 6 nmol L<sup>-1</sup>, T<sub>4</sub>: 9 nmol L<sup>-1</sup>) <sup>3</sup>H-leucine (specific activity of 60 Ci mmol<sup>-1</sup>) was achieved. 1.5 ml of sample were incubated for 1-6 h (T<sub>0</sub>: 6 h, T<sub>1</sub>: 1.5 h, T<sub>2</sub>-T<sub>4</sub>: 1 h) at 8°C. Killed controls were amended with trichloroacetic acid (TCA; final concentration of 6.25% v/v TCA) prior to incubations and the incubations were terminated using the same procedure (final concentration of 6.25% v/v TCA). Subsequently, the samples were washed with 5% w/v TCA and then with 80% ethanol, according to Ref. 39 with minor modifications: centrifugation of 30 min for first pelleting and the pellet was not resuspended afterwards. Finally, the dried pellets were resuspended in 1 ml Scintillation Cocktail (Scintisafe Gel; Fisher) and analyzed immediately using a Beckman LS 6500 multi-purpose scintillation counter. Rates of bacterial production were calculated according to Kirchman (39).

### **<sup>14</sup>C-hydrocarbon oxidation rates**

We selected two hydrocarbon classes, alkanes and PAHs, for direct determination of biodegradation rates because alkanes and PAHs are chemically distinct and PAHs are inherently toxic and mutagenic (40). Rates of <sup>14</sup>C-hydrocarbon oxidation were determined in triplicates. For each series, a killed control (mixed sample of triplicates) and a replicate (n = 2; random sample) were analyzed. Subsamples were stored overnight at 4°C before the <sup>14</sup>C-hydrocarbon oxidation assays were conducted. 8 ml of sample was incubated in headspace free scintillation vials with teflon-coated stoppers and caps. [1-<sup>14</sup>C]-hexadecane (American Radiolabel Chemicals; ARC) and [1-<sup>14</sup>C]-naphthalene (ARC) were diluted in ethanol. Hexane was evaporated from the [1-<sup>14</sup>C]-hexadecane prior to ethanol dissolution using a slow argon stream. Tracer volumes per 8 ml samples were 10-20 µl to prevent ethanol inhibition (final ethanol concentration ≤ 0.2%; units of radioactivity per sample = 1.4×10<sup>3</sup> Bq). Killed controls were transferred to a 15 ml tube and amended with 1 M NaOH solution (final concentration of 0.2 mM NaOH) prior to tracer addition and activity was halted with the same procedure (final concentration of 0.2 mM NaOH). Samples were incubated for 12-24 h (T<sub>0</sub> and T<sub>1</sub>: 24 h, T<sub>2</sub>-T<sub>4</sub>: 12 h) at 8°C.

To remove tracer [1-<sup>14</sup>C]-hydrocarbons, 1 g of activated carbon (Sigma Aldrich) was added to the samples in the 15 ml tubes and the samples were mixed (shaker table, 100 rpm) horizontally for 5 h to allow absorption of the hydrocarbons to the activated carbon. Afterwards, microbial [1-<sup>14</sup>C]-hydrocarbon degradation was measured via the accumulation of oxidation product (<sup>14</sup>C-DIC), which was released by acid digestion: samples and activated carbon were transferred to a 250-ml flask. Sample tubes were rinsed with Milli-Q to remove residual sample and activated carbon. The rinse water was transferred to the flask of the appropriate sample, respectively. Each flask was sealed with a black rubber stopper fitted with a holder for 7-ml glass scintillation vials. Scintillation vials contained ¼ of a glass fiber filter (Whatman) and 2 ml of Carbo-Sorb (Perkin Elmer). Samples (~50 ml including rinse water) were acidified to pH 1 by the addition of 5 ml phosphoric acid (H<sub>3</sub>PO<sub>4</sub> ≥85 wt. % in H<sub>2</sub>O). Then, samples were shaken at room temperature for 6 h (100 rpm) to release and trap <sup>14</sup>C-CO<sub>2</sub>. After sample distillation, 4.5 ml of Scintillation Cocktail (Scintisafe Gel; Fisher) was added to the scintillation vial and radioactivity was quantified using a Beckman 6500 liquid scintillation counter. The rate of hydrocarbon oxidation was calculated using: hydrocarbon oxidation rate = rate constant (per hour) × µg/L concentration × fractionation factor.

### **Enzyme activities**

Potential enzyme activities were measured using fluorogenic substrate analogs for lipase (4-MUF-butyrate; final concentration: 100 µM), β-glucosidase (4-MUF-β-D-glucopyranoside; 200 µM), and peptidase (L-leucine-MCA hydrochloride; 400 µM; all from Sigma-Aldrich) to determine enzymatic degradation of lipids, carbohydrates, and peptides, respectively (41). Shortly after sampling, water was added to disposable methacrylate cuvettes containing individual fluorogenic substrate analogs at saturation levels (total incubation volume: 3 ml). Fluorescence was measured immediately afterwards in a clean cuvette, containing 1 ml of the water-substrate solution and 1 ml of borate buffer (20 nM; pH 9.2), using a Turner Biosystems TBS-380 fluorometer, with excitation/emission channels set to “UV” (365 nm excitation, 440-470 nm emission). All cuvettes were incubated in the dark at 8°C, and fluorescence was measured two more times over the course of 24 hours. Fluorescence changes were calibrated using standard solutions of 4-methylumbelliferone and 4-methylcoumarin in pasteurized control water, and used to calculate hydrolysis rates (expressed in nmol L<sup>-1</sup> h<sup>-1</sup>). Changes in fluorescence measured in abiotic controls were always minimal for β-glucosidase and peptidase. Abiotic hydrolysis of MUF-butyrate in AC-



bottles was detectable at every sampling time, but was considerably lower compared to the live treatments.

### **Transparent exopolymeric particle analysis and documentation of macroscopic particles**

Transparent exopolymeric particles (TEPs) were quantified colorimetrically in 3 replicates per bottle by filtration onto 0.4  $\mu\text{m}$  PC filters (Poretics) and subsequent staining with Alcian Blue (42). TEP was only measured in bottles without Corexit, because Corexit interferes with the stain. Values in samples with oil were corrected for interference from oil. The dye solution was calibrated using Gum Xanthan and TEP are expressed as Gum Xanthan equivalents per liter ( $\text{GXeq L}^{-1}$ ). TEP determinations are semi-quantitative as the chemical composition of TEP varies, is complex and unknown, and variation between replicate measurements are high. The methodological coefficient of variation (standard deviation divided by average) between replicate measurements within each container in our experiments was usually  $\leq 10\%$  and was always  $\leq 20\%$ . Standard deviations were calculated from replicate containers.

Macroscopically visible particles were monitored every 2-3 days. Pictures of marine snow formations were taken with an SLR camera (Canon 500 EOS equipped with a 18-55 mm lens).

### **Statistical analysis**

Correspondence analysis (CA), a multivariate ordination method, was used to determine whether the observed patterns of microbial taxa were associated with specific treatments. The ordination was performed using the vegan package (43) within the R statistical platform (44). Distances between sample and species points in a CA plot indicate the probability of the occurrence of the species in the respective sample (e.g. Ref. 45). CA is useful if the analyzed species show an unimodal relationship within the samples (46).

We evaluated relationships between measured microbiological and geochemical parameters, microbial activity, and oligotype abundances using R (44), and packages vegan (43) and qvalue (47). Spearman's rank correlation coefficient  $\rho$  was calculated for each oligotype distribution and environmental parameter. Storey's FDR correction for multiple tests at  $q < 0.01$  was used to retain significant ( $p < 0.02$ ) correlations. Student's t-test was used to determine the significance of the differences of cell counts, nitrate,

bacterial production as well as hexadecane and naphthalene oxidation rates between the different treatments.

### **Hydrocarbon turnover in oil-contaminated surface seawater samples**

Surface seawater samples were collected on 9 Oct 2014 near the site where the Taylor Energy Production Platform sank in 2004 following Hurricane Ivan. A chartered vessel was used to sample at four sites: site 1, near the source of the leaking sunken platform, 28.9371° N, 88.982° W; site 2, at confluence of oil slick and Mississippi river plume (i.e., the mousse site; 28.91834° N, 89.0184° W) and site 3 (28.93319° N, 88.9969° W) and site 4 (28.93243° N, 89.0093° W), which were in between the source and plume confluence sites. Water samples were collected in 10 L cubitainers and kept at 4°C until arrival in the laboratory. From sites 2 and 4, sufficient water was available to test effects of dispersant addition on hydrocarbon turnover; at sites 1 and 3, we were only able to determine biodegradation rates in the absence of dispersant. For the dispersant amendments, Corexit 9500 was diluted 1:10 into filter-sterilized seawater. Then 100 µL of the dispersant-seawater mixture was added to 1 L of surface seawater into a 2 L combusted glass bottle (with teflon lined cap), leading to a final concentration of 10 µL Corexit per 1 L seawater, or a 1 in 100,000 dilution. Samples were incubated for 24 hours at 20°C (or RT). Then, hydrocarbon turnover was determined applying the improved radiotracer assays (see above). Hydrocarbons were extracted and concentrations determined as described in the hydrocarbon analysis section (GC-MS).

### **References**

1. Kujawinski EB, et al. (2011) Fate of dispersants associated with the Deepwater Horizon oil spill. *Environ Sci Technol* 45(4):1298-1306.
2. Wade TL, et al. (2013) Analyses of Water Samples From the Deepwater Horizon Oil Spill: Documentation of the Subsurface Plume. *Monitoring and Modeling the Deepwater Horizon Oil Spill: A Record-Breaking Enterprise*, (American Geophysical Union, Washington, DC), pp 77-82.
3. Kleindienst S, et al. (2015) Diverse, rare microbial taxa responded to the Deepwater Horizon deep-sea hydrocarbon plume. *ISME J*:doi:10.1038/ismej.2015.1121.
4. Head IM, Jones DM, Roling WFM (2006) Marine microorganisms make a meal of oil. *Nat Rev Micro* 4(3):173-182.

5. Passow U, Ziervogel K, Asper V, Diercks A (2012) Marine snow formation in the aftermath of the Deepwater Horizon oil spill in the Gulf of Mexico. *Environ Res Lett* 7(3):035301.
6. Gutierrez T, et al. (2013) Role of bacterial exopolysaccharides (EPS) in the fate of the oil released during the Deepwater Horizon oil spill. *PLoS ONE* 8(6):e67717.
7. Ziervogel K, et al. (2012) Microbial activities and dissolved organic matter dynamics in oil-contaminated surface seawater from the Deepwater Horizon oil spill site. *PLoS ONE* 7(4):e34816.
8. Passow U (in press) Formation of rapidly-sinking, oil-associated marine snow. *Deep-Sea Res Pt II* :doi:10.1016/j.dsr1012.2014.1010.1001.
9. Bælum J, et al. (2012) Deep-sea bacteria enriched by oil and dispersant from the Deepwater Horizon spill. *Environ Microbiol* 14(9):2405-2416.
10. Dell'Acqua S, Pauleta SR, Moura JJ, Moura I (2012) Biochemical characterization of the purple form of *Marinobacter hydrocarbonoclasticus* nitrous oxide reductase. *Philos Trans R Soc Lond B Biol Sci* 367(1593):1204-1212.
11. Lu Z, et al. (2011) Microbial gene functions enriched in the Deepwater Horizon deep-sea oil plume. *ISME J* 6:451-460.
12. Ploug H, Kuehl M, Buchholz-Cleven B, Jorgensen BB (1997) Anoxic aggregates - an ephemeral phenomenon in the pelagic environment? *Aquat Microb Ecol* 13:285-294.
13. Hu L, Yvon-Lewis SA, Kessler JD, MacDonald IR (2012) Methane fluxes to the atmosphere from deepwater hydrocarbon seeps in the northern Gulf of Mexico. *J Geophys Res* 117(C1):C01009.
14. Joye SB, Bowles MW, Samarkin VA, Hunter KS, Niemann H (2010) Biogeochemical signatures and microbial activity of different cold-seep habitats along the Gulf of Mexico deep slope. *Deep-Sea Res Pt II* 57(21–23):1990-2001.
15. Roberts HH, Feng D, Joye SB (2010) Cold-seep carbonates of the middle and lower continental slope, northern Gulf of Mexico. *Deep-Sea Res Pt II* 57(21–23):2040-2054.
16. Widdel F, Bak. F (1992) *Gram-negative mesophilic sulfate-reducing bacteria* (Springer-Verlag, New York).
17. Pernthaler A, Pernthaler J, Amann R (2002) Fluorescence in situ hybridization and catalyzed reporter deposition for the identification of marine bacteria. *Appl Environ Microbiol* 68(6):3094-3101.

18. Kleindienst S, Ramette A, Amann R, Knittel K (2012) Distribution and in situ abundance of sulfate-reducing bacteria in diverse marine hydrocarbon seep sediments. *Environ Microbiol* 14(10):2689-2710.
19. Manz W, Amann R, Ludwig W, Wagner M, Schleifer K-H (1992) Phylogenetic oligodeoxynucleotide probes for the major subclasses of *Proteobacteria*: problems and solutions. *Syst Appl Microbiol* 15(4):593-600.
20. Daims H, Brühl A, Amann R, Schleifer K-H, Wagner M (1999) The domain-specific probe EUB338 is insufficient for the detection of all Bacteria: development and evaluation of a more comprehensive probe set. *Syst Appl Microbiol* 22(3):434-444.
21. Amann RI, et al. (1990) Combination of 16S rRNA-targeted oligonucleotide probes with flow cytometry for analyzing mixed microbial populations. *Appl Environ Microbiol* 56(6):1919-1925.
22. Eilers H, Pernthaler J, Glöckner FO, Amann R (2000) Culturability and in situ abundance of pelagic bacteria from the North Sea. *Appl Environ Microbiol* 66(7):3044-3051.
23. Huber JA, Butterfield DA, Baross JA (2002) Temporal changes in archaeal diversity and chemistry in a Mid-Ocean Ridge seafloor habitat. *Appl Environ Microbiol* 68(4):1585-1594.
24. Pruesse E, et al. (2007) SILVA: a comprehensive online resource for quality checked and aligned ribosomal RNA sequence data compatible with ARB. *Nucl Acids Res* 35:7188-7196.
25. Quast C, et al. (2013) The SILVA ribosomal RNA gene database project: improved data processing and web-based tools. *Nucleic Acids Res* 41(Database issue):D590-596.
26. Ludwig W, et al. (2004) ARB: a software environment for sequence data. *Nucl Acids Res* 32:1363-1371.
27. Eren AM, et al. (2013) Oligotyping: differentiating between closely related microbial taxa using 16S rRNA gene data. *Methods Ecol Evol* 4(12):1111–1119.
28. Solorzano L (1969) Determination of ammonia in natural waters by phenol hypochlorite method. *Limnol Oceanogr* 14:799–801.
29. Joye SB, et al. (2004) The anaerobic oxidation of methane and sulfate reduction in sediments from Gulf of Mexico cold seeps. *Chem Geol* 205(3–4):219-238.

30. Medeiros PM, Bicego MC (2004) Investigation of natural and anthropogenic hydrocarbon inputs in sediments using geochemical markers. I. Santos, SP-Brazil. *Mar Pollut Bull* 49(9–10):761-769.
31. Dittmar T, Koch B, Hertkorn N, Kattner G (2008) A simple and efficient method for the solid-phase extraction of dissolved organic matter (SPE-DOM) from seawater. *Limnol Oceanogr: Methods* 6:230-235.
32. Seidel M, et al. (2014) Biogeochemistry of dissolved organic matter in an anoxic intertidal creek bank. *Geochim Cosmochim Acta* 140(0):418-434.
33. Place B, et al. (2010) A role for analytical chemistry in advancing our understanding of the occurrence, fate, and effects of corexit oil dispersants. *Environ Sci Technol* 44(16):6016-6018.
34. Place BJ, et al. (2014) Trace analysis of surfactants in Corexit oil dispersant formulations and seawater. *Deep-Sea Res Pt II* (0).
35. Koch BP, Dittmar T, Witt M, Kattner G (2007) Fundamentals of molecular formula assignment to ultrahigh resolution mass data of natural organic matter. *Anal Chem* 79(4):1758-1763.
36. Campo P, Venosa AD, Suidan MT (2013) Biodegradability of Corexit 9500 and dispersed South Louisiana crude oil at 5 and 25 degrees C. *Environ Sci Technol* 47(4):1960-1967.
37. Gustavo González A, Ángeles Herrador M (2007) A practical guide to analytical method validation, including measurement uncertainty and accuracy profiles. *TrAC Trends in Analytical Chemistry* 26(3):227-238.
38. Smith DC, Azam F (1992) A simple, economical method for measuring bacterial protein synthesis rates in seawater using <sup>3</sup>H-leucine. *Mar Microb Food Webs* 6(2):107-111.
39. Kirchman DL (2001) Measuring bacterial biomass production and growth rates from leucine incorporation in natural aquatic environments. *Marine microbiology - Methods in microbiology*, ed Paul JH (Academic Press Ltd), Vol 30.
40. Pickering RW (1999) A toxicological review of polycyclic aromatic hydrocarbons. *Journal of Toxicology - Cutaneous and Ocular Toxicology* 18:101–135.
41. Hoppe HG (1983) Significance of exoenzymatic activities in the ecology of brackish water: measurements by means of methylumbelliferyl-substrates. *Marine Ecology-progress Series* 11:299-308.

42. Passow U, Alldredge AL (1995) A dye-binding assay for the spectrophotometric measurement of transparent exopolymer particles (TEP). *Limnol Oceanogr* 40(7):1326-1335.
43. Oksanen J, et al. (2013) Vegan: Community Ecology Package. R package version 2.0-7).
44. R-Core-Team (2012) R: A language and environment for statistical computing (Vienna, Austria).
45. Ramette A (2007) Multivariate analyses in microbial ecology. *FEMS Microbiol Ecol* 62(2):142-160.
46. ter Braak CJF (1985) Correspondence analysis of incidence and abundance data: properties in terms of a unimodal response model. *Biometrics* 41:859-873.
47. Klaus B, Strimmer K (2012) fdrtool: Estimation of (Local) False Discovery Rates and Higher Criticism. R package version 1.2.10.).

## Supplementing Figures and Tables

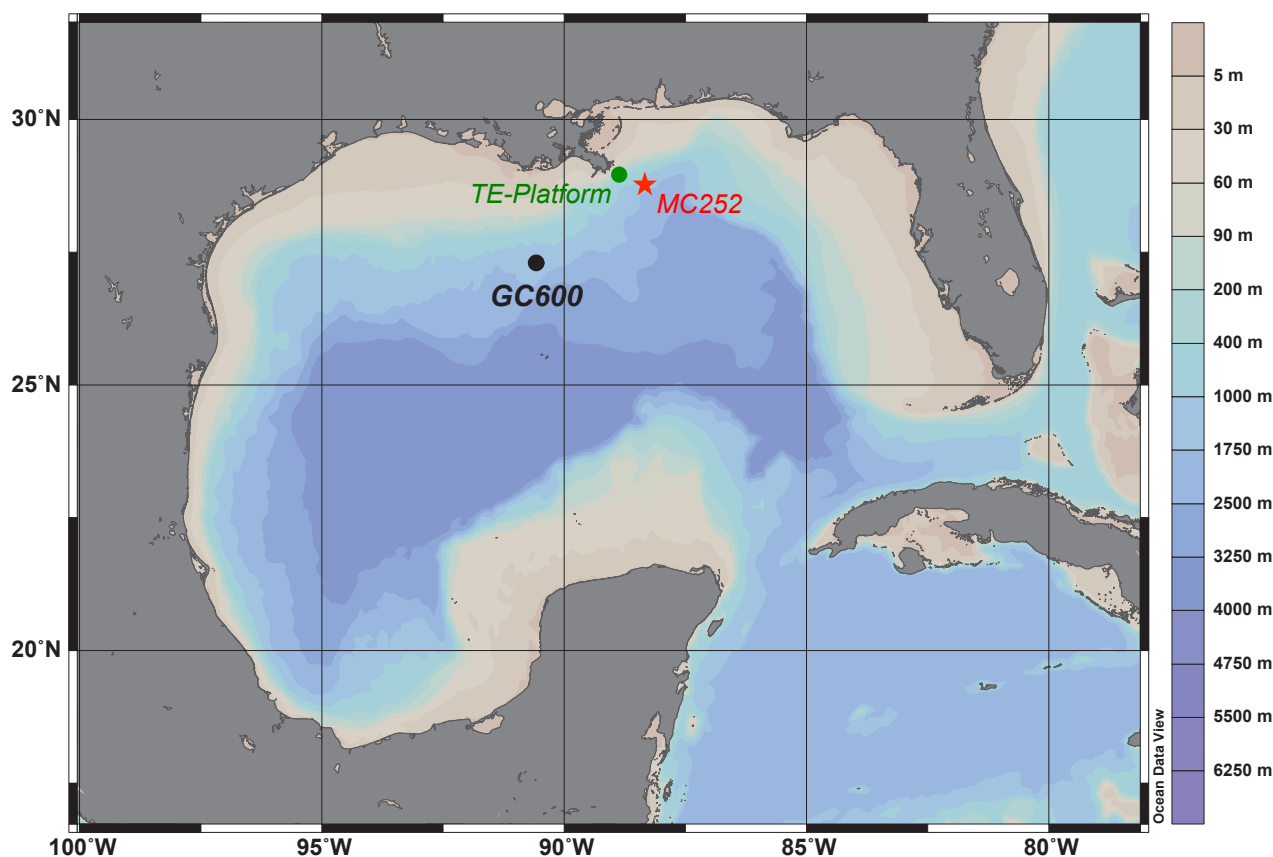

**Fig. S1. Location of sampling sites at GC600 (black circle) and the Taylor Energy platform (green circle).** Green Canyon block 600 (GC600) in the northern Gulf of Mexico is a natural gas and oil seepage. The GC600 area is 260 kilometers to the southwest of the DWH spill site MC252 (red star) and was therefore not directly impacted by the DWH oil spill. Deepwater samples obtained from GC600 represent natural pelagic seep communities including microorganisms with hydrocarbon-degrading abilities and, hence, are perfectly suitable to survey the impact of dispersants on hydrocarbon-degrading microbial populations. Surface seawater samples were obtained from the sunken Taylor Energy platform, which has been discharging hydrocarbons into the Gulf since the platform sank in 2004.

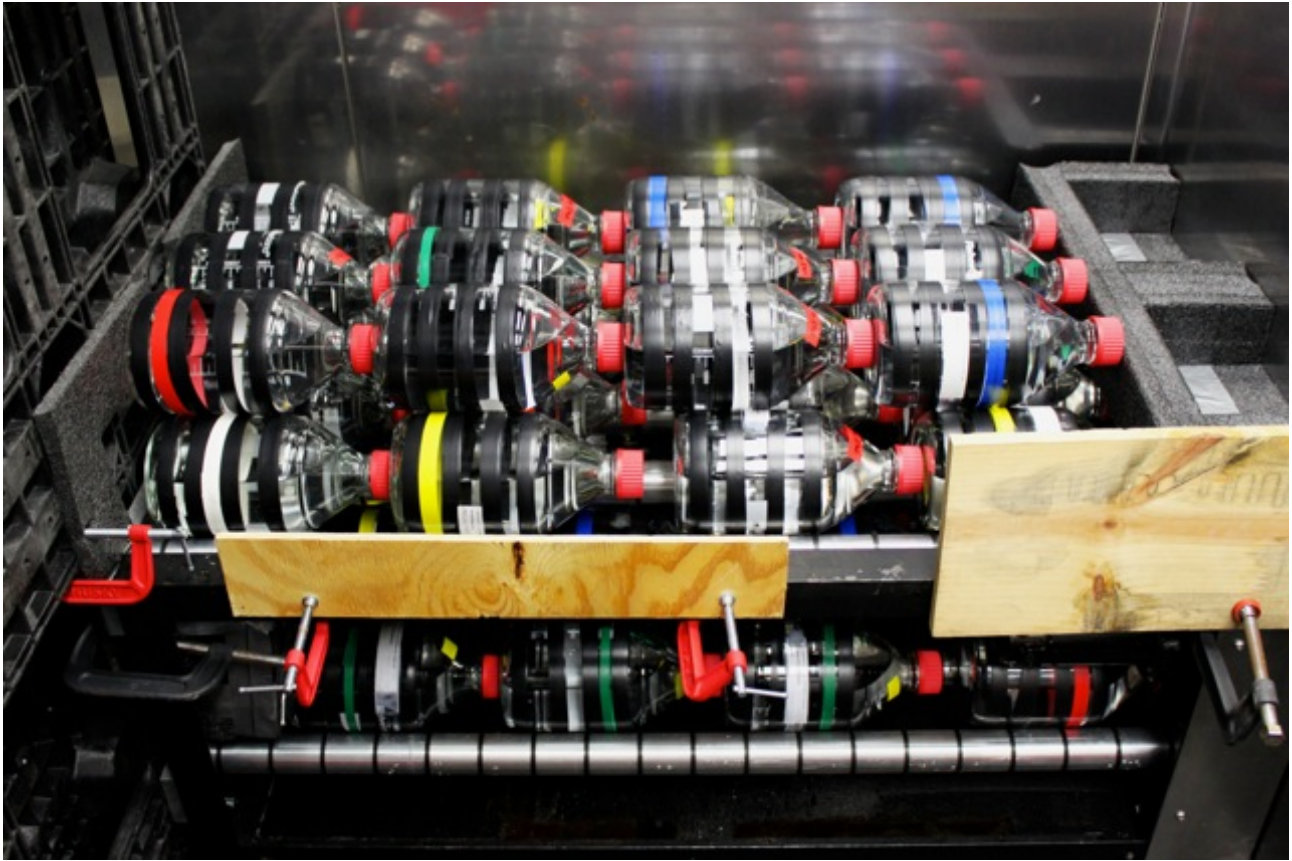

**Fig. S2. Photograph of microcosm with deep-seawater incubated on a roller table.** Before the microcosm setups, 2-L glass bottles were wrapped with teflon tape to assure better rolling abilities. For the time course of the experiment, bottles were stacked in two layers on the two rolling units of the table and permanently rotated at the same speed (15 rpm).



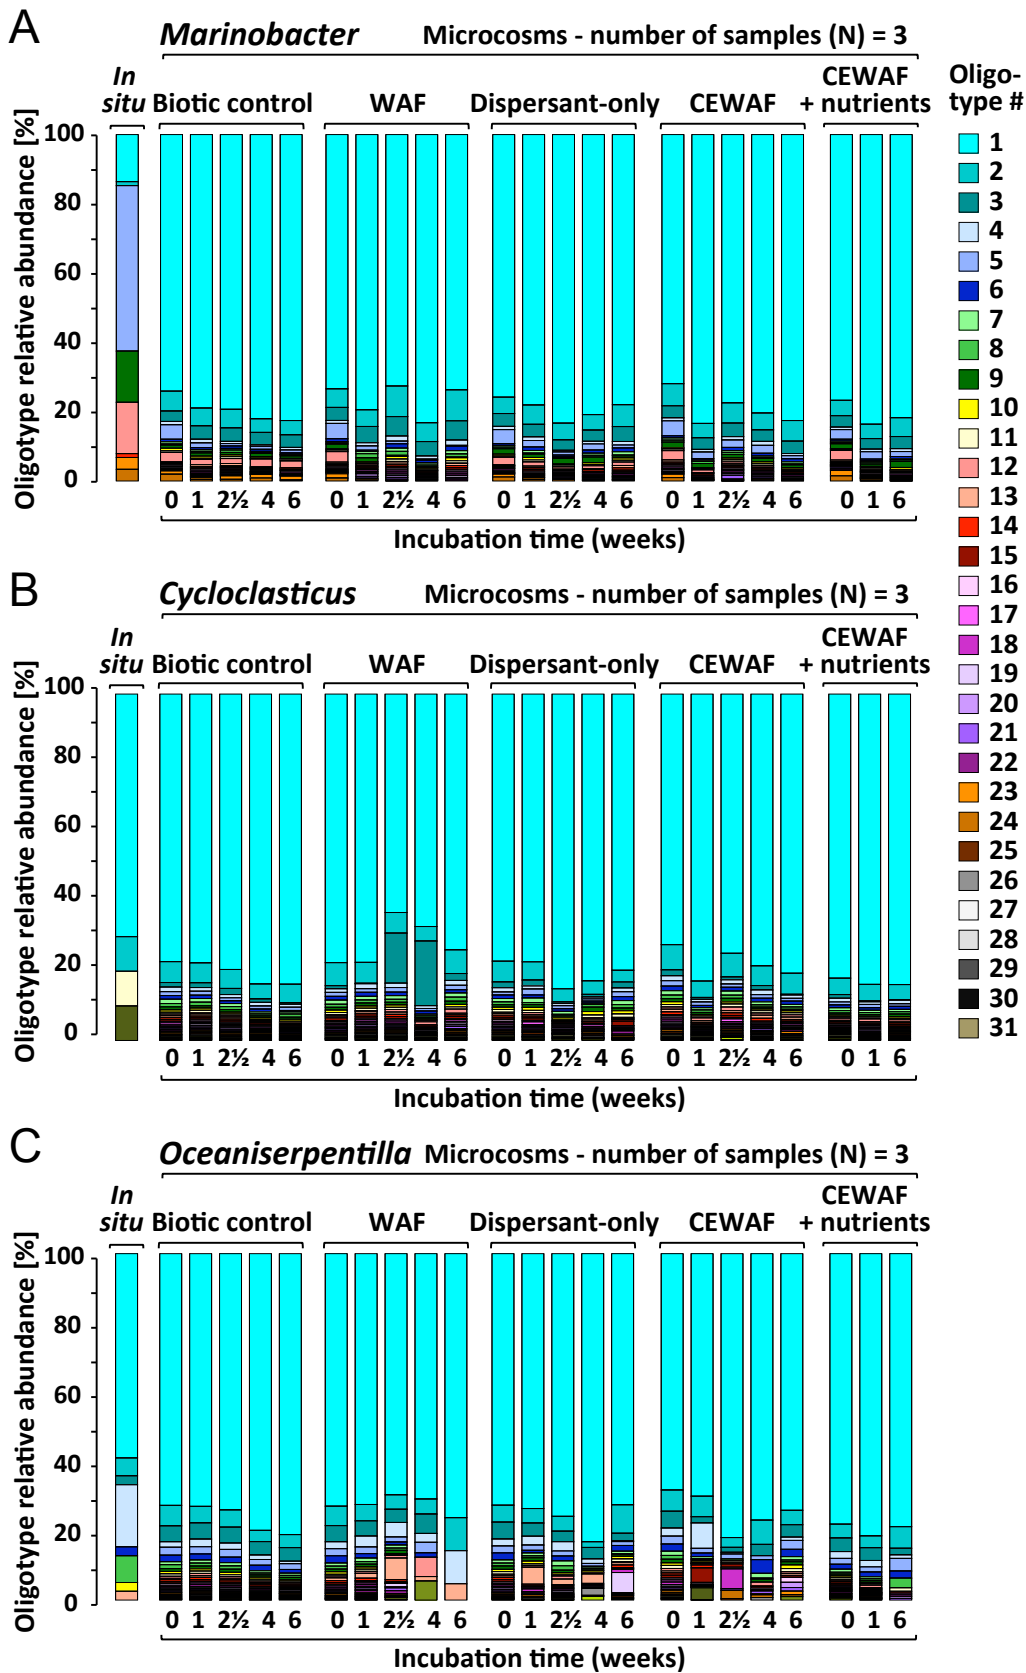

**Fig. S3. Different microbial oligotypes respond to dispersants or oil (WAF). Oligotyping enabled the interpretation of 16S rRNA gene sequence diversity at the level of**

specific oligotypes. Relative abundance (averaged across biological triplicates) of (A) *Marinobacter*, (B) *Cycloclasticus*, and (C) *Oceanispermantilla* oligotypes in microcosms, simulating DWH spill-like plumes.

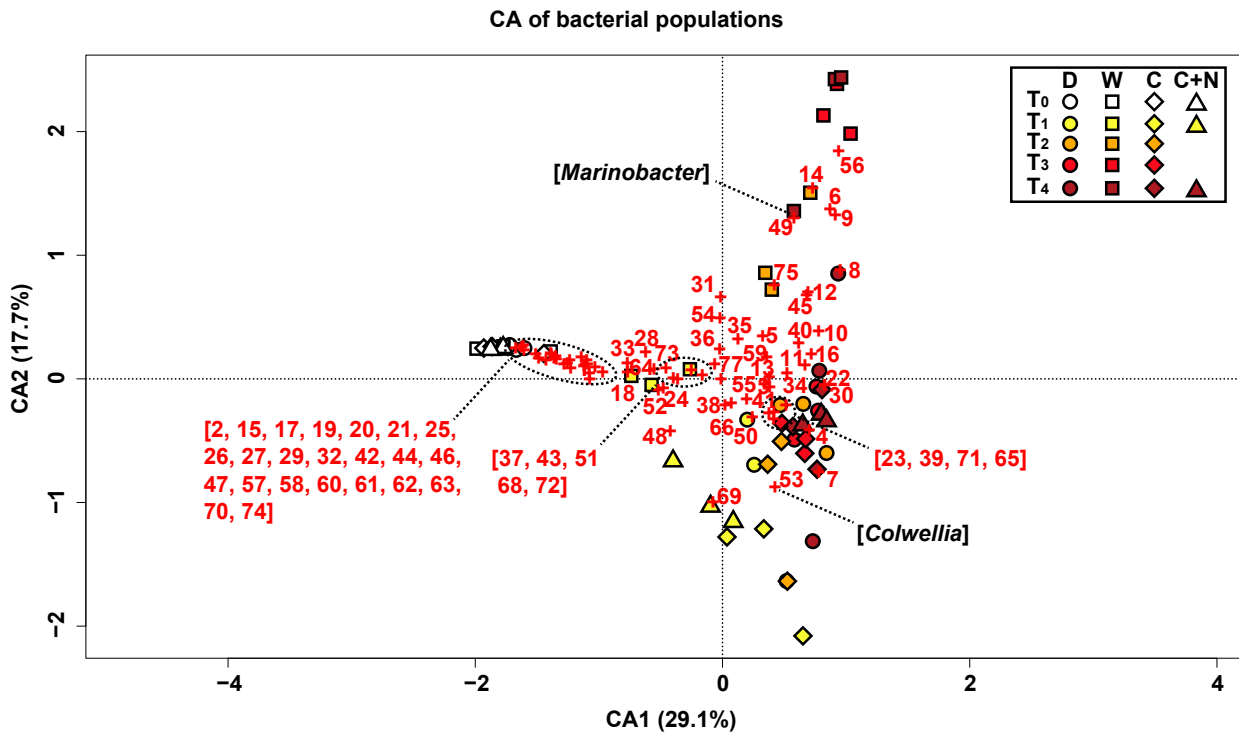

**Fig. S4. Statistical analysis of bacterial populations.** Correspondence Analysis (CA) plot of bacterial populations and microcosm samples of oil and dispersant treatments

[D (dispersant-only) = circle, W (WAF) = square, C (CEWAF) = diamond, C + N (CEWAF+nutrients) = triangle] explaining 46.6% of the data on two axes. The time points when samples were collected are color-coded ( $T_0$  = white,  $T_1$  = yellow,  $T_2$  = orange,  $T_3$  = red,  $T_4$  = dark-red) and the numbers referring to specific bacterial populations are listed below the plot. CA maximizes the correspondence between species scores and sample scores to address whether certain species are abundant in specific samples or treatments, as a measure of their ecological preferences. Bacterial populations located close to each other correspond to populations occurring together in microcosm samples. The distance between a bacterial population point and a sample point approximates the probability of that specific population to be abundant in that particular sample. Numbers of bacterial populations with too-close proximity in the CA plot are listed in parenthesis for better readability. *Marinobacter* and *Colwellia*, which correlated with oil-only or dispersant-amended samples, respectively, are pointed out.

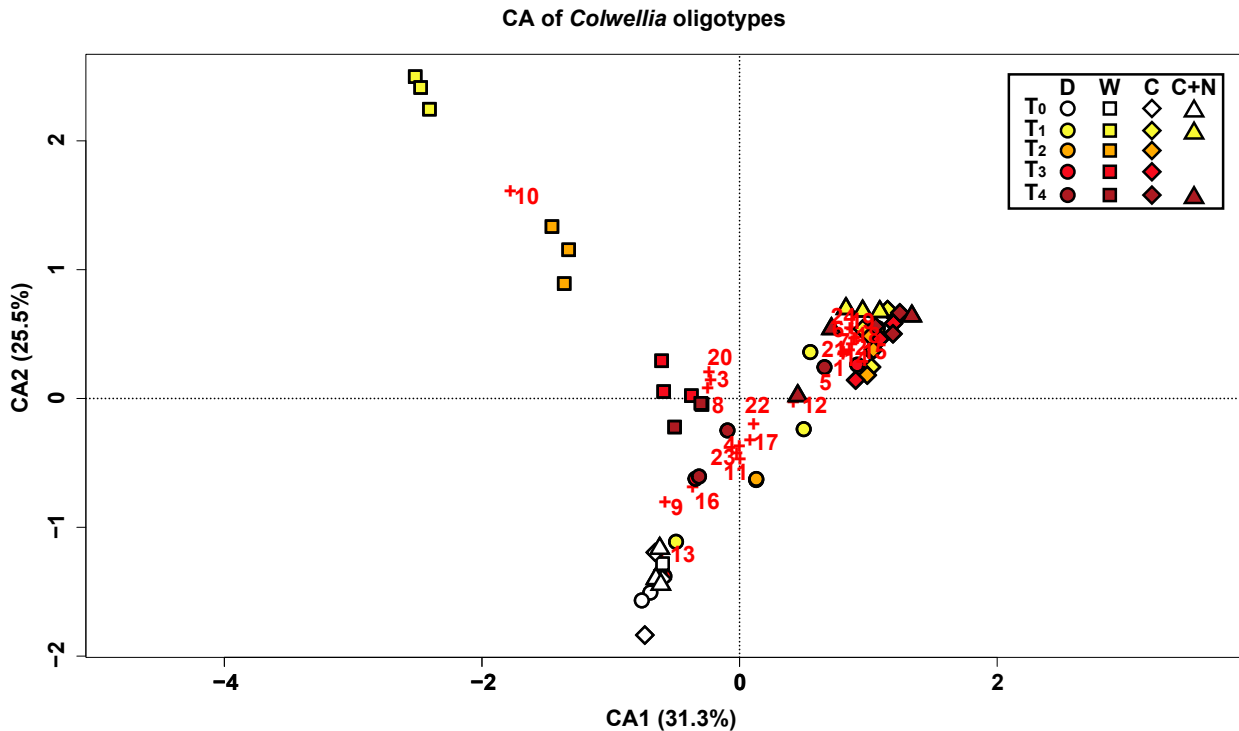

**Fig. S5. Statistical analysis of *Colwellia* populations.** Correspondence Analysis (CA) plot of *Colwellia* oligotypes and microcosm samples of all oil and dispersant treatments [D (dispersant-only) = circle, W (WAF) = square, C (CEWAF) = diamond, C + N (CEWAF+nutrients) = triangle] explaining 56.8% of the data on two axes. The time points of microcosm samples are color-coded (T<sub>0</sub> = white, T<sub>1</sub> = yellow, T<sub>2</sub> = orange, T<sub>3</sub> = red, T<sub>4</sub> = dark-red). CA maximizes the correspondence between species scores and sample scores to address whether certain species are abundant in specific samples or treatments, as a measure of their ecological preferences. Oligotypes located close to each other correspond to oligotypes occurring together in microcosm samples. The distance between an oligotype point and a sample point approximates the probability of that specific oligotype to be abundant in that particular sample.

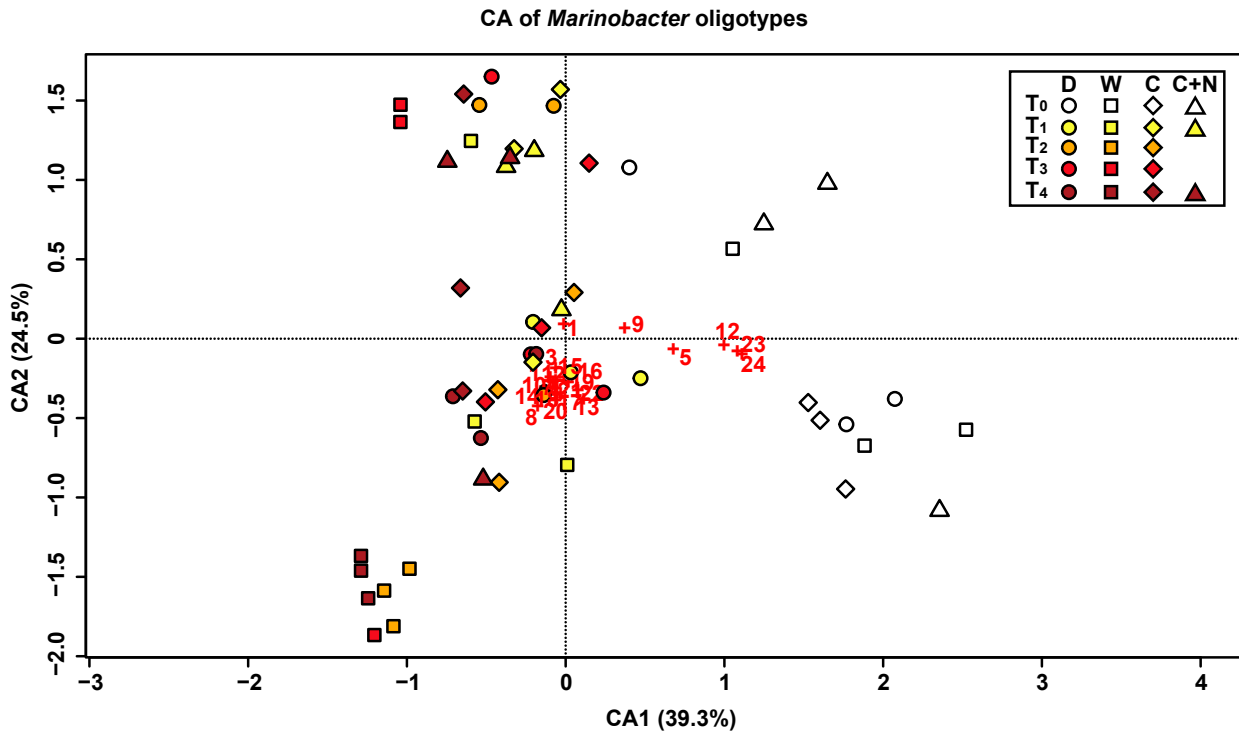

**Fig. S6. Statistical analysis of *Marinobacter* populations.** Correspondence Analysis (CA) plot of *Marinobacter* oligotypes and microcosm samples of all oil and dispersant treatments [D (dispersant-only) = circle, W (WAF) = square, C (CEWAF) = diamond, C + N (CEWAF+nutrients) = triangle] explaining 63.8% of the data on two axes. The time points of microcosm samples are color-coded (T<sub>0</sub> = white, T<sub>1</sub> = yellow, T<sub>2</sub> = orange, T<sub>3</sub> = red, T<sub>4</sub> = dark-red). CA maximizes the correspondence between species scores and sample scores to address whether certain species are abundant in specific samples or treatments, as a measure of their ecological preferences. Oligotypes located close to each other correspond to oligotypes occurring together in microcosm samples. The distance between an oligotype point and a sample point approximates the probability of that specific oligotype to be abundant in that particular sample.

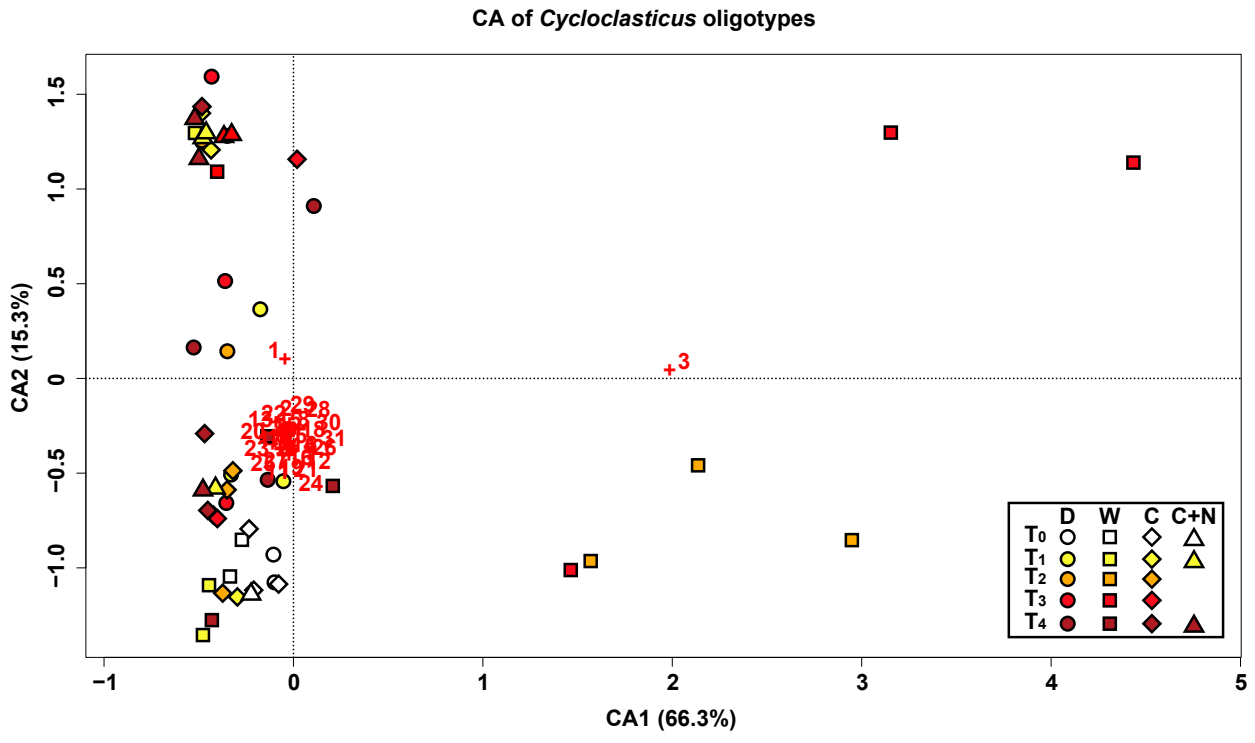

**Fig. S7. Statistical analysis of *Cycloclasticus* populations.** Correspondence Analysis (CA) plot of *Cycloclasticus* oligotypes and microcosm samples of all oil and dispersant treatments [D (dispersant-only) = circle, W (WAF) = square, C (CEWAF) = diamond, C + N (CEWAF+nutrients) = triangle] explaining 63.8% of the data on two axes. The time points of microcosm samples are color-coded (T<sub>0</sub> = white, T<sub>1</sub> = yellow, T<sub>2</sub> = orange, T<sub>3</sub> = red, T<sub>4</sub> = dark-red). CA maximizes the correspondence between species scores and sample scores to address whether certain species are abundant in specific samples or treatments, as a measure of their ecological preferences. Oligotypes located close to each other correspond to oligotypes occurring together in microcosm samples. The distance between an oligotype point and a sample point approximates the probability of that specific oligotype to be abundant in that particular sample.

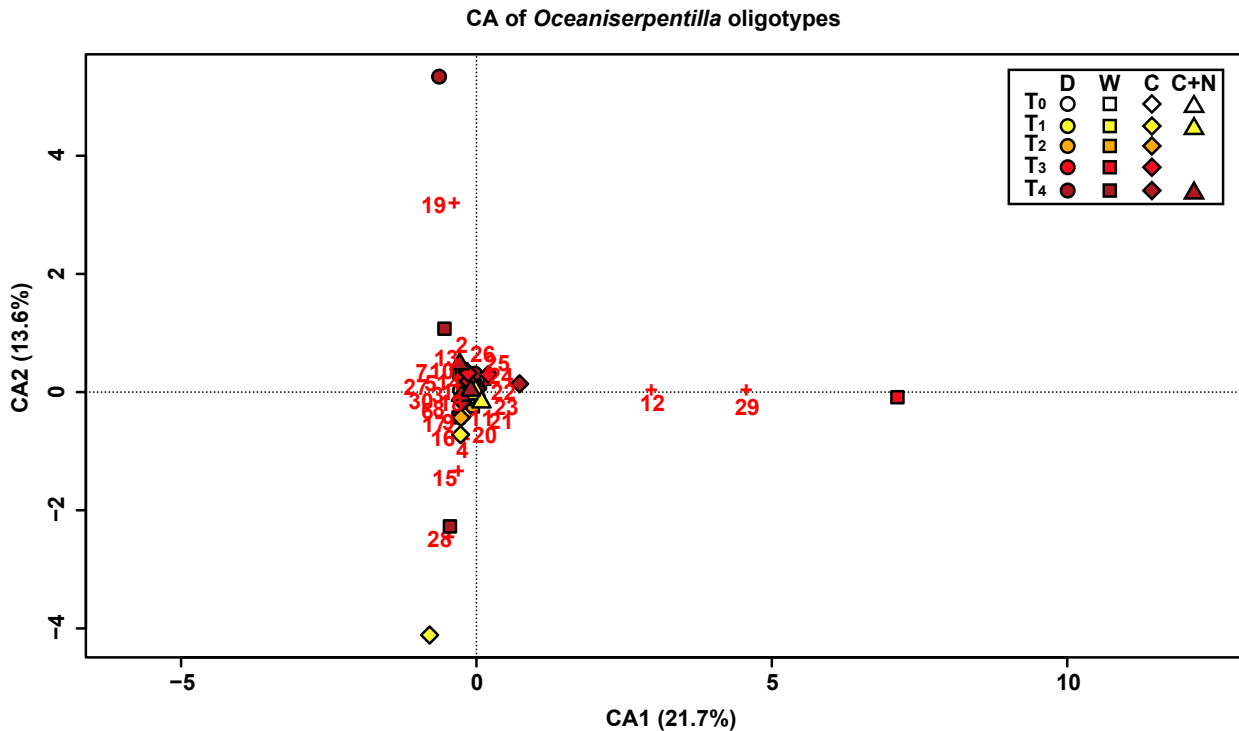

**Fig. S8. Statistical analysis of *Oceaniserpentilla* populations.** Correspondence Analysis (CA) plot of *Oceaniserpentilla* oligotypes and microcosm samples of all oil and dispersant treatments [D (dispersant-only) = circle, W (WAF) = square, C (CEWAF) = diamond, C + N (CEWAF+nutrients) = triangle] explaining 63.8% of the data on two axes. The time points of microcosm samples are color-coded (T<sub>0</sub> = white, T<sub>1</sub> = yellow, T<sub>2</sub> = orange, T<sub>3</sub> = red, T<sub>4</sub> = dark-red). CA maximizes the correspondence between species scores and sample scores to address whether certain species are abundant in specific samples or treatments, as a measure of their ecological preferences. Oligotypes located close to each other correspond to oligotypes occurring together in microcosm samples. The distance between an oligotype point and a sample point approximates the probability of that specific oligotype to be abundant in that particular sample.



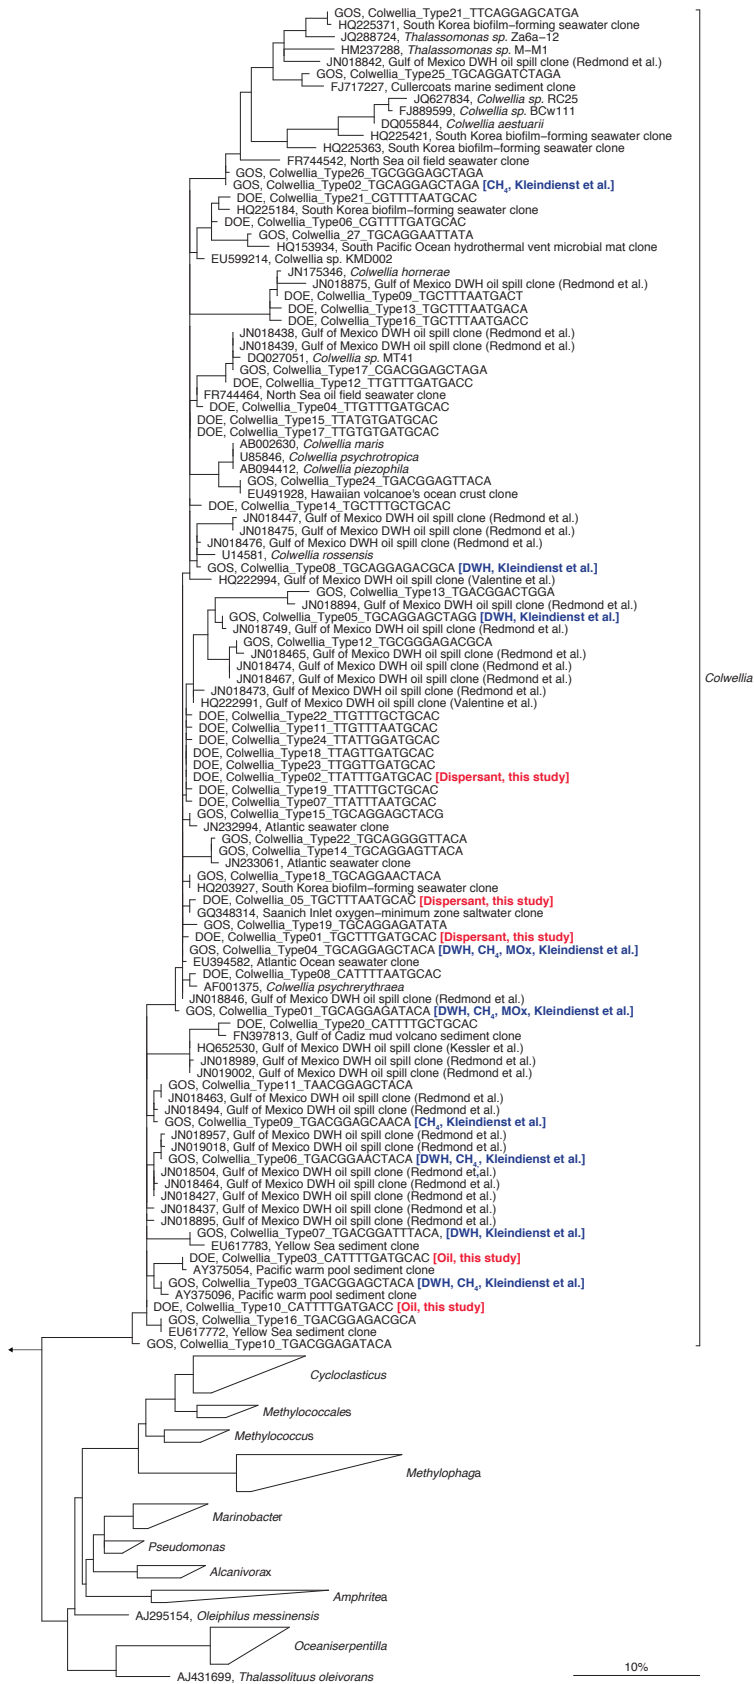

**Fig. S9. Phylogenetic relationships of *Colwellia* oligotypes from the microcosms with closely related organisms including spp. detected during the DWH oil spill. The tree**

was calculated by the distance-based neighbor-joining method and the bar represents 10% estimated sequence divergence. Oligotypes from the microcosms (dispersant-oil experiments; DOE) are shown in bold font. Furthermore, DOE-oligotypes that significantly correlated with dispersant and/or oil samples are shown in red font and labeled with [Dispersant] and/or [Oil]. Oligotypes detected before, during and/or after the DWH oil spill in Gulf of Mexico deep-sea waters *in situ* (Gulf of Mexico survey; GOS) are illustrated in blue font (3). Dominant GOS-oligotypes are shown in bold and increased GOS-oligotype abundance during the spill [DWH] as well as correlations with methane [CH<sub>4</sub>] and methane oxidation [MOx] are indicated.

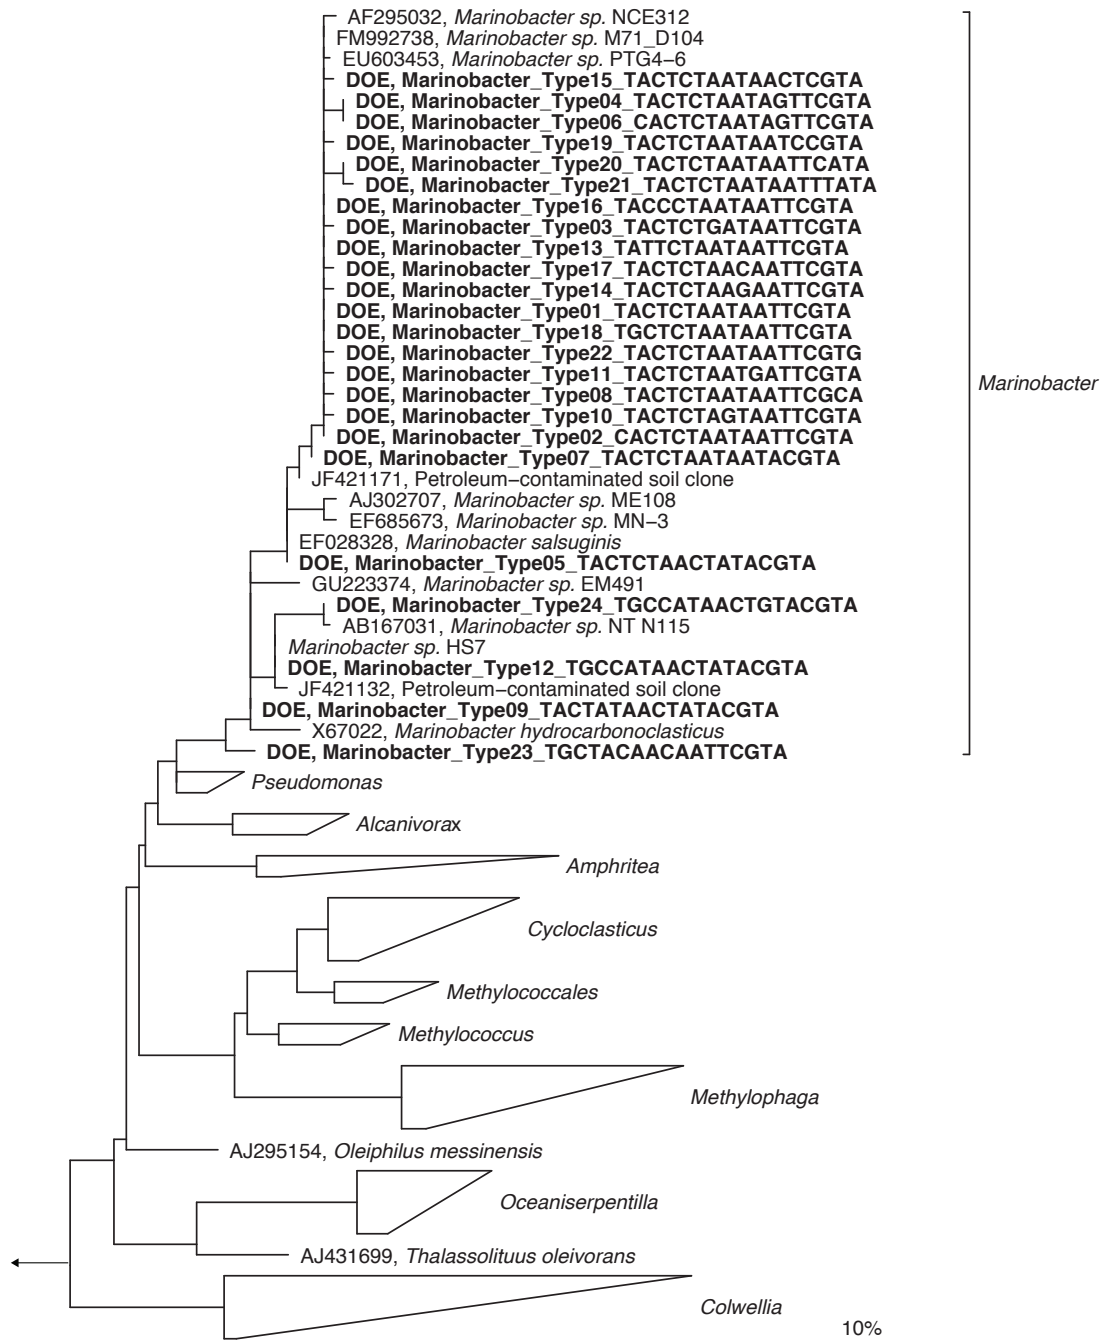

**Fig. S10. Phylogenetic relationships of *Marinobacter* oligotypes from the microcosms with closely related organisms.** The tree was calculated by the distance-based neighbor-joining method and the bar represents 10% estimated sequence divergence. Oligotypes from the microcosms (dispersant-oil experiments; DOE) are shown in bold font. *Marinobacter* were not found to be abundant before, during and/or after the DWH oil spill in Gulf of Mexico deep-sea waters *in situ* and, hence, potential spill oligotypes remained undetected (3).

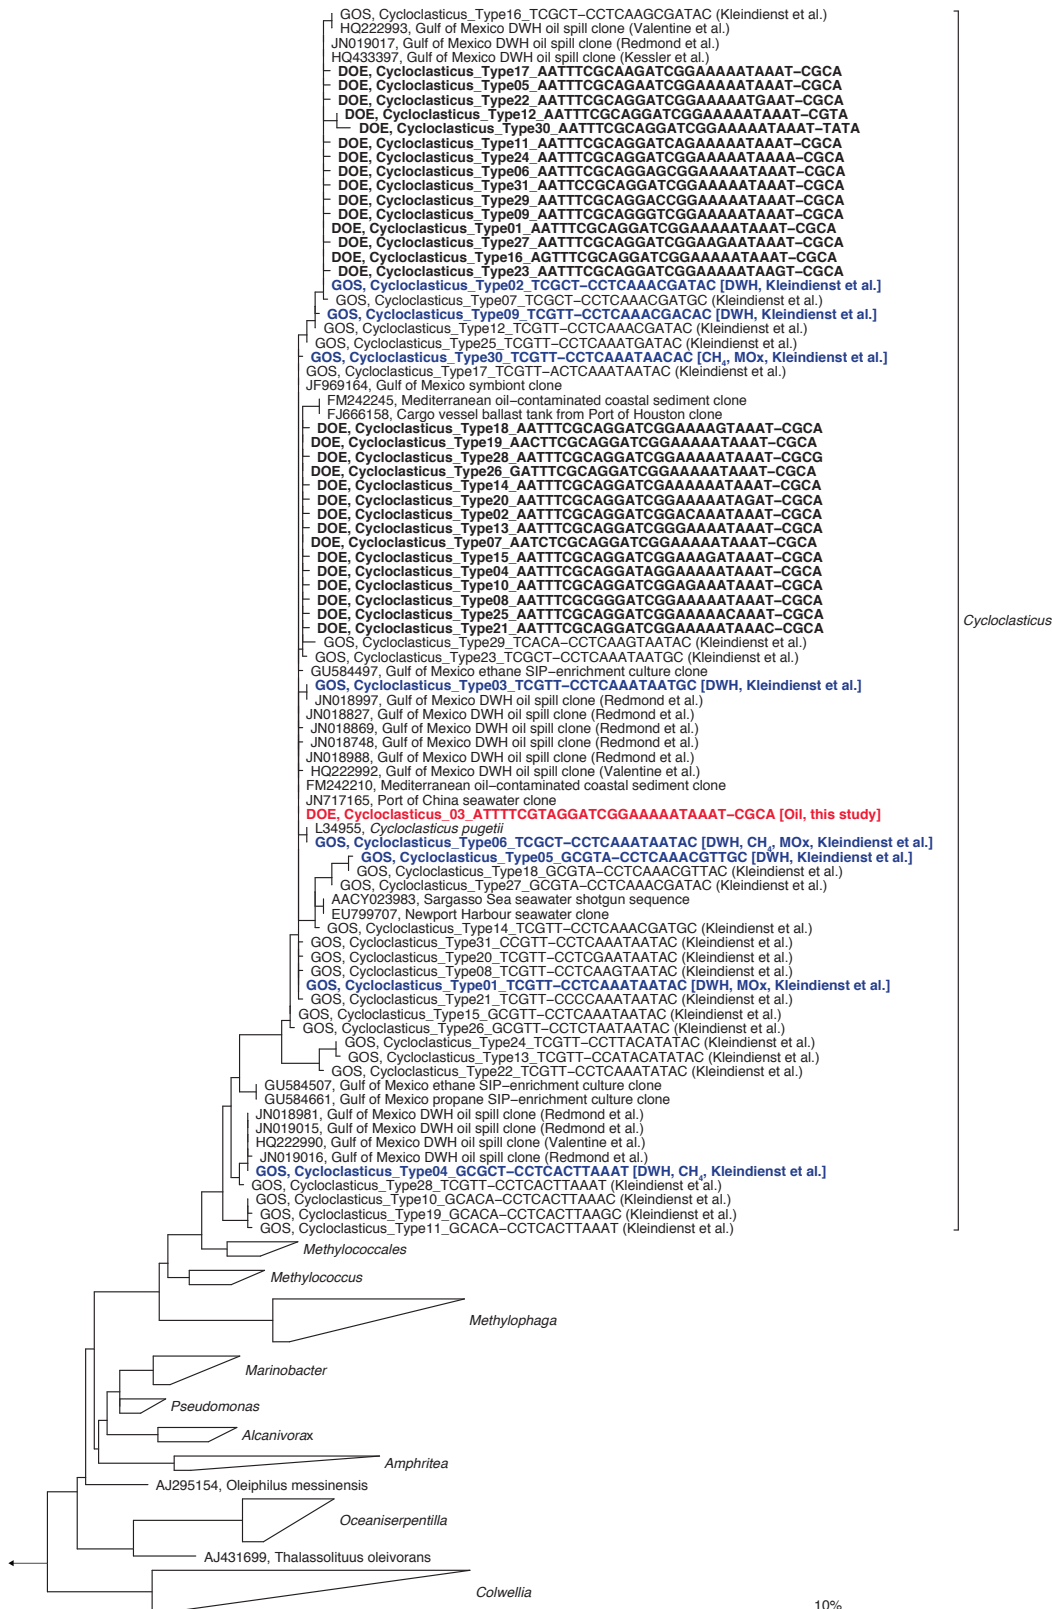

Fig. S11. Phylogenetic relationships of *Cycloclasticus* oligotypes from the microcosms with closely related organisms including spp. detected during the DWH

**oil spill.** The tree was calculated by the distance-based neighbor-joining method and the bar represents 10% estimated sequence divergence. Oligotypes from the microcosms (dispersant-oil experiments; DOE) are shown in bold font. Furthermore, a DOE-oligotype that significantly correlated with oil samples is shown in red font and labeled with [Oil]. Oligotypes detected before, during and/or after the DWH oil spill in Gulf of Mexico deep-sea waters *in situ* (Gulf of Mexico survey; GOS) are illustrated in blue font (3). Dominant GOS-oligotypes are shown in bold and increased GOS-oligotype abundance during the spill [DWH] as well as correlations with methane [CH<sub>4</sub>] and methane oxidation [MOx] are indicated.

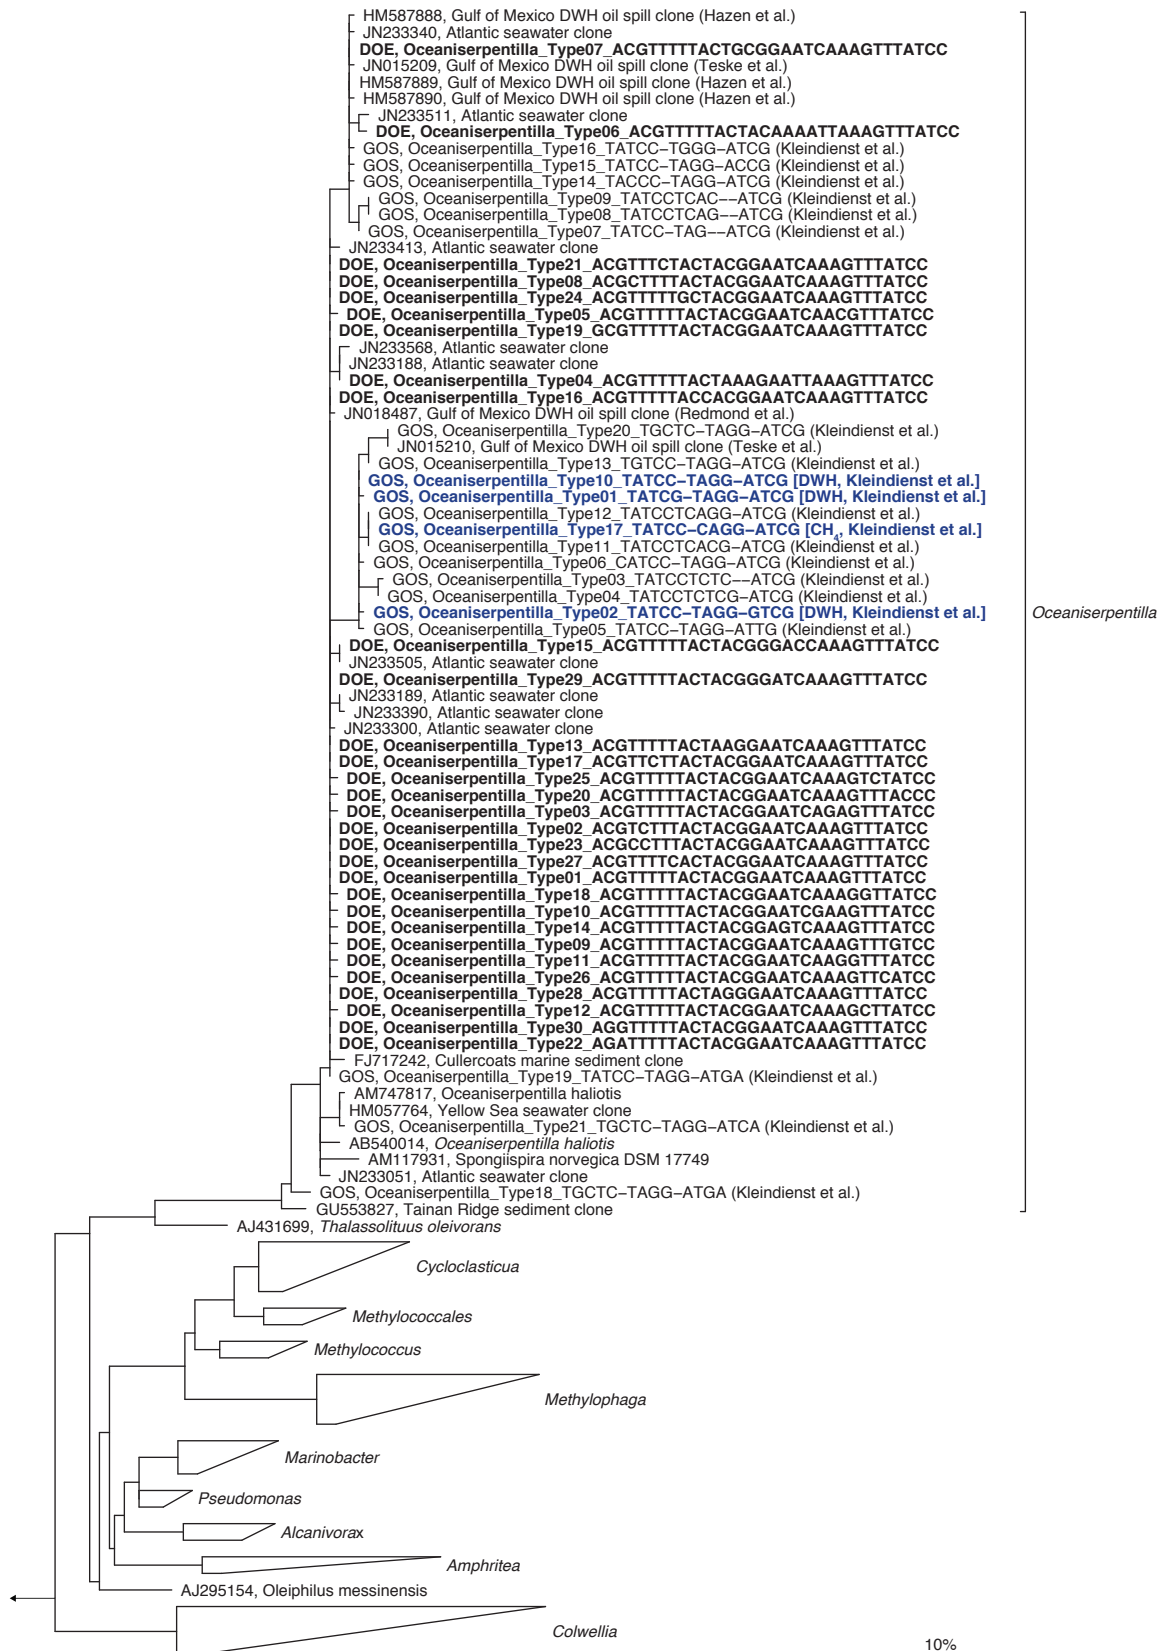

**Fig. S12. Phylogenetic relationships of *Oceaniserpentilla* oligotypes from the microcosms with closely related organisms including spp. detected during the DWH**

**oil spill.** The tree was calculated by the distance-based neighbor-joining method and the bar represents 10% estimated sequence divergence. Oligotypes from the microcosms (dispersant-oil experiments; DOE) are shown in bold font. Oligotypes detected before, during and/or after the DWH oil spill in Gulf of Mexico deep-sea waters *in situ* (Gulf of Mexico survey; GOS) are illustrated in blue font (3). Dominant GOS-oligotypes are shown in bold and increased GOS-oligotype abundance during the spill [DWH] as well as correlations with methane [CH<sub>4</sub>] are indicated.



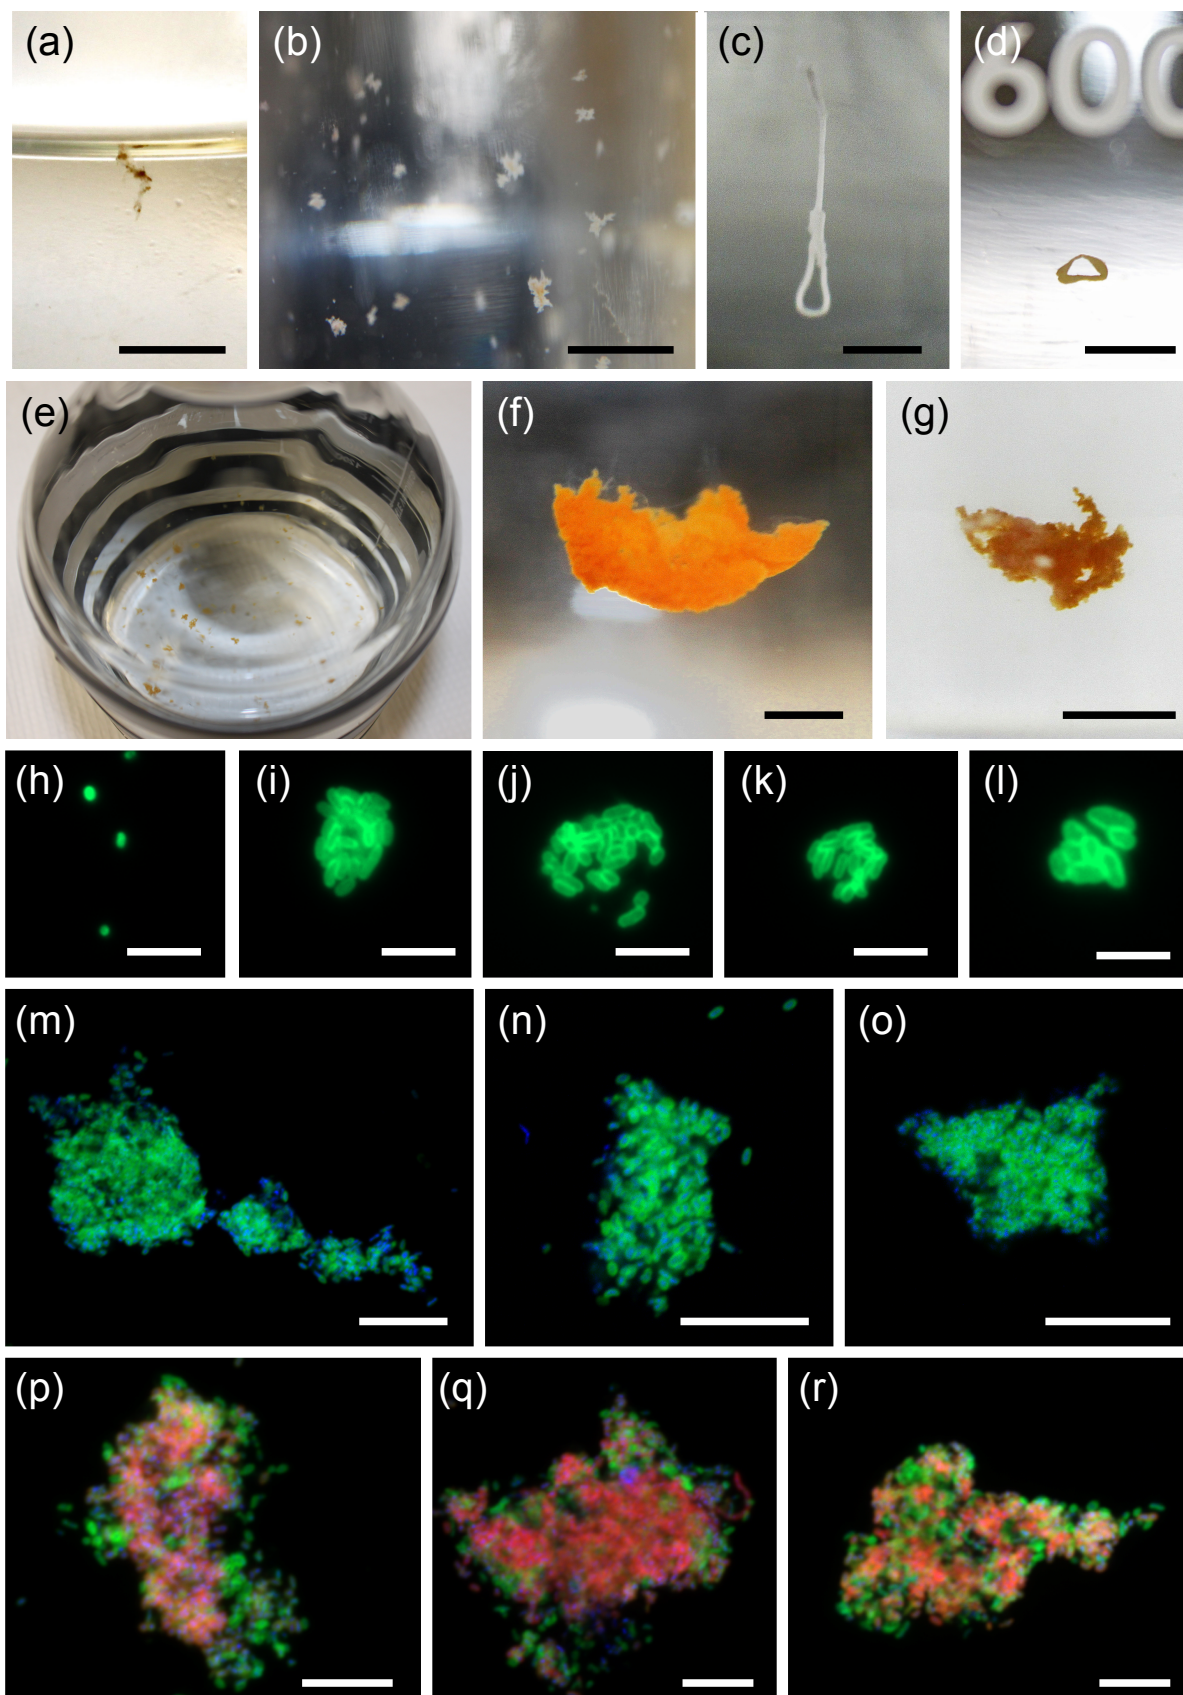

**Fig. S13.** Photographs of representative macroscopically visible particles (>0.5 mm) that formed during the experiment in the different treatments (a-g) and



**epifluorescence micrographs (h-l) as well as confocal laser scanning micrographs (m-r) of bacterial micro-aggregates (<500 µm) visualized by CARD-FISH.** Scale bars = 0.5 cm in photographs (a-d, f, g), 5 µm in epifluorescence micrographs (h-l), and 10 µm in confocal laser scanning micrographs (m-r).

In contrast to controls, where no macroscopical aggregates formed during the experiment, stringy, mucus-rich and fractal looking, colored macroscopical particles formed abundantly in WAF treatments (a; after 15 days), with their abundance increasing continuously over time (b; after 8 weeks). A few white long (cm) filaments formed in dispersant-only treatments (c after 15 days of incubation). Macroscopic particles in the CEWAF treatment were rare, small, colored. Formation of macroscopic particles was fastest and particles largest in the CEWAF+nutrients treatment: bird eye view of the whole bottle of the CEWAF+nutrients treatment, showing numerous macroscopic particles (after 9 days; e) and close-up of large, single particles from the same treatment (CEWAF+nutrients) after 11 days (f) and 15 days (g). During the six-week experiment the number of aggregates increased in all three treatments containing oil (WAF, CEWAF ±nutrients) but comparably the particles formed slower and remained smaller in both treatments without added nutrients (WAF, CEWAF).

Fluorescence microscopy demonstrated the formation of microbial aggregates or clusters in all treatments that contained macroscopical particles (k = WAF, l = dispersant-only, m = CEWAF, n-t = CEWAF+nutrients each after 2½ weeks,). Only individual cells were observed in the controls (j; biotic control after 2½ weeks). Single CARD-FISH hybridizations were performed using a probe targeting all *Gammaproteobacteria* (j-n), while dual CARD-FISH hybridizations were performed using probes targeting all Bacteria (green; o-t) and *Alteromonadales* including *Colwellia* (red; o-t). Counter-staining with 4',6-Diamidin-2-phenylindol (DAPI; blue) is visualized in confocal laser scanning micrographs (o-t).

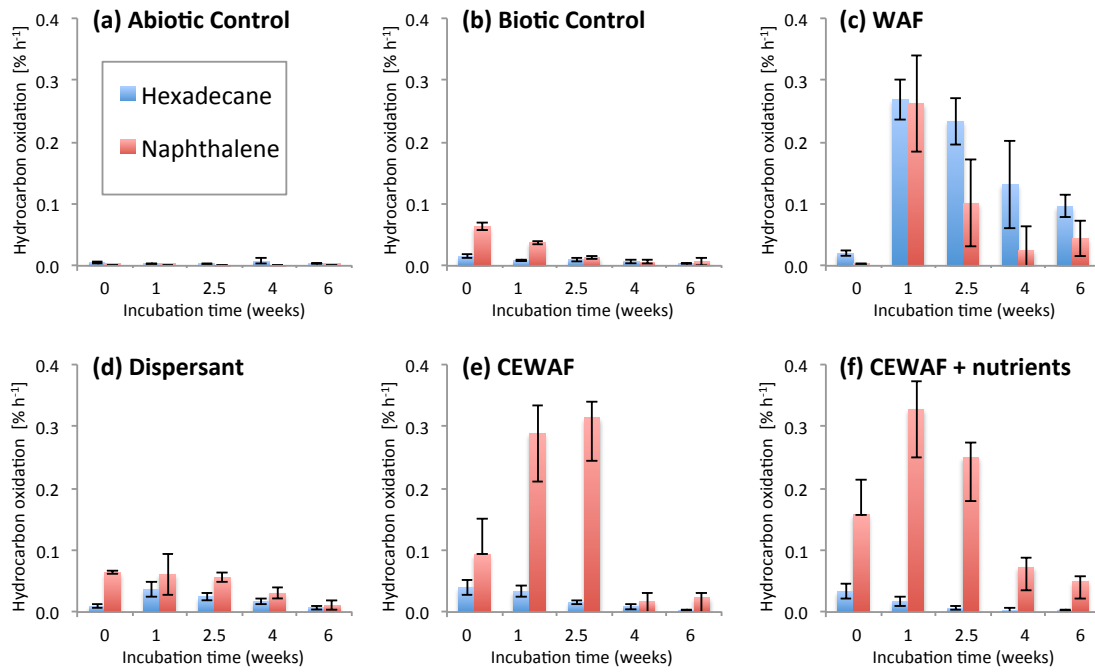

**Fig. S14.** Hydrocarbon turnover of <sup>14</sup>C-hexadecane and <sup>14</sup>C-naphthalene per hour in the different microcosms (a-f) over time. Standard deviations represent variations among triplicate setups.

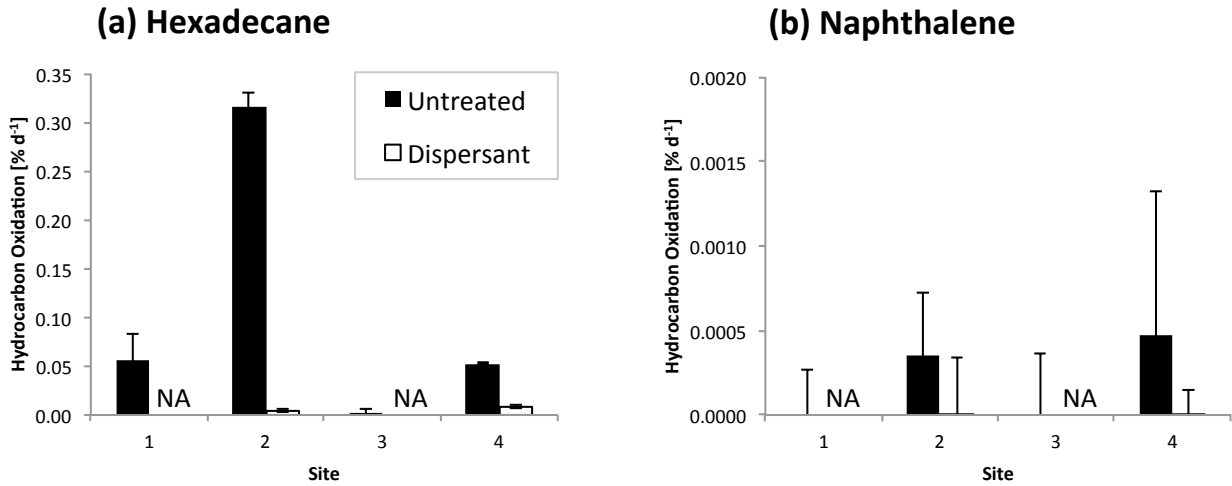

**Fig. S15. Hydrocarbon turnover of <sup>14</sup>C-hexadecane (a) and <sup>14</sup>C-naphthalene (b) in oil-contaminated seawater samples.** Samples remained untreated (■) or were amended with 10 µl dispersant per L seawater (□) prior to the application of radiotracer. Oil-contaminated samples were collected in the Gulf of Mexico along a transect from the Taylor Energy Platform to the Mississippi plume; site 1: source of oil (strong fumes), site 2: slick meets Mississippi plume (i.e., the mousse site), sites 3 and 4: intermediate transect. Due to sample volume limitations, sites 1 and 3 were not assayed with dispersants (NA).

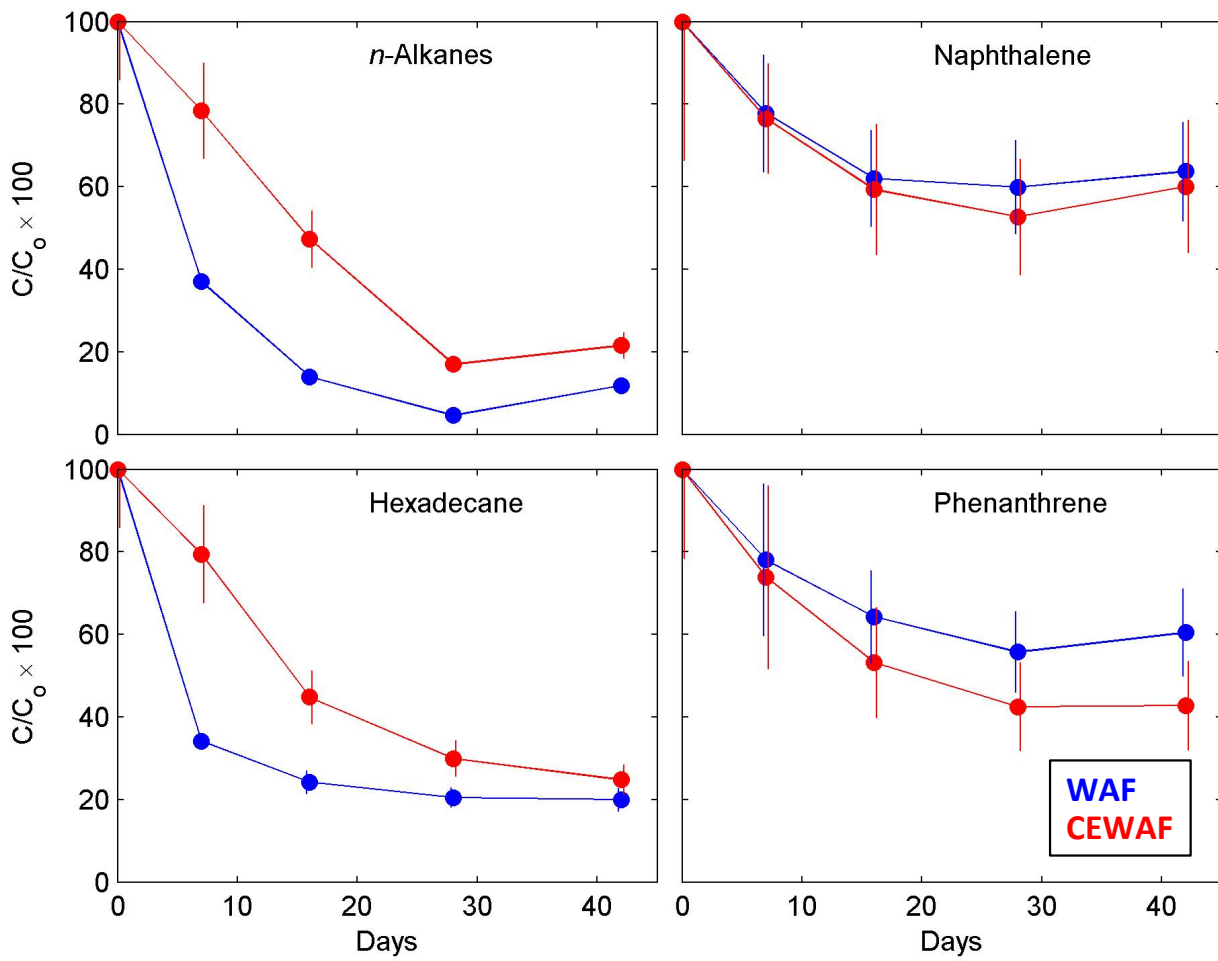

**Fig. S16. Biodegradation of oil-derived compounds.** Time series of normalized concentration of oil-derived compounds in WAF (blue) and CEWAF (red) treatments. Error bars show standard deviation between replicates. In some cases error bars are smaller than the size of the symbols.

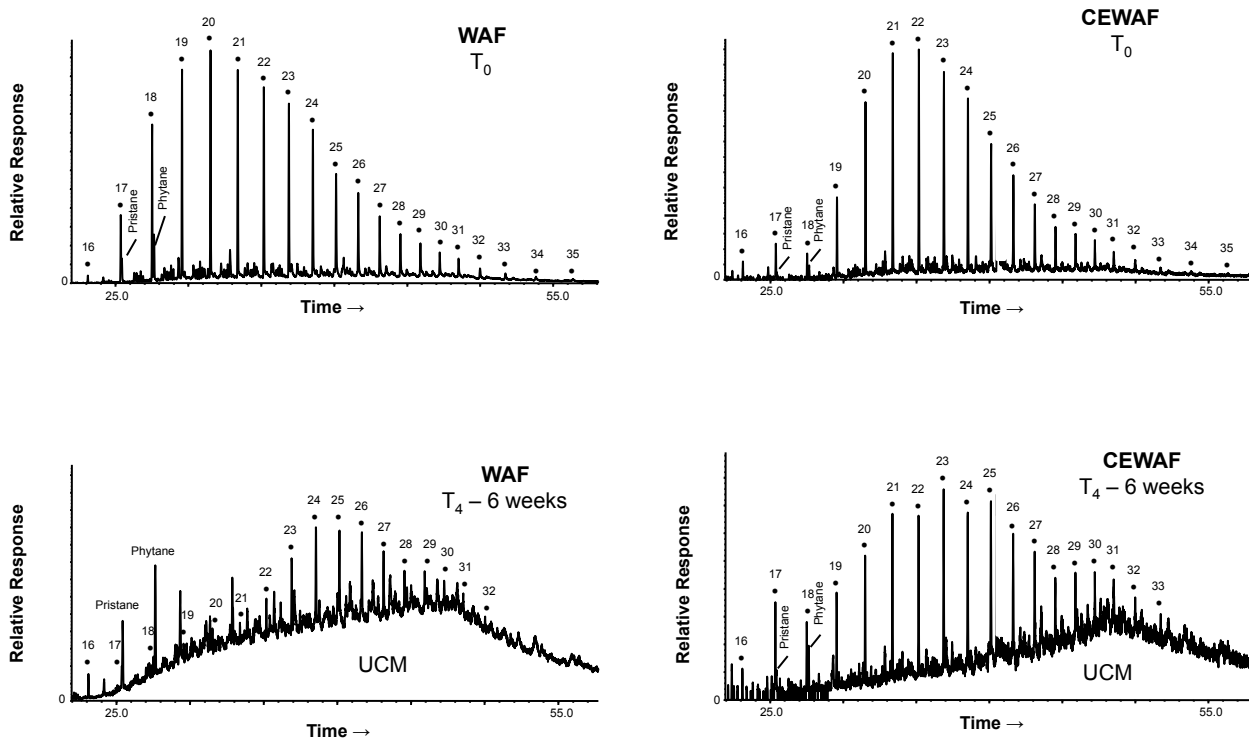

**Fig. S17. Chromatograms of WAF and CEWAF treatments before and after 6 weeks incubation.** Salient features of GC-MS data from different treatments summarized in total ion current (TIC) traces. Numbers refer to carbon chain length of *n*-alkanes. UCM = unresolved complex mixture.

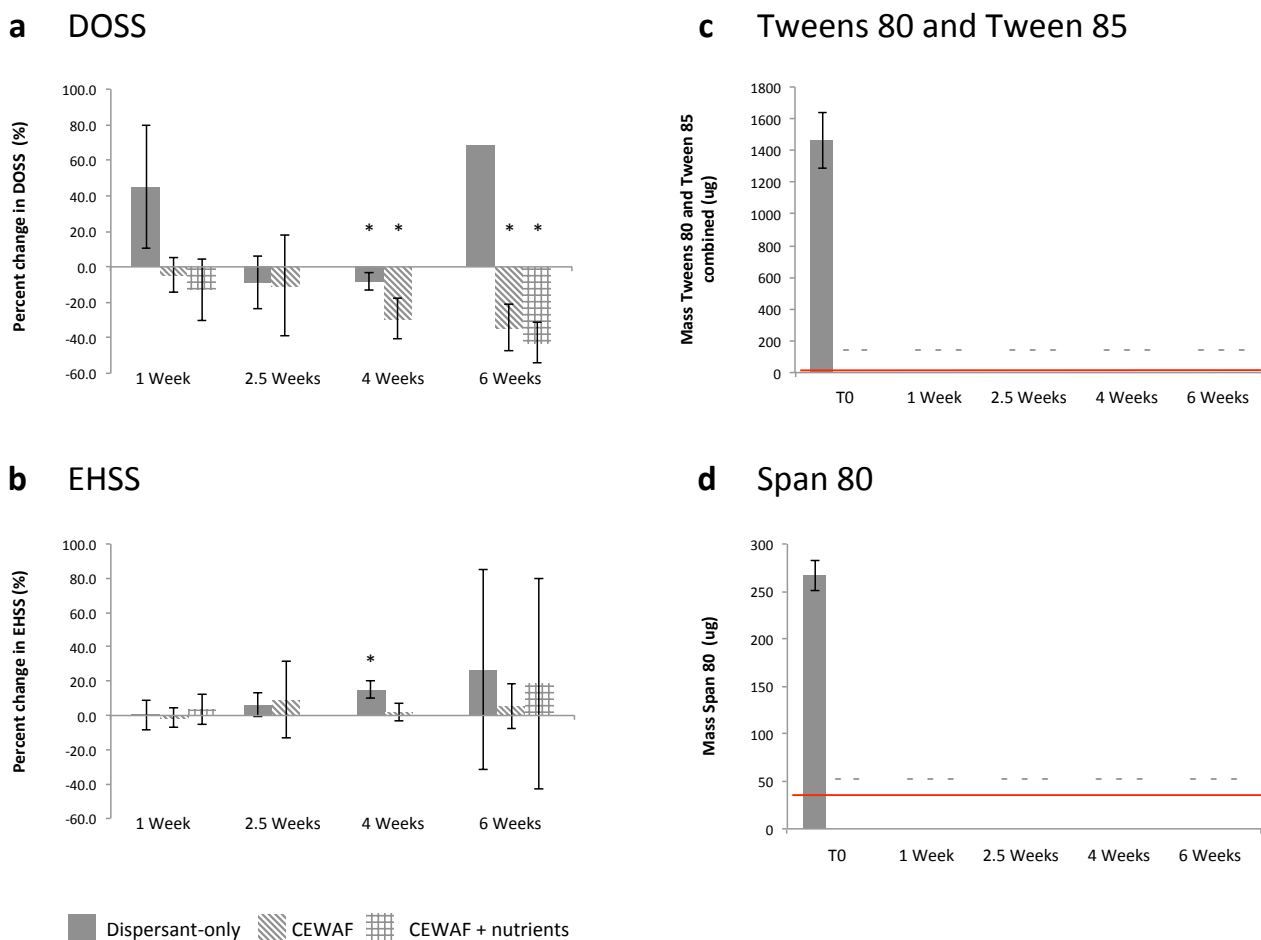

**Fig. S18. Anionic and nonionic surfactants in dispersant-only and CEWAF ± nutrients treatments within 6 weeks incubation.** Mean percent change in DOSS (a) and EHSS (b) relative to time zero samples as well as mean mass of total Tweens (Tween 80 and Tween 85; c) and Span 80 (d) were determined by liquid chromatography tandem mass spectrometry. Error bars represent 95% confidence intervals ( $n = 3$ ). Asterisk (\*) indicates a statistically significant change (Student's t-test,  $\alpha = 0.05$ ) and negative (-) indicates an observation below the limit of detection for the nonionic surfactants ( $36 \mu\text{g}$ ,  $20 \mu\text{g/L}$ ), illustrated as red line.

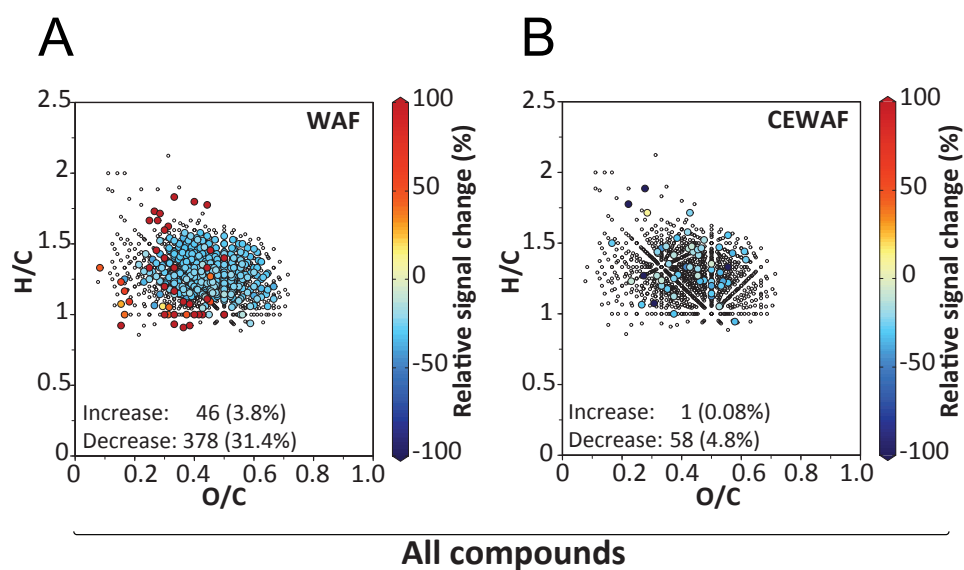

**Fig. S19. Dispersants impact microbial turnover of dissolved organic matter.** Analysis of molecular-level patterns in Van Krevelen diagrams (hydrogen-to-carbon, H/C, and oxygen-to-carbon, O/C ratios; each circle represents a molecular formula). (A and B) Molecular formulae present in all treatments ( $n = 1,205$ ) and that significantly changed ( $p \leq 0.01$ , determined on triplicates using Student's *t* test) relative signal intensities between the initial and last time points. The color scales represent changes in relative intensities (open circles, no significant change).

**Table S1: Analytical data, cell counts, rate measurements and TEP data from the microcosms simulating DWH spill-like plumes (abiotic control, biotic control, WAF, dispersant-only, CEWAF, CEWAF+nutrients) monitored for 6 weeks.**

| Treatment       | Time (weeks) | Setup # | Salinity | pH   | O <sub>2</sub> (µM) | DOC (µM) | DON (µM) | TDN (µM) | TDP (µM) | NO <sub>2</sub> (µM) | NO <sub>3</sub> (µM) | PO <sub>4</sub> (µM) | NH <sub>4</sub> (µM) | DIC (mM) | Cell counts (ml <sup>-1</sup> ) | Bact. Prod. (nM C/day) | Naphth. (µg/L)* | Total Petroleum (µg/L) <sup>#</sup> | Hydrocarbon ox rates                   |                                       | Hydrolysis rates   |                      |                 | TEP (Gxeq/L) |
|-----------------|--------------|---------|----------|------|---------------------|----------|----------|----------|----------|----------------------|----------------------|----------------------|----------------------|----------|---------------------------------|------------------------|-----------------|-------------------------------------|----------------------------------------|---------------------------------------|--------------------|----------------------|-----------------|--------------|
|                 |              |         |          |      |                     |          |          |          |          |                      |                      |                      |                      |          |                                 |                        |                 |                                     | <sup>14</sup> C Hexadec. rate (nM/day) | <sup>14</sup> C Naphth. rate (nM/day) | Peptidase (nM/day) | Glucosidase (nM/day) | Lipase (nM/day) |              |
| Abiotic Control | 0            | 1       | 36       | 7.78 | 240.41              | 50.65    | 9.89     | 33.80    | 1.65     | <LOD                 | 24.15                | 1.65                 | 0.24                 | 3.45     | 6.35E+02                        | -0.02                  | NA              | NA                                  | NA                                     | NA                                    | -0.2349            | -0.0657              | 2.0427          | 43.25        |
|                 |              | 2       | 36       | 7.79 | 236.35              | 45.84    | 10.46    | 34.17    | 1.70     | <LOD                 | 23.71                | 1.70                 | 0.00                 | 3.26     | 6.35E+02                        | -0.03                  | NA              | NA                                  | NA                                     | NA                                    | -0.0599            | -0.0609              | 1.9272          | 58.98        |
|                 |              | 3       | 36.5     | 7.81 | 239.78              | 39.92    | 9.18     | 32.97    | 1.70     | <LOD                 | 24.04                | 1.70                 | 0.24                 | 3.37     | 0.00E+00                        | -0.07                  | NA              | NA                                  | NA                                     | NA                                    | -0.0599            | -0.0285              | 1.8893          | 54.32        |
|                 |              | AV      | 36.17    | 7.79 | 238.85              | 45.47    | 9.84     | 33.65    | 1.69     | <LOD                 | 23.97                | 1.68                 | 0.16                 | 3.36     | 4.23E+02                        | -0.04                  | <LOD            | <LOD                                | 7.53E-08                               | 3.76E-09                              | -0.1182            | -0.0517              | 1.9531          | 52.18        |
|                 |              | SD      | 0.29     | 0.02 | 2.19                | 5.38     | 0.64     | 0.61     | 0.03     | <LOD                 | 0.23                 | 0.03                 | 0.14                 | 0.09     | 3.66E+02                        | 0.03                   | NA              | NA                                  | 2.87E-11                               | 2.42E-12                              | 0.1010             | 0.0202               | 0.0799          | 8.08         |
|                 | 1            | 1       | NA       | 7.74 | 235.72              | 37.40    | 12.55    | 35.45    | 1.70     | NA                   | 23.02                | 1.70                 | 0.12                 | 2.62     | 1.90E+03                        | -0.12                  | NA              | NA                                  | NA                                     | NA                                    | 0.2039             | 0.1960               | 3.1366          | NA           |
|                 |              | 2       | NA       | 7.86 | 247.91              | 78.03    | 14.44    | 37.72    | 1.75     | <LOD                 | 23.23                | 1.24                 | -0.05                | 2.67     | 6.35E+02                        | 0.00                   | NA              | NA                                  | NA                                     | NA                                    | 0.2982             | 0.2026               | 2.4749          | NA           |
|                 |              | 3       | NA       | 7.86 | 239.78              | 42.29    | 12.06    | 34.31    | 1.75     | <LOD                 | 22.78                | 1.70                 | 0.52                 | 2.57     | 9.52E+02                        | 0.31                   | NA              | NA                                  | NA                                     | NA                                    | 0.3557             | 0.1806               | 2.6188          | NA           |
|                 |              | AV      | NA       | 7.82 | 241.14              | 52.57    | 13.01    | 35.83    | 1.74     | <LOD                 | 23.01                | 1.55                 | 0.20                 | 2.62     | 1.16E+03                        | 0.07                   | <LOD            | <LOD                                | 9.05E-08                               | -4.67E-09                             | 0.2859             | 0.1931               | 2.7434          | NA           |
|                 |              | SD      | NA       | 0.07 | 6.21                | 22.18    | 1.26     | 1.74     | 0.03     | <LOD                 | 0.23                 | 0.26                 | 0.29                 | 0.05     | 6.61E+02                        | 0.22                   | NA              | NA                                  | 4.22E-11                               | 2.13E-12                              | 0.0766             | 0.0113               | 0.3480          | NA           |
|                 | 2.5          | 1       | NA       | 7.82 | 232.91              | 39.54    | 12.40    | 33.77    | 1.70     | <LOD                 | 21.64                | 1.75                 | 0.26                 | 2.74     | 3.17E+02                        | -0.33                  | NA              | NA                                  | NA                                     | NA                                    | -0.3941            | 0.0538               | 5.7140          | NA           |
|                 |              | 2       | NA       | 7.77 | 236.35              | 37.59    | 12.72    | 33.66    | 1.70     | <LOD                 | 21.75                | 1.70                 | 0.81                 | 2.69     | 3.17E+02                        | -0.14                  | NA              | NA                                  | NA                                     | NA                                    | -0.3700            | 0.0222               | 3.4673          | NA           |
|                 |              | 3       | NA       | 7.74 | 266.98              | 41.46    | 13.28    | 33.91    | 1.70     | <LOD                 | 21.20                | 1.65                 | 0.57                 | 2.37     | 6.35E+02                        | 0.04                   | NA              | NA                                  | NA                                     | NA                                    | -0.3700            | 0.0127               | 4.4681          | NA           |
|                 |              | AV      | NA       | 7.78 | 245.41              | 39.53    | 12.80    | 33.78    | 1.70     | <LOD                 | 21.53                | 1.70                 | 0.55                 | 2.60     | 4.23E+02                        | -0.14                  | <LOD            | <LOD                                | 4.58E-08                               | 2.63E-09                              | -0.3780            | 0.0296               | 4.5498          | NA           |
|                 |              | SD      | NA       | 0.04 | 18.76               | 1.93     | 0.45     | 0.12     | 0.00     | <LOD                 | 0.29                 | 0.05                 | 0.27                 | 0.20     | 1.83E+02                        | 0.18                   | NA              | NA                                  | 2.70E-11                               | 1.04E-12                              | 0.0139             | 0.0215               | 1.1256          | NA           |
|                 | 4            | 1       | NA       | 7.79 | 235.10              | 36.55    | 11.47    | 33.96    | 1.90     | <LOD                 | 22.55                | 1.73                 | 0.06                 | 2.41     | 0.00E+00                        | 0.06                   | NA              | NA                                  | NA                                     | NA                                    | 0.7001             | 0.0930               | 6.7215          | NA           |
|                 |              | 2       | NA       | 7.81 | 241.97              | 38.94    | 12.55    | 34.72    | 1.74     | 0.02                 | 22.21                | 1.73                 | 0.06                 | 2.67     | 0.00E+00                        | 0.27                   | NA              | NA                                  | NA                                     | NA                                    | 0.6148             | 0.0930               | 5.2604          | NA           |
|                 |              | 3       | NA       | 7.82 | 256.67              | 43.76    | 10.76    | 34.72    | 9.98     | 0.02                 | 23.95                | 1.59                 | 0.00                 | 2.57     | 3.17E+02                        | -0.47                  | NA              | NA                                  | NA                                     | NA                                    | 0.4146             | 0.0930               | 5.3191          | NA           |
|                 |              | AV      | NA       | 7.81 | 244.58              | 39.75    | 11.59    | 34.47    | 4.54     | 0.02                 | 22.90                | 1.68                 | 0.04                 | 2.55     | 1.06E+02                        | -0.05                  | <LOD            | <LOD                                | 1.14E-07                               | -2.62E-09                             | 0.5765             | 0.0930               | 5.7670          | NA           |
|                 |              | SD      | NA       | 0.02 | 11.02               | 3.67     | 0.91     | 0.44     | 4.71     | 0.00                 | 0.92                 | 0.08                 | 0.03                 | 0.13     | 1.83E+02                        | 0.38                   | NA              | NA                                  | 5.79E-11                               | 1.66E-12                              | 0.1466             | 0.0000               | 0.8271          | NA           |
|                 | 6            | 1       | 36       | 7.9  | 252.92              | 38.44    | 11.78    | 33.50    | 1.74     | <LOD                 | 22.35                | 1.96                 | 0.63                 | 2.90     | 3.17E+02                        | -0.64                  | NA              | NA                                  | NA                                     | NA                                    | 0.8427             | 0.0000               | 4.5370          | 118.34       |
|                 |              | 2       | 36       | 7.93 | 248.54              | 39.73    | 11.92    | 34.11    | 1.79     | 0.02                 | 22.67                | 1.59                 | 0.49                 | 2.19     | 0.00E+00                        | -0.62                  | NA              | NA                                  | NA                                     | NA                                    | 0.7881             | 0.0404               | 3.2573          | 50.63        |
|                 |              | 3       | 36       | 7.97 | 250.73              | 36.12    | 11.89    | 34.16    | 1.74     | 0.02                 | 22.46                | 2.23                 | 0.21                 | 2.30     | 3.17E+02                        | -0.08                  | NA              | NA                                  | NA                                     | NA                                    | 0.7831             | 0.0000               | 4.7704          | 59.95        |
|                 |              | AV      | 36.00    | 7.93 | 250.73              | 38.10    | 11.86    | 33.92    | 1.76     | 0.02                 | 22.50                | 1.93                 | 0.45                 | 2.47     | 2.12E+02                        | -0.45                  | <LOD            | <LOD                                | 5.04E-08                               | -1.15E-08                             | 0.8047             | 0.0135               | 4.1882          | 76.31        |
| SD              |              | 0.00    | 0.04     | 2.19 | 1.83                | 0.07     | 0.37     | 0.03     | 0.00     | 0.16                 | 0.32                 | 0.21                 | 0.38                 | 1.83E+02 | 0.32                            | NA                     | NA              | 7.17E-12                            | 1.40E-12                               | 0.0330                                | 0.0234             | 0.8146               | 36.70           |              |

Table continued on next page



**Table S1 (continued)**

| Treat-ment     | Time (weeks) | Setup # | Salinity | pH   | O <sub>2</sub> (µM) | DOC (µM) | DON (µM) | TDN (µM) | TDP (µM) | NO <sub>2</sub> (µM) | NO <sub>3</sub> (µM) | PO <sub>4</sub> (µM) | NH <sub>4</sub> (µM) | DIC (mM) | Cell counts (ml <sup>-1</sup> ) | Bact. Prod. (nM C/day) | Naphth. (µg/L)* | Total Petroleum (µg/L) <sup>#</sup> | Hydrocarbon ox rates                   |                                       | Hydrolysis rates   |                      |                 | TEP (Gxeq/L) |
|----------------|--------------|---------|----------|------|---------------------|----------|----------|----------|----------|----------------------|----------------------|----------------------|----------------------|----------|---------------------------------|------------------------|-----------------|-------------------------------------|----------------------------------------|---------------------------------------|--------------------|----------------------|-----------------|--------------|
|                |              |         |          |      |                     |          |          |          |          |                      |                      |                      |                      |          |                                 |                        |                 |                                     | <sup>14</sup> C Hexadec. rate (nM/day) | <sup>14</sup> C Naphth. rate (nM/day) | Peptidase (nM/day) | Glucosidase (nM/day) | Lipase (nM/day) |              |
| Biotic Control | 0            | 1       | 36       | 7.81 | 239.16              | 45.74    | 10.64    | 34.66    | 1.70     | <LOD                 | 24.02                | 1.47                 | 0.00                 | 3.30     | 2.69E+05                        | 18.23                  | NA              | NA                                  | NA                                     | NA                                    | 0.1008             | 0.0316               | 2.0912          | 60.14        |
|                |              | 2       | 36.5     | 7.8  | 244.79              | 39.31    | 10.35    | 33.53    | 1.70     | <LOD                 | 23.17                | 1.70                 | 0.00                 | 3.38     | 2.72E+05                        | 15.00                  | NA              | NA                                  | NA                                     | NA                                    | 0.1344             | 0.0041               | 1.6131          | 53.74        |
|                |              | 3       | 36       | 7.81 | 241.35              | 42.78    | 11.15    | 34.33    | 1.70     | <LOD                 | 23.17                | 1.52                 | 0.00                 | 2.49     | 2.75E+05                        | 24.65                  | NA              | NA                                  | NA                                     | NA                                    | 0.0374             | 0.0134               | 1.0853          | 62.47        |
|                |              | AV      | 36.17    | 7.81 | 241.76              | 42.61    | 10.72    | 34.17    | 1.70     | <LOD                 | 23.45                | 1.56                 | 0.00                 | 3.06     | 2.72E+05                        | 19.29                  | <LOD            | <LOD                                | 2.93E-07                               | 2.23E-06                              | 0.0909             | 0.0164               | 1.5965          | 58.78        |
|                | SD           | 0.29    | 0.01     | 2.84 | 3.22                | 0.40     | 0.58     | 0.00     | <LOD     | 0.49                 | 0.12                 | 0.00                 | 0.50                 | 2.71E+03 | 4.91                            | NA                     | NA              | 9.47E-11                            | 2.28E-10                               | 0.0492                                | 0.0140             | 0.5031               | 4.52            |              |
|                | 1            | 1       | NA       | 7.87 | 239.16              | 42.56    | 8.83     | 32.93    | 1.81     | 0.02                 | 23.88                | 1.70                 | -0.21                | 2.51     | 2.31E+05                        | 111.83                 | NA              | NA                                  | NA                                     | NA                                    | 0.4636             | 0.2508               | 1.3478          | NA           |
|                |              | 2       | NA       | 7.83 | 243.85              | 37.18    | 10.44    | 34.09    | 1.70     | <LOD                 | 23.77                | 1.70                 | 0.12                 | 2.54     | 2.74E+05                        | 107.13                 | NA              | NA                                  | NA                                     | NA                                    | 0.7525             | 0.2264               | 0.9147          | NA           |
|                |              | 3       | NA       | 7.84 | 244.79              | 38.06    | 11.21    | 34.49    | 1.70     | <LOD                 | 23.40                | 1.65                 | 0.12                 | 2.15     | 2.81E+05                        | 148.24                 | NA              | NA                                  | NA                                     | NA                                    | 0.5226             | 0.2183               | 0.8670          | NA           |
|                |              | AV      | NA       | 7.85 | 242.60              | 39.26    | 10.16    | 33.84    | 1.74     | 0.02                 | 23.68                | 1.68                 | 0.01                 | 2.40     | 2.62E+05                        | 122.40                 | NA              | <LOD                                | 2.21E-07                               | 1.14E-06                              | 0.5796             | 0.2318               | 1.0432          | NA           |
|                | SD           | NA      | 0.02     | 3.01 | 2.89                | 1.22     | 0.81     | 0.06     | <LOD     | 0.25                 | 0.03                 | 0.19                 | 0.22                 | 2.73E+04 | 22.50                           | NA                     | NA              | 1.75E-11                            | 2.50E-10                               | 0.1526                                | 0.0169             | 0.2649               | NA              |              |
|                | 2.5          | 1       | NA       | 7.78 | 248.54              | 37.74    | 12.37    | 33.34    | 1.75     | <LOD                 | 21.55                | 1.70                 | 0.57                 | 2.71     | 2.65E+05                        | 25.57                  | NA              | NA                                  | NA                                     | NA                                    | 0.0339             | 0.0222               | 1.3182          | NA           |
|                |              | 2       | NA       | 7.78 | 252.29              | 37.06    | 13.49    | 34.72    | 1.75     | <LOD                 | 21.27                | 1.75                 | 0.03                 | 2.77     | 2.58E+05                        | 31.19                  | NA              | NA                                  | NA                                     | NA                                    | 0.0563             | 0.0189               | 1.1225          | NA           |
|                |              | 3       | NA       | 7.77 | 253.85              | 33.82    | 13.51    | 33.97    | 1.70     | <LOD                 | 20.73                | 1.75                 | 0.26                 | 2.40     | 2.98E+05                        | 36.29                  | NA              | NA                                  | NA                                     | NA                                    | 0.2108             | 0.0127               | 0.4910          | NA           |
|                |              | AV      | NA       | 7.78 | 251.56              | 36.21    | 13.12    | 34.01    | 1.74     | <LOD                 | 21.18                | 1.73                 | 0.29                 | 2.63     | 2.74E+05                        | 31.02                  | NA              | <LOD                                | 1.38E-07                               | 2.17E-07                              | 0.1003             | 0.0179               | 0.9772          | NA           |
|                | SD           | NA      | 0.01     | 2.73 | 2.09                | 0.65     | 0.69     | 0.03     | <LOD     | 0.42                 | 0.03                 | 0.27                 | 0.20                 | 2.13E+04 | 5.37                            | NA                     | NA              | 2.96E-11                            | 3.63E-11                               | 0.0963                                | 0.0048             | 0.4323               | NA              |              |
|                | 4            | 1       | NA       | 7.8  | 254.48              | 33.06    | 12.70    | 34.05    | 1.79     | 0.02                 | 21.46                | 1.73                 | 0.12                 | 2.43     | 2.20E+05                        | 22.60                  | NA              | NA                                  | NA                                     | NA                                    | 2.1699             | 0.1236               | 0.8441          | NA           |
|                |              | 2       | NA       | 7.78 | 258.86              | 35.98    | 13.77    | 34.74    | 1.74     | 0.02                 | 21.37                | 2.51                 | 0.42                 | 2.43     | 2.81E+05                        | 16.36                  | NA              | NA                                  | NA                                     | NA                                    | 2.2613             | 0.0587               | 1.2422          | NA           |
|                |              | 3       | NA       | 7.76 | 258.54              | 36.65    | 13.35    | 34.08    | 1.74     | 0.02                 | 21.19                | 1.77                 | 0.48                 | 2.57     | 3.17E+05                        | 24.93                  | NA              | NA                                  | NA                                     | NA                                    | 3.3077             | 0.1193               | 0.2646          | NA           |
|                |              | AV      | NA       | 7.78 | 257.29              | 35.23    | 13.27    | 34.29    | 1.76     | 0.02                 | 21.34                | 2.00                 | 0.34                 | 2.48     | 2.72E+05                        | 21.30                  | NA              | <LOD                                | 8.60E-08                               | 8.04E-08                              | 2.5796             | 0.1005               | 0.7836          | NA           |
|                | SD           | NA      | 0.02     | 2.44 | 1.91                | 0.54     | 0.39     | 0.03     | 0.00     | 0.14                 | 0.44                 | 0.19                 | 0.08                 | 4.87E+04 | 4.43                            | NA                     | NA              | 5.00E-11                            | 5.07E-11                               | 0.6322                                | 0.0363             | 0.4916               | NA              |              |
|                | 6            | 1       | 36       | 7.89 | 256.35              | 36.43    | 12.86    | 33.93    | 1.74     | <LOD                 | 21.70                | 1.96                 | 0.63                 | 2.24     | 2.47E+05                        | 27.18                  | NA              | NA                                  | NA                                     | NA                                    | 2.2258             | 0.0951               | 1.6314          | 43.65        |
|                |              | 2       | 36       | 7.85 | 259.17              | 35.41    | 12.62    | 33.42    | 1.69     | <LOD                 | 21.37                | 2.51                 | 0.56                 | 2.41     | 2.83E+05                        | 26.39                  | NA              | NA                                  | NA                                     | NA                                    | 2.8906             | 0.0376               | 1.2506          | 70.42        |
|                |              | 3       | 36       | 7.84 | 256.98              | 35.59    | 13.96    | 35.08    | 1.69     | 0.02                 | 21.74                | 2.33                 | 0.63                 | 2.34     | 2.80E+05                        | 26.57                  | NA              | NA                                  | NA                                     | NA                                    | 3.4509             | 0.0318               | 2.7051          | 58.78        |
|                |              | AV      | 36.00    | 7.86 | 257.50              | 35.81    | 13.15    | 34.14    | 1.71     | 0.02                 | 21.60                | 2.27                 | 0.61                 | 2.33     | 2.70E+05                        | 26.72                  | <LOD            | <LOD                                | 4.82E-08                               | 8.69E-08                              | 2.8557             | 0.0548               | 1.8624          | 57.62        |
| SD             | 0.00         | 0.03    | 1.48     | 0.55 | 0.72                | 0.85     | 0.03     | <LOD     | 0.20     | 0.28                 | 0.04                 | 0.08                 | 2.02E+04             | 0.41     | NA                              | NA                     | 4.40E-12        | 7.98E-11                            | 0.6133                                 | 0.0350                                | 0.7542             | 13.42                |                 |              |

Table continued on next page

Table S1 (continued)

| Treat-ment | Time (weeks) | Setup # | Salinity | pH   | O <sub>2</sub> (μM) | DOC (μM) | DON (μM) | TDN (μM) | TDP (μM) | NO <sub>2</sub> (μM) | NO <sub>3</sub> (μM) | PO <sub>4</sub> (μM) | NH <sub>4</sub> (μM) | DIC (mM) | Cell counts (ml <sup>-1</sup> ) | Bact. Prod. (nM C/day) | Naphth. (μg/L)* | Total Petroleum (μg/L) <sup>#</sup> | Hydrocarbon ox rates                   |                                       | Hydrolysis rates   |                      |                 | TEP (Gxeq/L) |
|------------|--------------|---------|----------|------|---------------------|----------|----------|----------|----------|----------------------|----------------------|----------------------|----------------------|----------|---------------------------------|------------------------|-----------------|-------------------------------------|----------------------------------------|---------------------------------------|--------------------|----------------------|-----------------|--------------|
|            |              |         |          |      |                     |          |          |          |          |                      |                      |                      |                      |          |                                 |                        |                 |                                     | <sup>14</sup> C Hexadec. rate (nM/day) | <sup>14</sup> C Naphth. rate (nM/day) | Peptidase (nM/day) | Glucosidase (nM/day) | Lipase (nM/day) |              |
| WAF        | 0            | 1       | 36       | 7.82 | 244.79              | 116.47   | 11.69    | 35.22    | 1.65     | <LOD                 | 23.53                | 1.70                 | 0.00                 | 2.35     | 2.69E+05                        | 15.51                  | NA              | NA                                  | NA                                     | NA                                    | 0.0143             | 0.1527               | 3.0516          | 111.36       |
|            |              | 2       | 36.5     | 7.83 | 241.97              | 114.81   | 12.70    | 35.82    | 1.65     | <LOD                 | 23.11                | 1.70                 | 0.00                 | 2.65     | 2.58E+05                        | 20.71                  | NA              | NA                                  | NA                                     | NA                                    | 0.0185             | 0.1039               | 2.6514          | 130.56       |
|            |              | 3       | 36.5     | 7.82 | 246.04              | 114.93   | 10.20    | 33.03    | 1.50     | <LOD                 | 22.99                | 1.52                 | 0.16                 | 2.80     | 2.72E+05                        | 11.99                  | NA              | NA                                  | NA                                     | NA                                    | 0.0562             | 0.1027               | 2.8798          | 96.81        |
|            |              | AV      | 36.33    | 7.82 | 244.27              | 115.41   | 11.53    | 34.69    | 1.60     | <LOD                 | 23.21                | 1.64                 | 0.05                 | 2.60     | 2.66E+05                        | 16.07                  | 29.26           | 144.5768                            | 5.47E-04                               | 1.47E-01                              | 0.0297             | 0.1198               | 2.8609          | 112.91       |
|            |              | SD      | 0.29     | 0.01 | 2.08                | 0.93     | 1.26     | 1.46     | 0.09     | <LOD                 | 0.28                 | 0.11                 | 0.09                 | 0.23     | 7.68E+03                        | 4.39                   | NA              | NA                                  | 2.20E-07                               | 3.91E-05                              | 0.0231             | 0.0285               | 0.2008          | 16.93        |
|            | 1            | 1       | NA       | 7.81 | 244.79              | 116.04   | 8.20     | 24.87    | 1.15     | 0.08                 | 16.71                | 1.10                 | 0.12                 | 2.17     | 3.17E+06                        | 1172.23                | NA              | NA                                  | NA                                     | NA                                    | 3.5015             | 0.2790               | 24.5962         | 1118.99      |
|            |              | 2       | NA       | 7.79 | 244.79              | 117.77   | 8.83     | 25.80    | 1.15     | 0.08                 | 16.92                | 1.10                 | 0.04                 | 1.95     | 3.95E+06                        | 1015.92                | NA              | NA                                  | NA                                     | NA                                    | 3.6320             | 0.3109               | 22.2411         | 1043.80      |
|            |              | 3       | NA       | 7.77 | 256.35              | 120.79   | 9.84     | 26.80    | 1.15     | 0.10                 | 17.14                | 1.15                 | 0.28                 | 2.39     | 4.07E+06                        | 904.97                 | NA              | NA                                  | NA                                     | NA                                    | 3.2426             | 0.1990               | 21.0067         | 789.58       |
|            |              | AV      | NA       | 7.79 | 248.64              | 118.20   | 8.96     | 25.82    | 1.15     | 0.08                 | 16.93                | 1.12                 | 0.14                 | 2.17     | 3.73E+06                        | 1031.04                | 97.40           | 330.1361                            | 5.92E-03                               | 8.16E+01                              | 3.4587             | 0.2630               | 22.6147         | 984.12       |
|            |              | SD      | NA       | 0.02 | 6.68                | 2.40     | 0.83     | 0.97     | 0.00     | 0.01                 | 0.21                 | 0.03                 | 0.12                 | 0.22     | 4.86E+05                        | 134.27                 | NA              | NA                                  | 6.63E-07                               | 3.06E-02                              | 0.1982             | 0.0576               | 1.8236          | 172.62       |
|            | 2.5          | 1       | NA       | 7.76 | 254.48              | 103.46   | 11.43    | 26.70    | 1.35     | 0.14                 | 15.78                | 1.33                 | 0.65                 | 2.41     | 5.26E+06                        | 1739.87                | NA              | NA                                  | NA                                     | NA                                    | 25.0372            | 0.2581               | 37.1217         | 942.84       |
|            |              | 2       | NA       | 7.71 | 255.10              | 110.99   | 8.64     | 20.40    | 0.90     | 0.04                 | 11.91                | 0.92                 | 0.19                 | 2.25     | 6.81E+06                        | 2806.81                | NA              | NA                                  | NA                                     | NA                                    | 51.9985            | 0.4505               | 41.8060         | 673.18       |
|            |              | 3       | NA       | 7.61 | 252.60              | 107.66   | 6.20     | 9.47     | 0.25     | 0.04                 | 3.81                 | 0.23                 | 0.57                 | 2.46     | 1.36E+07                        | 4193.74                | NA              | NA                                  | NA                                     | NA                                    | 85.4897            | NA                   | 66.1001         | 5179.80      |
|            |              | AV      | NA       | 7.69 | 254.06              | 107.37   | 8.76     | 18.86    | 0.83     | 0.07                 | 10.50                | 0.83                 | 0.47                 | 2.37     | 8.56E+06                        | 2913.47                | 97.83           | 362.5801                            | 1.83E-03                               | 1.54E+01                              | 54.1751            | 0.3543               | 48.3426         | 2265.27      |
|            |              | SD      | NA       | 0.08 | 1.30                | 3.77     | 2.62     | 8.72     | 0.56     | 0.06                 | 6.11                 | 0.56                 | 0.25                 | 0.11     | 4.45E+06                        | 1230.41                | NA              | NA                                  | 2.43E-07                               | 8.11E-03                              | 30.2850            | 0.1360               | 15.5558         | 2527.65      |
|            | 4            | 1       | NA       | 7.72 | 258.54              | 112.92   | 10.05    | 23.82    | 1.24     | 0.28                 | 14.20                | 1.49                 | 0.72                 | 2.64     | 6.28E+06                        | 1766.63                | NA              | NA                                  | NA                                     | NA                                    | 41.9813            | 0.3372               | 43.3329         | 784.08       |
|            |              | 2       | NA       | 7.6  | 254.48              | 115.06   | 7.85     | 12.18    | 0.54     | 0.20                 | 4.31                 | 0.57                 | 0.18                 | 2.80     | 1.06E+07                        | 2584.77                | NA              | NA                                  | NA                                     | NA                                    | 93.1423            | 0.5480               | 44.9155         | 5231.53      |
|            |              | 3       | NA       | 7.69 | 256.67              | 106.43   | 11.40    | 25.10    | 1.24     | 0.28                 | 13.95                | 1.73                 | 0.54                 | 2.49     | 5.59E+06                        | 1050.51                | NA              | NA                                  | NA                                     | NA                                    | 34.5729            | 0.3225               | 41.4434         | 1400.68      |
|            |              | AV      | NA       | 7.67 | 256.56              | 111.47   | 9.77     | 20.37    | 1.01     | 0.25                 | 10.82                | 1.26                 | 0.48                 | 2.64     | 7.49E+06                        | 1800.64                | 119.44          | 204.1767                            | 8.57E-04                               | 2.90E+00                              | 56.5655            | 0.4026               | 43.2306         | 2472.10      |
|            |              | SD      | NA       | 0.06 | 2.03                | 4.49     | 1.80     | 7.12     | 0.41     | 0.05                 | 5.64                 | 0.61                 | 0.27                 | 0.16     | 2.72E+06                        | 767.70                 | NA              | NA                                  | 4.97E-07                               | 4.38E-03                              | 31.8923            | 0.1261               | 1.7383          | 2409.54      |
|            | 6            | 1       | 36       | 7.49 | 245.41              | 109.07   | 11.88    | 9.20     | 0.29     | 0.02                 | 0.66                 | 0.34                 | 3.36                 | 2.28     | 1.77E+07                        | 2435.14                | NA              | NA                                  | NA                                     | NA                                    | 47.3926            | 2.0004               | 58.8381         | 5695.84      |
|            |              | 2       | 36       | 7.45 | 249.48              | 110.07   | 7.02     | 10.34    | 0.54     | 0.77                 | 3.46                 | 0.52                 | 0.91                 | 2.22     | 1.65E+07                        | 4329.12                | NA              | NA                                  | NA                                     | NA                                    | 72.0829            | 0.8366               | 76.9911         | 2374.88      |
|            |              | 3       | 36       | 7.42 | 253.23              | 108.30   | 4.96     | 7.83     | 0.44     | 0.87                 | 2.22                 | 0.43                 | 0.21                 | 2.40     | 1.32E+07                        | 4173.04                | NA              | NA                                  | NA                                     | NA                                    | 63.9006            | 0.5546               | 76.1746         | 3085.41      |
|            |              | AV      | 36.00    | 7.45 | 249.37              | 109.15   | 7.96     | 9.12     | 0.42     | 0.55                 | 2.11                 | 0.43                 | 1.50                 | 2.30     | 1.58E+07                        | 3645.76                | 216.45          | 495.2513                            | 7.19E-04                               | 1.24E+01                              | 61.1254            | 1.1305               | 70.6680         | 3718.71      |
| SD         |              | 0.00    | 0.04     | 3.91 | 0.89                | 3.56     | 1.25     | 0.13     | 0.47     | 1.40                 | 0.09                 | 1.65                 | 0.09                 | 2.33E+06 | 1051.33                         | NA                     | NA              | 1.14E-07                            | 6.30E-03                               | 12.5770                               | 0.7664             | 10.2530              | 1748.71         |              |

Table continued on next page

**Table S1 (continued)**

| Treat-ment      | Time (weeks) | Setup # | Salinity | pH    | O <sub>2</sub> (μM) | DOC (μM) | DON (μM) | TDN (μM) | TDP (μM) | NO <sub>2</sub> (μM) | NO <sub>3</sub> (μM) | PO <sub>4</sub> (μM) | NH <sub>4</sub> (μM) | DIC (mM) | Cell counts (ml <sup>-1</sup> ) | Bact. Prod. (nM C/day) | Naphth. (μg/L)* | Total Petroleum (μg/L) <sup>#</sup> | Hydrocarbon ox rates                   |                                       | Hydrolysis rates   |                      |                 | TEP (Gxeq/L) |
|-----------------|--------------|---------|----------|-------|---------------------|----------|----------|----------|----------|----------------------|----------------------|----------------------|----------------------|----------|---------------------------------|------------------------|-----------------|-------------------------------------|----------------------------------------|---------------------------------------|--------------------|----------------------|-----------------|--------------|
|                 |              |         |          |       |                     |          |          |          |          |                      |                      |                      |                      |          |                                 |                        |                 |                                     | <sup>14</sup> C Hexadec. rate (nM/day) | <sup>14</sup> C Naphth. rate (nM/day) | Peptidase (nM/day) | Glucosidase (nM/day) | Lipase (nM/day) |              |
| Dispersant-only | 0            | 1       | 36       | 7.86  | 241.66              | 254.71   | 9.38     | 32.80    | 1.70     | <LOD                 | 23.42                | 1.61                 | 0.00                 | 3.03     | 2.96E+05                        | 16.82                  | NA              | NA                                  | NA                                     | NA                                    | 0.6655             | 0.3663               | 2.7746          | NA           |
|                 |              | 2       | 36       | 7.85  | 246.35              | 248.48   | 10.17    | 33.82    | 1.75     | 0.02                 | 23.63                | 1.65                 | 0.00                 | 2.81     | 2.75E+05                        | 17.01                  | NA              | NA                                  | NA                                     | NA                                    | 0.1703             | 0.1602               | 4.3518          | NA           |
|                 |              | 3       | 36.5     | 7.84  | 254.79              | 239.18   | 10.01    | 32.85    | 1.75     | 0.18                 | 22.90                | 1.61                 | 0.24                 | 3.21     | 2.55E+05                        | 14.96                  | NA              | NA                                  | NA                                     | NA                                    | 0.1597             | 0.1603               | 1.9005          | NA           |
|                 |              | AV      | 36.17    | 7.85  | 247.60              | 247.46   | 9.86     | 33.16    | 1.74     | 0.10                 | 23.32                | 1.62                 | 0.08                 | 3.02     | 2.75E+05                        | 16.26                  | <LOD            | <LOD                                | 1.51E-07                               | 2.18E-06                              | 0.3318             | 0.2289               | 3.0090          | NA           |
|                 | SD           | 0.29    | 0.01     | 6.65  | 7.82                | 0.42     | 0.57     | 0.03     | 0.11     | 0.38                 | 0.03                 | 0.14                 | 0.20                 | 2.06E+04 | 1.13                            | NA                     | NA              | 4.97E-11                            | 6.09E-11                               | 0.2890                                | 0.1189             | 1.2423               | NA              |              |
|                 | 1            | 1       | NA       | 7.81  | 246.66              | 276.34   | 11.59    | 28.85    | 1.35     | 0.36                 | 16.70                | 1.15                 | -0.21                | 2.90     | 3.05E+06                        | 1645.89                | NA              | NA                                  | NA                                     | NA                                    | 23.9905            | 0.8174               | 36.4414         | NA           |
|                 |              | 2       | NA       | 7.81  | 247.29              | 263.28   | 8.88     | 27.66    | 1.35     | 0.20                 | 18.45                | 1.24                 | -0.13                | 2.73     | 3.44E+06                        | 1027.83                | NA              | NA                                  | NA                                     | NA                                    | 21.3513            | 0.7154               | 27.9985         | NA           |
|                 |              | 3       | NA       | 7.81  | 248.54              | 291.81   | 10.08    | 28.30    | 1.40     | 0.20                 | 18.06                | 1.20                 | 0.04                 | 2.75     | 3.19E+06                        | 580.50                 | NA              | NA                                  | NA                                     | NA                                    | 6.9255             | 0.7154               | 32.2631         | NA           |
|                 |              | AV      | NA       | 7.81  | 247.50              | 277.14   | 10.18    | 28.27    | 1.37     | 0.25                 | 17.74                | 1.20                 | -0.10                | 2.79     | 3.23E+06                        | 1084.74                | <LOD            | <LOD                                | 1.01E-06                               | 2.01E-06                              | 17.4224            | 0.7494               | 32.2344         | NA           |
|                 | SD           | NA      | 0.00     | 0.96  | 14.28               | 1.36     | 0.60     | 0.03     | 0.09     | 0.92                 | 0.05                 | 0.12                 | 0.09                 | 2.01E+05 | 534.97                          | NA                     | NA              | 2.49E-10                            | 8.73E-10                               | 9.1859                                | 0.0589             | 4.2215               | NA              |              |
|                 | 2.5          | 1       | NA       | 7.82  | 247.29              | 245.46   | 11.07    | 27.37    | 1.39     | 0.50                 | 16.13                | 1.22                 | 0.34                 | 2.53     | 5.71E+06                        | 1934.87                | NA              | NA                                  | NA                                     | NA                                    | 44.9211            | 0.4628               | 30.7263         | NA           |
|                 |              | 2       | NA       | 7.81  | 250.10              | 248.92   | 12.75    | 29.07    | 1.39     | 0.18                 | 16.40                | 1.22                 | 0.26                 | 2.61     | 9.51E+06                        | 1586.52                | NA              | NA                                  | NA                                     | NA                                    | 42.0186            | 0.4852               | 43.1595         | NA           |
|                 |              | 3       | NA       | 7.81  | 254.17              | 246.76   | 10.25    | 27.24    | 1.44     | 0.22                 | 16.87                | 1.26                 | 0.11                 | 2.69     | 6.05E+06                        | 1024.90                | NA              | NA                                  | NA                                     | NA                                    | 34.3311            | 0.4850               | 35.0384         | NA           |
|                 |              | AV      | NA       | 7.81  | 250.52              | 247.05   | 11.36    | 27.89    | 1.41     | 0.30                 | 16.47                | 1.23                 | 0.24                 | 2.61     | 7.09E+06                        | 1515.43                | <LOD            | <LOD                                | 3.48E-07                               | 8.92E-07                              | 40.4236            | 0.4777               | 36.3081         | NA           |
|                 | SD           | NA      | 0.01     | 3.46  | 1.74                | 1.27     | 1.02     | 0.03     | 0.18     | 0.38                 | 0.03                 | 0.12                 | 0.08                 | 2.10E+06 | 459.13                          | NA                     | NA              | 6.47E-11                            | 1.44E-10                               | 5.4722                                | 0.0129             | 6.3131               | NA              |              |
|                 | 4            | 1       | NA       | 7.83  | 260.11              | 254.52   | 9.53     | 26.89    | 1.29     | 0.36                 | 17.59                | 1.45                 | 0.60                 | 2.44     | 7.79E+06                        | 862.61                 | NA              | NA                                  | NA                                     | NA                                    | 94.6429            | 1.3547               | 20.9727         | NA           |
|                 |              | 2       | NA       | 7.81  | 257.92              | 258.87   | 8.90     | 26.02    | 1.39     | 0.24                 | 17.54                | 1.22                 | 0.66                 | 2.25     | 6.11E+06                        | 1142.06                | NA              | NA                                  | NA                                     | NA                                    | 56.1639            | 0.8821               | 23.1232         | NA           |
|                 |              | 3       | NA       | 7.79  | 255.42              | 246.46   | 10.24    | 26.60    | 1.34     | 0.57                 | 16.64                | 1.45                 | 0.84                 | 2.55     | 7.75E+06                        | 726.34                 | NA              | NA                                  | NA                                     | NA                                    | 91.4419            | 0.8817               | 24.3932         | NA           |
|                 |              | AV      | NA       | 7.81  | 257.81              | 253.29   | 9.55     | 26.50    | 1.34     | 0.39                 | 17.26                | 1.37                 | 0.70                 | 2.42     | 7.22E+06                        | 910.34                 | <LOD            | <LOD                                | 1.15E-07                               | 4.13E-07                              | 80.7496            | 1.0395               | 22.8297         | NA           |
|                 | SD           | NA      | 0.02     | 2.35  | 6.29                | 0.67     | 0.44     | 0.05     | 0.16     | 0.54                 | 0.13                 | 0.12                 | 0.15                 | 9.57E+05 | 211.93                          | NA                     | NA              | 6.57E-11                            | 1.58E-10                               | 21.3519                               | 0.2729             | 1.7290               | NA              |              |
|                 | 6            | 1       | 36       | 7.7   | 255.73              | 367.23   | 12.37    | 23.53    | 1.39     | 0.40                 | 11.67                | 0.99                 | 0.91                 | 2.40     | 8.85E+06                        | 1899.17                | NA              | NA                                  | NA                                     | NA                                    | 67.8496            | 0.5450               | 71.4920         | NA           |
|                 |              | 2       | 36.5     | 7.67  | 258.54              | 314.91   | 11.68    | 23.01    | 1.24     | 0.40                 | 12.33                | 0.99                 | 1.40                 | 2.41     | 1.03E+07                        | 774.12                 | NA              | NA                                  | NA                                     | NA                                    | 90.3962            | 0.9669               | 42.3501         | NA           |
|                 |              | 3       | 36       | 7.73  | 248.85              | 228.27   | 16.39    | 32.24    | 1.64     | 0.48                 | 16.84                | 1.54                 | 1.47                 | 2.31     | 4.71E+06                        | 132.40                 | NA              | NA                                  | NA                                     | NA                                    | 26.2752            | 0.9667               | 12.3098         | NA           |
|                 |              | AV      | 36.17    | 7.70  | 254.37              | 303.47   | 13.48    | 26.26    | 1.43     | 0.43                 | 13.61                | 1.17                 | 1.26                 | 2.37     | 7.96E+06                        | 935.23                 | 0.73            | <LOD                                | 8.01E-08                               | 2.38E-07                              | 61.5070            | 0.8262               | 42.0506         | NA           |
| SD              | 0.29         | 0.03    | 4.99     | 70.18 | 2.54                | 5.18     | 0.20     | 0.05     | 2.81     | 0.32                 | 0.30                 | 0.06                 | 2.91E+06             | 894.34   | NA                              | NA                     | 3.75E-11        | 1.50E-10                            | 32.5276                                | 0.2435                                | 29.5922            | NA                   |                 |              |

Table continued on next page

**Table S1 (continued)**

| Treat-ment | Time (weeks) | Setup # | Salinity | pH   | O <sub>2</sub> (μM) | DOC (μM) | DON (μM) | TDN (μM) | TDP (μM) | NO <sub>2</sub> (μM) | NO <sub>3</sub> (μM) | PO <sub>4</sub> (μM) | NH <sub>4</sub> (μM) | DIC (mM) | Cell counts (ml <sup>-1</sup> ) | Bact. Prod. (nM C/day) | Naphth. (μg/L)* | Total Petroleum (μg/L) <sup>#</sup> | Hydrocarbon ox rates                   |                                       | Hydrolysis rates   |                      |                 | TEP (Gxeq/L) |
|------------|--------------|---------|----------|------|---------------------|----------|----------|----------|----------|----------------------|----------------------|----------------------|----------------------|----------|---------------------------------|------------------------|-----------------|-------------------------------------|----------------------------------------|---------------------------------------|--------------------|----------------------|-----------------|--------------|
|            |              |         |          |      |                     |          |          |          |          |                      |                      |                      |                      |          |                                 |                        |                 |                                     | <sup>14</sup> C Hexadec. rate (nM/day) | <sup>14</sup> C Naphth. rate (nM/day) | Peptidase (nM/day) | Glucosidase (nM/day) | Lipase (nM/day) |              |
| CEWAF      | 0            | 1       | 36       | 7.83 | 252.60              | 283.30   | 9.11     | 32.67    | 1.70     | <LOD                 | 23.72                | 1.65                 | 0.16                 | 2.74     | 2.72E+05                        | 22.47                  | NA              | NA                                  | NA                                     | NA                                    | 0.3915             | 0.1622               | 2.0371          | NA           |
|            |              | 2       | 36       | 7.83 | 247.60              | 293.41   | 10.03    | 33.26    | 1.70     | <LOD                 | 23.24                | 1.65                 | 0.00                 | 2.88     | 2.63E+05                        | 15.53                  | NA              | NA                                  | NA                                     | NA                                    | 0.2391             | 0.1559               | 3.4320          | NA           |
|            |              | 3       | 36.5     | 7.84 | 240.10              | 272.95   | 11.28    | 34.33    | 1.70     | <LOD                 | 23.04                | 1.47                 | 0.00                 | 3.17     | 2.98E+05                        | 22.02                  | NA              | NA                                  | NA                                     | NA                                    | 0.1751             | 0.1387               | 3.0062          | NA           |
|            |              | AV      | 36.17    | 7.83 | 246.77              | 283.22   | 10.14    | 33.42    | 1.70     | <LOD                 | 23.33                | 1.59                 | 0.05                 | 2.93     | 2.77E+05                        | 20.01                  | 4.06            | 13.3809                             | 4.33E-04                               | 1.10E+00                              | 0.2686             | 0.1523               | 2.8251          | NA           |
|            | SD           | 0.29    | 0.01     | 6.29 | 10.23               | 1.09     | 0.84     | 0.00     | <LOD     | 0.35                 | 0.11                 | 0.09                 | 0.22                 | 1.83E+04 | 3.88                            | NA                     | NA              | 1.51E-07                            | 5.08E-04                               | 0.1112                                | 0.0122             | 0.7149               | NA              |              |
|            | 1            | 1       | NA       | 7.8  | 251.98              | 275.85   | 10.10    | 31.33    | 1.55     | 0.06                 | 21.29                | 1.56                 | 0.12                 | 2.51     | 1.11E+06                        | 1470.49                | NA              | NA                                  | NA                                     | NA                                    | 11.8685            | 0.2565               | 12.4461         | NA           |
|            |              | 2       | NA       | 7.85 | 250.41              | 257.24   | 12.47    | 33.16    | 1.60     | 0.18                 | 20.71                | 1.52                 | 0.20                 | 3.06     | 1.22E+06                        | 895.73                 | NA              | NA                                  | NA                                     | NA                                    | 11.6617            | 0.2475               | 9.4389          | NA           |
|            |              | 3       | NA       | 7.84 | 241.97              | 245.34   | 10.00    | 29.26    | 1.50     | 0.52                 | 18.86                | 1.42                 | 0.12                 | 2.41     | 1.79E+06                        | 1603.53                | NA              | NA                                  | NA                                     | NA                                    | 7.7185             | 0.2695               | 12.8431         | NA           |
|            |              | AV      | NA       | 7.83 | 248.12              | 259.47   | 10.86    | 31.25    | 1.55     | 0.25                 | 20.28                | 1.50                 | 0.14                 | 2.66     | 1.38E+06                        | 1323.25                | 5.39            | 29.0554                             | 3.70E-04                               | 3.75E+00                              | 10.4163            | 0.2578               | 11.5760         | NA           |
|            | SD           | NA      | 0.03     | 5.38 | 15.38               | 1.40     | 1.95     | 0.05     | 0.24     | 1.27                 | 0.07                 | 0.05                 | 0.35                 | 3.65E+05 | 376.17                          | NA                     | NA              | 8.43E-08                            | 8.37E-04                               | 2.3386                                | 0.0110             | 1.8614               | NA              |              |
|            | 2.5          | 1       | NA       | 7.79 | 254.48              | 218.66   | 13.09    | 29.56    | 1.59     | 0.32                 | 17.11                | 1.45                 | 0.96                 | 2.43     | 2.99E+06                        | 1838.80                | NA              | NA                                  | NA                                     | NA                                    | 11.8325            | 0.0818               | 12.8214         | NA           |
|            |              | 2       | NA       | 7.83 | 249.48              | 238.13   | 12.89    | 29.01    | 1.39     | 0.65                 | 16.29                | 1.40                 | 0.81                 | 2.51     | 2.78E+06                        | 1265.62                | NA              | NA                                  | NA                                     | NA                                    | 11.6748            | 0.0726               | 17.4776         | NA           |
|            |              | 3       | NA       | 7.85 | 246.04              | 209.90   | 11.82    | 29.17    | 1.49     | 0.32                 | 17.52                | 1.45                 | 0.50                 | 2.63     | 2.08E+06                        | 1144.99                | NA              | NA                                  | NA                                     | NA                                    | 11.6823            | 0.2565               | 11.4883         | NA           |
|            |              | AV      | NA       | 7.82 | 250.00              | 222.23   | 12.60    | 29.25    | 1.49     | 0.43                 | 16.97                | 1.43                 | 0.76                 | 2.52     | 2.62E+06                        | 1416.47                | 6.70            | 31.3638                             | 5.62E-05                               | 2.70E+00                              | 11.7299            | 0.1370               | 13.9291         | NA           |
|            | SD           | NA      | 0.03     | 4.24 | 14.45               | 0.68     | 0.28     | 0.10     | 0.19     | 0.63                 | 0.03                 | 0.24                 | 0.10                 | 4.72E+05 | 370.69                          | NA                     | NA              | 1.44E-08                            | 2.62E-04                               | 0.0890                                | 0.1036             | 3.1446               | NA              |              |
|            | 4            | 1       | NA       | 7.8  | 256.98              | 248.04   | 14.89    | 32.79    | 1.64     | 0.54                 | 18.67                | 2.33                 | 1.31                 | 2.50     | 6.45E+05                        | 134.91                 | NA              | NA                                  | NA                                     | NA                                    | 13.2578            | 0.1326               | 5.5864          | NA           |
|            |              | 2       | NA       | 7.82 | 255.10              | 257.04   | 12.27    | 30.25    | 1.59     | 0.24                 | 19.06                | 1.82                 | 1.31                 | 2.32     | 1.37E+06                        | 427.34                 | NA              | NA                                  | NA                                     | NA                                    | 9.0568             | 0.1711               | 6.6798          | NA           |
|            |              | 3       | NA       | 7.85 | 255.10              | 247.03   | 12.84    | 30.45    | 2.20     | 0.28                 | 19.00                | 2.10                 | 1.67                 | 2.30     | 9.94E+05                        | 453.31                 | NA              | NA                                  | NA                                     | NA                                    | 13.0938            | 0.1563               | 7.1715          | NA           |
|            |              | AV      | NA       | 7.82 | 255.73              | 250.70   | 13.33    | 31.16    | 1.81     | 0.35                 | 18.91                | 2.08                 | 1.43                 | 2.38     | 1.00E+06                        | 338.52                 | 4.22            | 23.7917                             | 2.11E-05                               | 6.65E-02                              | 11.8028            | 0.1533               | 6.4792          | NA           |
|            | SD           | NA      | 0.03     | 1.08 | 5.51                | 1.38     | 1.41     | 0.33     | 0.17     | 0.21                 | 0.25                 | 0.21                 | 0.11                 | 3.61E+05 | 176.81                          | NA                     | NA              | 9.91E-09                            | 6.75E-05                               | 2.3795                                | 0.0194             | 0.8114               | NA              |              |
|            | 6            | 1       | 36.5     | 7.73 | 255.10              | 242.43   | 15.94    | 31.41    | 1.64     | 0.77                 | 17.35                | 1.68                 | 2.66                 | 2.39     | 1.76E+06                        | 352.81                 | NA              | NA                                  | NA                                     | NA                                    | 19.5602            | 0.1840               | 9.4406          | NA           |
|            |              | 2       | 36       | 7.76 | 255.73              | 244.76   | 14.82    | 29.87    | 1.64     | 0.48                 | 16.66                | 1.96                 | 2.10                 | 2.60     | 1.69E+06                        | 449.28                 | NA              | NA                                  | NA                                     | NA                                    | 22.7649            | 0.1516               | 10.3978         | NA           |
|            |              | 3       | 36       | 7.78 | 251.98              | 229.59   | 17.16    | 31.11    | 1.64     | 0.69                 | 15.86                | 2.10                 | 2.59                 | 2.76     | 1.20E+06                        | 232.15                 | NA              | NA                                  | NA                                     | NA                                    | 20.4731            | 0.1615               | 12.5474         | NA           |
|            |              | AV      | 36.17    | 7.76 | 254.27              | 238.93   | 15.97    | 30.80    | 1.64     | 0.65                 | 16.63                | 1.91                 | 2.45                 | 2.58     | 1.55E+06                        | 344.75                 | 5.74            | 29.5089                             | 6.83E-06                               | 1.95E-01                              | 20.9327            | 0.1657               | 10.7953         | NA           |
| SD         | 0.29         | 0.03    | 2.01     | 8.17 | 1.17                | 0.82     | 0.00     | 0.15     | 0.75     | 0.21                 | 0.30                 | 0.18                 | 3.06E+05             | 108.79   | NA                              | NA                     | 2.19E-09        | 5.87E-05                            | 1.6510                                 | 0.0166                                | 1.5911             | NA                   |                 |              |

Table continued on next page

**Table S1 (continued)**

| Treat-ment      | Time (weeks) | Setup # | Salinity | pH    | O <sub>2</sub> (μM) | DOC (μM) | DON (μM) | TDN (μM) | TDP (μM) | NO <sub>2</sub> (μM) | NO <sub>3</sub> (μM) | PO <sub>4</sub> (μM) | NH <sub>4</sub> (μM) | DIC (mM) | Cell counts (ml <sup>-1</sup> ) | Bact. Prod. (nM C/day) | Naphth. (μg/L)* | Total Petroleum (μg/L)# | Hydrocarbon ox rates                   |                                       | Hydrolysis rates   |                      |                 | TEP (Gxeq/L) |         |    |
|-----------------|--------------|---------|----------|-------|---------------------|----------|----------|----------|----------|----------------------|----------------------|----------------------|----------------------|----------|---------------------------------|------------------------|-----------------|-------------------------|----------------------------------------|---------------------------------------|--------------------|----------------------|-----------------|--------------|---------|----|
|                 |              |         |          |       |                     |          |          |          |          |                      |                      |                      |                      |          |                                 |                        |                 |                         | <sup>14</sup> C Hexadec. rate (nM/day) | <sup>14</sup> C Naphth. rate (nM/day) | Peptidase (nM/day) | Glucosidase (nM/day) | Lipase (nM/day) |              |         |    |
| CEWAF-nutrients | 0            | 1       | 36       | 7.61  | 246.66              | 267.16   | 35.32    | 56.51    | 1.05     | 0.02                 | 31.62                | 1.15                 | 10.45                | 2.17     | 2.76E+05                        | 18.08                  | NA              | NA                      | NA                                     | NA                                    | 1.4302             | 0.1419               | 2.2470          | NA           |         |    |
|                 |              | 2       | 36       | 7.59  | 246.04              | 268.27   | 35.58    | 57.62    | 1.10     | <LOD                 | 32.89                | 1.15                 | 10.85                | 2.41     | 2.85E+05                        | 17.58                  | NA              | NA                      | NA                                     | NA                                    | 0.0387             | 0.1772               | 3.6246          | NA           |         |    |
|                 |              | 3       | 36       | 7.58  | 248.54              | 276.22   | 37.03    | 57.71    | 1.10     | <LOD                 | 32.02                | 1.15                 | 11.34                | 2.32     | 2.81E+05                        | 13.38                  | NA              | NA                      | NA                                     | NA                                    | 0.1821             | 0.1322               | 1.8679          | NA           |         |    |
|                 |              | AV      | 36.00    | 7.59  | 247.08              | 270.55   | 35.98    | 57.28    | 1.09     | 0.02                 | 32.18                | 1.15                 | 10.88                | 2.30     | 2.81E+05                        | 16.35                  | 4.84            | 22.7081                 | 4.87E-04                               | 2.06E+00                              | 0.5503             | 0.1504               | 2.5798          | NA           |         |    |
|                 |              | SD      | 0.00     | 0.02  | 1.30                | 4.94     | 0.92     | 0.67     | 0.03     | <LOD                 | 0.65                 | 0.00                 | 0.45                 | 0.12     | 4.77E+03                        | 2.59                   | NA              | NA                      | 1.18E-07                               | 2.73E-04                              | 0.7653             | 0.0237               | 0.9244          | NA           |         |    |
|                 | 1            | 1       | NA       | 7.65  | 247.29              | 280.16   | 34.45    | 56.93    | 0.95     | <LOD                 | 30.66                | 0.97                 | 8.18                 | 2.53     | 1.09E+06                        | 963.77                 | NA              | NA                      | NA                                     | NA                                    | 3.9344             | 0.2268               | 5.6393          | NA           |         |    |
|                 |              | 2       | NA       | 76    | 248.23              | 253.72   | 34.56    | 56.91    | 0.95     | <LOD                 | 31.02                | 0.97                 | 8.67                 | 2.18     | 1.39E+06                        | 653.27                 | NA              | NA                      | NA                                     | NA                                    | 4.2710             | 0.3311               | 6.0422          | NA           |         |    |
|                 |              | 3       | NA       | 7.55  | 239.78              | 262.10   | 33.40    | 56.39    | 0.85     | <LOD                 | 30.61                | 0.87                 | 7.61                 | 2.55     | 1.67E+06                        | 1217.30                | NA              | NA                      | NA                                     | NA                                    | 5.7223             | 0.2882               | 8.0707          | NA           |         |    |
|                 |              | AV      | NA       | 30.40 | 245.10              | 265.33   | 34.14    | 56.74    | 0.92     | <LOD                 | 30.76                | 0.94                 | 8.15                 | 2.42     | 1.38E+06                        | 944.78                 | 16.55           | 31.7392                 | 2.84E-04                               | 4.75E+00                              | 4.6426             | 0.2820               | 6.5840          | NA           |         |    |
|                 |              | SD      | NA       | 39.49 | 4.63                | 13.51    | 0.64     | 0.31     | 0.06     | <LOD                 | 0.23                 | 0.05                 | 0.53                 | 0.21     | 2.93E+05                        | 282.49                 | NA              | NA                      | 5.43E-08                               | 7.63E-04                              | 0.9501             | 0.0525               | 1.3031          | NA           |         |    |
|                 | 2.5          | AV      | NA       | NA    | NA                  | NA       | NA       | NA       | NA       | NA                   | NA                   | NA                   | NA                   | NA       | 22.93                           | NA                     | 3.58E+06        | 2351.78                 | NA                                     | NA                                    | 2.65E-04           | 2.20E+00             | 18.1345         | 0.2018       | 19.8446 | NA |
|                 |              | SD      | NA       | NA    | NA                  | NA       | NA       | NA       | NA       | NA                   | NA                   | NA                   | NA                   | NA       | NA                              | NA                     | NA              | NA                      | NA                                     | 5.27E-08                              | 3.15E-05           | NA                   | NA              | NA           | NA      |    |
|                 | 4            | AV      | NA       | NA    | NA                  | NA       | NA       | NA       | NA       | NA                   | NA                   | NA                   | NA                   | 15.82    | NA                              | 2.91E+06               | 803.02          | NA                      | NA                                     | 1.12E-04                              | 3.14E-01           | NA                   | NA              | NA           | NA      |    |
|                 |              | SD      | NA       | NA    | NA                  | NA       | NA       | NA       | NA       | NA                   | NA                   | NA                   | NA                   | NA       | NA                              | NA                     | NA              | NA                      | NA                                     | 9.18E-08                              | 7.39E-05           | NA                   | NA              | NA           | NA      |    |
|                 | 6            | 1       | 36.5     | 7.62  | 250.73              | 247.53   | 33.90    | 54.21    | 0.89     | 0.02                 | 29.40                | 1.22                 | 9.11                 | 2.52     | 3.31E+06                        | 1076.03                | NA              | NA                      | NA                                     | NA                                    | 25.2682            | 0.1940               | 16.4689         | NA           |         |    |
|                 |              | 2       | 36       | 7.56  | 249.16              | 247.09   | 38.44    | 56.77    | 0.89     | 0.02                 | 29.53                | 0.89                 | 11.20                | 2.60     | 2.69E+06                        | 99.94                  | NA              | NA                      | NA                                     | NA                                    | 11.3531            | 0.1198               | 9.0429          | NA           |         |    |
|                 |              | 3       | 36       | 7.53  | 253.54              | 246.59   | 31.98    | 54.62    | 0.89     | 0.02                 | 29.99                | 0.99                 | 7.36                 | 2.58     | 3.66E+06                        | 189.06                 | NA              | NA                      | NA                                     | NA                                    | 11.9447            | 0.2124               | 12.5653         | NA           |         |    |
|                 |              | AV      | 36.17    | 7.57  | 251.14              | 247.07   | 34.77    | 55.20    | 0.89     | 0.02                 | 29.64                | 1.03                 | 9.22                 | 2.57     | 3.22E+06                        | 455.01                 | 8.65            | 40.7812                 | 9.49E-06                               | 5.55E-01                              | 16.1887            | 0.1754               | 12.6924         | NA           |         |    |
|                 |              | SD      | 0.29     | 0.05  | 2.22                | 0.47     | 3.31     | 1.38     | 0.00     | 0.00                 | 0.31                 | 0.17                 | 1.92                 | 0.04     | 4.94E+05                        | 539.66                 | NA              | NA                      | 6.01E-09                               | 2.25E-04                              | 7.8687             | 0.0490               | 3.7146          | NA           |         |    |

Abbreviations: average (AV), bact. prod. (bacterial production), hexadecane (hexadec.), limit of detection (LOD), naphthalene (naphth.), not analyzed (NA), oxidation (ox.), phenanthrene (phenanth.), standard deviation (SD).

\*: excitation/emission matrix spectra (EEMS); #: gas chromatography-mass spectrometry (GC-MS)

**Table S2: Correlation of oligotype abundances with experimental parameters.**

| Taxa                  | Type | Oligotypes                       | Salinity | pH    | O <sub>2</sub> | DOC   | TDN   | TDP   | NO <sub>2</sub> | NO <sub>3</sub> | PO <sub>4</sub> | NH <sub>4</sub> | DIC  |
|-----------------------|------|----------------------------------|----------|-------|----------------|-------|-------|-------|-----------------|-----------------|-----------------|-----------------|------|
| <i>Colwellia</i>      | 1    | TGCTTTGATGCAC                    | NA       | NA    | NA             | 0.36  | NA    | NA    | 0.41            | NA              | NA              | 0.37            | NA   |
|                       | 2    | TTATTTGATGCAC                    | NA       | NA    | NA             | 0.38  | NA    | NA    | NA              | NA              | NA              | 0.30            | NA   |
|                       | 3    | CATTTTGATGCAC                    | NA       | -0.29 | NA             | 0.44  | -0.33 | -0.56 | NA              | -0.34           | -0.46           | 0.40            | NA   |
|                       | 4    | TTGTTTGATGCAC                    | NA       | NA    | NA             | 0.45  | NA    | NA    | NA              | NA              | NA              | NA              | NA   |
|                       | 5    | TGCTTTAATGCAC                    | NA       | NA    | NA             | 0.37  | NA    | NA    | NA              | NA              | NA              | NA              | NA   |
|                       | 6    | CGTTTTGATGCAC                    | NA       | NA    | NA             | 0.37  | NA    | -0.33 | 0.43            | NA              | NA              | 0.33            | NA   |
|                       | 7    | TTATTTAATGCAC                    | NA       | NA    | NA             | 0.41  | NA    | NA    | NA              | NA              | NA              | 0.37            | NA   |
|                       | 8    | CATTTTAATGCAC                    | NA       | -0.32 | NA             | 0.44  | -0.34 | -0.59 | NA              | -0.35           | -0.49           | 0.42            | NA   |
|                       | 9    | TGCTTTAATGACT                    | NA       | NA    | NA             | NA    | NA    | NA    | NA              | NA              | NA              | NA              | NA   |
|                       | 10   | CATTTTGATGACC                    | NA       | NA    | NA             | 0.31  | NA    | -0.49 | NA              | NA              | -0.56           | NA              | NA   |
|                       | 11   | TTGTTTAATGCAC                    | NA       | NA    | NA             | 0.49  | NA    | NA    | NA              | NA              | NA              | NA              | NA   |
|                       | 12   | TTGTTTGATGACC                    | NA       | NA    | NA             | 0.49  | NA    | -0.29 | NA              | NA              | NA              | NA              | NA   |
|                       | 13   | TGCTTTAATGACA                    | NA       | 0.30  | -0.32          | NA    | NA    | 0.38  | NA              | NA              | NA              | -0.53           | 0.31 |
|                       | 14   | TGCTTTGCTGCAC                    | NA       | NA    | NA             | 0.38  | NA    | NA    | 0.46            | NA              | NA              | 0.31            | NA   |
|                       | 15   | TTATGTGATGCAC                    | NA       | NA    | NA             | 0.44  | NA    | NA    | 0.35            | NA              | NA              | 0.38            | NA   |
|                       | 16   | TGCTTTAATGACC                    | NA       | NA    | NA             | NA    | NA    | NA    | NA              | NA              | NA              | NA              | NA   |
|                       | 17   | TTGTGTGATGCAC                    | NA       | NA    | NA             | 0.32  | NA    | NA    | NA              | NA              | NA              | NA              | NA   |
|                       | 18   | TTAGTTGATGCAC                    | NA       | NA    | NA             | 0.42  | NA    | NA    | NA              | NA              | NA              | 0.40            | NA   |
|                       | 19   | TTATTTGCTGCAC                    | NA       | NA    | NA             | 0.44  | NA    | NA    | 0.34            | NA              | NA              | 0.38            | NA   |
|                       | 20   | CATTTTGCTGCAC                    | NA       | NA    | NA             | 0.40  | -0.36 | -0.50 | 0.38            | -0.39           | -0.40           | 0.35            | NA   |
|                       | 21   | CGTTTTAATGCAC                    | NA       | NA    | NA             | 0.44  | NA    | NA    | 0.43            | NA              | NA              | NA              | NA   |
|                       | 22   | TTGTTTGCTGCAC                    | NA       | NA    | NA             | 0.43  | NA    | NA    | NA              | NA              | NA              | NA              | NA   |
|                       | 23   | TTGGTTGATGCAC                    | NA       | NA    | NA             | 0.50  | NA    | NA    | NA              | NA              | NA              | NA              | NA   |
|                       | 24   | TTATTTGGATGCAC                   | NA       | NA    | NA             | 0.46  | NA    | NA    | 0.35            | NA              | NA              | 0.37            | NA   |
| <i>Cycloclasticus</i> | 1    | AATTTGCGCAGGATCGGAAAAATAAAT-CGCA | NA       | NA    | NA             | NA    | 0.35  | NA    | -0.46           | 0.41            | NA              | NA              | NA   |
|                       | 2    | AATTTGCGCAGGATCGGAAAAATAAAT-CGCA | NA       | NA    | -0.34          | NA    | 0.32  | NA    | -0.48           | 0.40            | NA              | NA              | NA   |
|                       | 3    | ATTTTCGTAGGATCGGAAAAATAAAT-CGCA  | NA       | NA    | NA             | -0.30 | NA    | NA    | NA              | NA              | NA              | -0.28           | NA   |
|                       | 4    | AATTTGCGCAGGATAGGAAAAATAAAT-CGCA | NA       | NA    | -0.36          | NA    | 0.32  | NA    | -0.54           | 0.40            | NA              | NA              | NA   |
|                       | 5    | AATTTGCGCAGGATCGGAAAAATAAAT-CGCA | NA       | NA    | -0.38          | NA    | 0.30  | NA    | -0.54           | 0.38            | NA              | NA              | NA   |
|                       | 6    | AATTTGCGCAGGATCGGAAAAATAAAT-CGCA | NA       | NA    | -0.39          | NA    | 0.31  | NA    | -0.47           | 0.39            | NA              | NA              | NA   |
|                       | 7    | AATCTGCGCAGGATCGGAAAAATAAAT-CGCA | NA       | NA    | -0.42          | NA    | 0.30  | NA    | -0.44           | 0.41            | NA              | NA              | NA   |
|                       | 8    | AATTTGCGCGGATCGGAAAAATAAAT-CGCA  | NA       | NA    | -0.38          | NA    | 0.32  | NA    | -0.50           | 0.41            | NA              | NA              | NA   |
|                       | 9    | AATTTGCGCAGGATCGGAAAAATAAAT-CGCA | NA       | NA    | -0.37          | NA    | 0.33  | NA    | -0.55           | 0.43            | NA              | NA              | NA   |
|                       | 10   | AATTTGCGCAGGATCGGAAAAATAAAT-CGCA | NA       | NA    | -0.43          | NA    | 0.31  | NA    | -0.52           | 0.42            | NA              | NA              | NA   |
|                       | 11   | AATTTGCGCAGGATCGGAAAAATAAAT-CGCA | NA       | NA    | -0.34          | NA    | NA    | NA    | -0.46           | 0.37            | NA              | NA              | NA   |
|                       | 12   | AATTTGCGCAGGATCGGAAAAATAAAT-CGTA | NA       | NA    | -0.35          | NA    | NA    | NA    | NA              | NA              | NA              | NA              | NA   |
|                       | 13   | AATTTGCGCAGGATCGGAAAAATAAAT-CGCA | NA       | NA    | -0.37          | NA    | 0.31  | NA    | -0.43           | 0.40            | NA              | NA              | NA   |
|                       | 14   | AATTTGCGCAGGATCGGAAAAATAAAT-CGCA | NA       | NA    | -0.43          | NA    | 0.34  | NA    | -0.53           | 0.42            | NA              | NA              | NA   |
|                       | 15   | AATTTGCGCAGGATCGGAAAAATAAAT-CGCA | NA       | NA    | -0.34          | NA    | 0.31  | NA    | -0.55           | 0.41            | NA              | NA              | NA   |
|                       | 16   | AGTTTTCGCGGATCGGAAAAATAAAT-CGCA  | NA       | NA    | -0.39          | NA    | 0.31  | NA    | -0.53           | 0.40            | NA              | NA              | NA   |
|                       | 17   | AATTTGCGCAGGATCGGAAAAATAAAT-CGCA | NA       | NA    | -0.39          | NA    | NA    | NA    | -0.49           | 0.36            | NA              | NA              | NA   |
|                       | 18   | AATTTGCGCAGGATCGGAAAAATAAAT-CGCA | NA       | NA    | -0.38          | NA    | 0.30  | NA    | -0.55           | 0.41            | NA              | NA              | NA   |
|                       | 19   | AATTTGCGCAGGATCGGAAAAATAAAT-CGCA | NA       | NA    | -0.36          | NA    | 0.32  | NA    | -0.49           | 0.42            | NA              | NA              | NA   |
|                       | 20   | AATTTGCGCAGGATCGGAAAAATAAAT-CGCA | NA       | NA    | -0.37          | NA    | 0.31  | NA    | -0.50           | 0.38            | NA              | NA              | NA   |
|                       | 21   | AATTTGCGCAGGATCGGAAAAATAAAT-CGCA | NA       | NA    | -0.33          | NA    | NA    | NA    | -0.44           | 0.37            | NA              | NA              | NA   |
|                       | 22   | AATTTGCGCAGGATCGGAAAAATAAAT-CGCA | NA       | NA    | -0.41          | NA    | 0.33  | NA    | -0.50           | 0.39            | NA              | NA              | NA   |
|                       | 23   | AATTTGCGCAGGATCGGAAAAATAAAT-CGCA | NA       | NA    | -0.45          | NA    | NA    | NA    | -0.43           | 0.37            | NA              | NA              | NA   |
|                       | 24   | AATTTGCGCAGGATCGGAAAAATAAAT-CGCA | NA       | NA    | -0.41          | NA    | 0.29  | NA    | -0.50           | 0.38            | NA              | NA              | NA   |
|                       | 25   | AATTTGCGCAGGATCGGAAAAATAAAT-CGCA | NA       | NA    | -0.37          | NA    | NA    | NA    | -0.52           | 0.38            | NA              | NA              | NA   |
|                       | 26   | GATTTGCGCAGGATCGGAAAAATAAAT-CGCA | NA       | NA    | -0.39          | NA    | 0.32  | NA    | -0.57           | 0.42            | NA              | NA              | NA   |
|                       | 27   | AATTTGCGCAGGATCGGAAAAATAAAT-CGCA | NA       | NA    | -0.38          | NA    | 0.29  | NA    | -0.52           | 0.37            | NA              | NA              | NA   |
|                       | 28   | AATTTGCGCAGGATCGGAAAAATAAAT-CGCG | NA       | NA    | -0.39          | NA    | NA    | NA    | -0.39           | 0.35            | NA              | NA              | NA   |
|                       | 29   | AATTTGCGCAGGATCGGAAAAATAAAT-CGCA | NA       | NA    | -0.30          | NA    | 0.29  | NA    | -0.52           | 0.38            | NA              | NA              | NA   |
|                       | 30   | AATTTGCGCAGGATCGGAAAAATAAAT-TATA | NA       | NA    | -0.31          | NA    | NA    | NA    | -0.47           | NA              | -0.30           | NA              | NA   |
|                       | 31   | AATTTGCGCAGGATCGGAAAAATAAAT-CGCA | NA       | NA    | -0.41          | NA    | 0.33  | NA    | -0.53           | 0.42            | NA              | NA              | NA   |

Table continued on next page

Table S2 (continued)

| Taxa                  | Type | Cell counts | Bact. Prod. | Naphth. (EMS) | Hexadec. (GC-MS) | n-Alkanes (GC-MS) | Phenanth. (GC-MS) | Petroleum (GC-MS) | Hexadec. Ox | Naphth. Ox | Total DOSS | Total EHSS | Peptidase | Glucosidase | Lipase | TEP  |
|-----------------------|------|-------------|-------------|---------------|------------------|-------------------|-------------------|-------------------|-------------|------------|------------|------------|-----------|-------------|--------|------|
| <i>Colwellia</i>      | 1    | 0.36        | 0.48        | NA            | -0.57            | -0.53             | -0.64             | NA                | NA          | NA         | NA         | NA         | 0.45      | 0.34        | 0.34   | NA   |
|                       | 2    | NA          | NA          | -0.40         | -0.43            | -0.41             | -0.62             | NA                | NA          | NA         | -0.47      | NA         | NA        | NA          | NA     | NA   |
|                       | 3    | 0.60        | 0.67        | NA            | -0.46            | -0.42             | -0.40             | NA                | NA          | 0.35       | NA         | NA         | 0.62      | 0.52        | 0.60   | 0.68 |
|                       | 4    | NA          | 0.35        | -0.44         | -0.50            | -0.49             | -0.68             | -0.40             | NA          | NA         | NA         | NA         | 0.34      | NA          | NA     | NA   |
|                       | 5    | 0.40        | 0.51        | NA            | -0.62            | -0.60             | -0.67             | NA                | NA          | NA         | NA         | NA         | 0.48      | 0.34        | 0.37   | NA   |
|                       | 6    | 0.41        | 0.47        | NA            | -0.41            | -0.39             | -0.47             | NA                | NA          | NA         | NA         | NA         | 0.46      | 0.30        | 0.37   | NA   |
|                       | 7    | NA          | NA          | -0.39         | -0.49            | -0.43             | -0.65             | NA                | NA          | NA         | -0.47      | NA         | NA        | NA          | NA     | NA   |
|                       | 8    | 0.63        | 0.68        | NA            | -0.43            | NA                | NA                | NA                | NA          | 0.34       | NA         | NA         | 0.64      | 0.52        | 0.61   | 0.63 |
|                       | 9    | NA          | NA          | NA            | 0.43             | NA                | 0.40              | NA                | NA          | -0.47      | 0.62       | -0.48      | NA        | NA          | NA     | NA   |
|                       | 10   | 0.48        | 0.52        | NA            | NA               | NA                | NA                | 0.41              | NA          | NA         | NA         | NA         | 0.38      | 0.53        | 0.50   | NA   |
|                       | 11   | NA          | 0.33        | -0.46         | -0.52            | -0.51             | -0.69             | -0.42             | NA          | NA         | NA         | NA         | 0.35      | 0.30        | NA     | NA   |
|                       | 12   | 0.46        | 0.37        | NA            | -0.63            | -0.57             | -0.58             | NA                | NA          | NA         | NA         | NA         | 0.53      | 0.45        | 0.47   | NA   |
|                       | 13   | -0.33       | -0.37       | -0.52         | 0.54             | 0.46              | NA                | -0.49             | -0.43       | -0.43      | 0.64       | -0.46      | -0.42     | NA          | -0.37  | NA   |
|                       | 14   | 0.36        | 0.46        | NA            | -0.61            | -0.61             | -0.70             | NA                | NA          | NA         | -0.38      | NA         | 0.45      | NA          | 0.36   | NA   |
|                       | 15   | NA          | 0.28        | -0.43         | -0.56            | -0.51             | -0.72             | -0.41             | NA          | NA         | -0.49      | 0.38       | 0.29      | NA          | NA     | NA   |
|                       | 16   | NA          | NA          | NA            | NA               | NA                | NA                | NA                | -0.43       | -0.50      | 0.42       | -0.45      | NA        | NA          | NA     | NA   |
|                       | 17   | NA          | 0.40        | NA            | -0.53            | -0.49             | -0.55             | NA                | NA          | NA         | NA         | NA         | 0.35      | NA          | NA     | NA   |
|                       | 18   | NA          | 0.36        | NA            | -0.56            | -0.51             | -0.70             | NA                | NA          | NA         | -0.46      | NA         | 0.35      | NA          | NA     | NA   |
|                       | 19   | NA          | 0.35        | NA            | -0.55            | -0.50             | -0.69             | NA                | NA          | 0.32       | -0.47      | NA         | 0.33      | NA          | NA     | NA   |
|                       | 20   | 0.58        | 0.70        | NA            | -0.40            | NA                | NA                | NA                | NA          | 0.33       | NA         | NA         | 0.61      | 0.49        | 0.59   | 0.65 |
|                       | 21   | NA          | 0.33        | NA            | NA               | NA                | -0.41             | NA                | NA          | NA         | NA         | NA         | 0.29      | NA          | NA     | NA   |
|                       | 22   | 0.33        | 0.38        | NA            | -0.47            | -0.47             | -0.63             | NA                | NA          | NA         | NA         | NA         | 0.38      | NA          | NA     | NA   |
|                       | 23   | 0.30        | 0.33        | -0.51         | -0.56            | -0.54             | -0.73             | -0.46             | NA          | NA         | NA         | NA         | 0.33      | NA          | NA     | NA   |
|                       | 24   | NA          | 0.37        | NA            | -0.55            | -0.50             | -0.68             | NA                | NA          | 0.33       | -0.42      | NA         | 0.34      | NA          | NA     | NA   |
| <i>Cycloclasticus</i> | 1    | -0.39       | -0.29       | NA            | 0.58             | 0.60              | 0.47              | NA                | NA          | NA         | NA         | NA         | -0.53     | -0.31       | -0.43  | NA   |
|                       | 2    | -0.41       | -0.31       | NA            | 0.72             | 0.72              | 0.56              | NA                | 0.34        | 0.30       | NA         | NA         | -0.57     | -0.32       | -0.43  | NA   |
|                       | 3    | -0.31       | NA          | NA            | 0.58             | 0.49              | 0.58              | NA                | 0.31        | NA         | NA         | NA         | -0.41     | NA          | -0.30  | NA   |
|                       | 4    | -0.38       | -0.31       | NA            | 0.74             | 0.73              | 0.58              | NA                | 0.36        | 0.30       | NA         | NA         | -0.57     | -0.31       | -0.41  | NA   |
|                       | 5    | -0.36       | NA          | NA            | 0.71             | 0.71              | 0.55              | NA                | 0.38        | 0.33       | NA         | NA         | -0.54     | NA          | -0.38  | NA   |
|                       | 6    | -0.37       | -0.30       | NA            | 0.73             | 0.70              | 0.56              | NA                | 0.37        | 0.31       | NA         | NA         | -0.55     | NA          | -0.39  | NA   |
|                       | 7    | -0.41       | -0.30       | NA            | 0.79             | 0.81              | 0.65              | NA                | 0.36        | 0.30       | NA         | NA         | -0.60     | NA          | -0.41  | NA   |
|                       | 8    | -0.39       | -0.29       | NA            | 0.68             | 0.72              | 0.54              | NA                | 0.32        | 0.29       | NA         | NA         | -0.57     | -0.31       | -0.43  | NA   |
|                       | 9    | -0.39       | -0.29       | NA            | 0.69             | 0.72              | 0.54              | NA                | 0.32        | 0.30       | NA         | NA         | -0.58     | -0.30       | -0.42  | NA   |
|                       | 10   | -0.40       | -0.31       | NA            | 0.76             | 0.77              | 0.59              | NA                | 0.34        | 0.30       | NA         | NA         | -0.60     | NA          | -0.41  | NA   |
|                       | 11   | -0.41       | -0.30       | NA            | 0.66             | 0.65              | 0.50              | NA                | 0.34        | 0.32       | NA         | NA         | -0.55     | NA          | -0.41  | NA   |
|                       | 12   | NA          | NA          | NA            | 0.48             | 0.49              | NA                | NA                | 0.56        | 0.54       | -0.40      | 0.45       | -0.31     | NA          | NA     | 0.54 |
|                       | 13   | -0.41       | -0.29       | NA            | 0.65             | 0.66              | 0.46              | NA                | 0.32        | 0.32       | NA         | NA         | -0.58     | -0.31       | -0.44  | NA   |
|                       | 14   | -0.41       | -0.31       | NA            | 0.70             | 0.69              | 0.50              | NA                | 0.36        | 0.34       | NA         | 0.40       | -0.59     | -0.34       | -0.43  | NA   |
|                       | 15   | -0.37       | NA          | NA            | 0.73             | 0.74              | 0.60              | NA                | 0.30        | NA         | NA         | NA         | -0.55     | NA          | -0.40  | NA   |
|                       | 16   | -0.41       | -0.30       | NA            | 0.74             | 0.72              | 0.55              | NA                | 0.32        | NA         | NA         | NA         | -0.59     | NA          | -0.42  | NA   |
|                       | 17   | -0.32       | NA          | NA            | 0.63             | 0.64              | 0.46              | NA                | 0.35        | 0.36       | NA         | NA         | -0.52     | NA          | -0.36  | NA   |
|                       | 18   | -0.40       | -0.30       | NA            | 0.74             | 0.73              | 0.54              | NA                | 0.34        | 0.32       | NA         | NA         | -0.58     | -0.32       | -0.40  | NA   |
|                       | 19   | -0.39       | -0.29       | NA            | 0.67             | 0.70              | 0.53              | NA                | 0.34        | 0.32       | NA         | NA         | -0.54     | NA          | -0.41  | NA   |
|                       | 20   | -0.40       | NA          | NA            | 0.68             | 0.70              | 0.52              | NA                | 0.31        | 0.31       | NA         | NA         | -0.56     | -0.30       | -0.42  | NA   |
|                       | 21   | -0.41       | -0.30       | NA            | 0.75             | 0.76              | 0.60              | NA                | 0.35        | NA         | NA         | NA         | -0.57     | NA          | -0.41  | NA   |
|                       | 22   | -0.41       | -0.34       | NA            | 0.67             | 0.69              | 0.51              | NA                | 0.29        | NA         | NA         | NA         | -0.60     | -0.31       | -0.42  | NA   |
|                       | 23   | -0.35       | NA          | NA            | 0.62             | 0.66              | 0.49              | NA                | 0.33        | 0.34       | NA         | NA         | -0.52     | NA          | -0.34  | NA   |
|                       | 24   | -0.39       | NA          | NA            | 0.67             | 0.67              | 0.52              | NA                | 0.36        | 0.33       | NA         | NA         | -0.58     | -0.29       | -0.41  | NA   |
|                       | 25   | -0.34       | NA          | NA            | 0.67             | 0.70              | 0.54              | NA                | 0.34        | 0.33       | NA         | NA         | -0.52     | NA          | -0.36  | NA   |
|                       | 26   | -0.37       | NA          | NA            | 0.71             | 0.73              | 0.56              | NA                | 0.36        | 0.33       | NA         | NA         | -0.55     | NA          | -0.39  | NA   |
|                       | 27   | -0.33       | NA          | NA            | 0.64             | 0.66              | 0.53              | NA                | 0.37        | 0.31       | NA         | NA         | -0.51     | NA          | -0.35  | NA   |
|                       | 28   | -0.34       | NA          | NA            | 0.58             | 0.58              | 0.40              | NA                | 0.34        | 0.34       | NA         | NA         | -0.49     | NA          | -0.35  | NA   |
|                       | 29   | -0.35       | -0.29       | NA            | 0.67             | 0.67              | 0.57              | NA                | 0.33        | NA         | NA         | NA         | -0.50     | NA          | -0.35  | NA   |
|                       | 30   | NA          | NA          | NA            | 0.57             | 0.54              | 0.43              | NA                | 0.44        | 0.44       | NA         | NA         | -0.36     | NA          | NA     | NA   |
|                       | 31   | -0.37       | NA          | NA            | 0.69             | 0.70              | 0.52              | NA                | 0.33        | 0.32       | NA         | NA         | -0.55     | NA          | -0.37  | NA   |

Table continued on next page

Table S2 (continued)

| Taxa                     | Type               | Oligotypes                     | Salinity | pH    | O <sub>2</sub> | DOC   | TDN   | TDP   | NO <sub>2</sub> | NO <sub>3</sub> | PO <sub>4</sub> | NH <sub>4</sub> | DIC |
|--------------------------|--------------------|--------------------------------|----------|-------|----------------|-------|-------|-------|-----------------|-----------------|-----------------|-----------------|-----|
| <i>Oceaniserpentilla</i> | 1                  | ACGTTTTACTACGGAATCAAAGTTTATCC  | NA       | 0.30  | -0.28          | NA    | 0.51  | 0.42  | -0.48           | 0.56            | NA              | -0.35           | NA  |
|                          | 2                  | ACGTCTTTACTACGGAATCAAAGTTTATCC | NA       | NA    | -0.37          | NA    | 0.52  | 0.46  | -0.49           | 0.57            | NA              | -0.41           | NA  |
|                          | 3                  | ACGTTTTACTACGGAATCAGAGTTTATCC  | NA       | NA    | -0.31          | NA    | 0.50  | 0.44  | -0.49           | 0.54            | NA              | -0.38           | NA  |
|                          | 4                  | ACGTTTTACTAAAGAATTAAGTTTATCC   | NA       | NA    | -0.43          | NA    | 0.47  | 0.36  | -0.60           | 0.55            | NA              | -0.45           | NA  |
|                          | 5                  | ACGTTTTACTACGGAATCAACGTTTATCC  | NA       | NA    | -0.34          | NA    | 0.54  | 0.46  | -0.52           | 0.58            | NA              | -0.37           | NA  |
|                          | 6                  | ACGTTTTACTACAAAATAAGTTTATCC    | NA       | NA    | -0.37          | NA    | 0.56  | 0.49  | -0.53           | 0.60            | 0.30            | -0.37           | NA  |
|                          | 7                  | ACGTTTTACTACGGAATCAAAGTTTATCC  | NA       | NA    | -0.36          | NA    | 0.46  | 0.44  | -0.43           | 0.53            | NA              | -0.39           | NA  |
|                          | 8                  | ACGTTTTACTACGGAATCAAAGTTTATCC  | NA       | 0.28  | -0.43          | NA    | 0.54  | 0.50  | -0.52           | 0.60            | NA              | -0.44           | NA  |
|                          | 9                  | ACGTTTTACTACGGAATCAAAGTTTATCC  | NA       | NA    | -0.35          | NA    | 0.49  | 0.48  | -0.45           | 0.54            | NA              | -0.42           | NA  |
|                          | 10                 | ACGTTTTACTACGGAATCGAAGTTTATCC  | NA       | NA    | -0.39          | NA    | 0.52  | 0.47  | -0.43           | 0.56            | NA              | -0.45           | NA  |
|                          | 11                 | ACGTTTTACTACGGAATCAAAGTTTATCC  | NA       | NA    | -0.36          | NA    | 0.52  | 0.45  | -0.47           | 0.57            | NA              | -0.39           | NA  |
|                          | 12                 | ACGTTTTACTACGGAATCAAAGTTTATCC  | NA       | NA    | -0.36          | NA    | 0.49  | 0.44  | -0.44           | 0.54            | NA              | -0.40           | NA  |
|                          | 13                 | ACGTTTTACTAAGGAATCAAAGTTTATCC  | NA       | NA    | -0.36          | NA    | NA    | 0.29  | -0.42           | 0.37            | NA              | -0.51           | NA  |
|                          | 14                 | ACGTTTTACTACGGAGTCAAAGTTTATCC  | NA       | NA    | -0.37          | NA    | 0.48  | 0.42  | -0.54           | 0.54            | NA              | -0.41           | NA  |
|                          | 15                 | ACGTTTTACTACGGACCAAAGTTTATCC   | NA       | 0.31  | -0.37          | NA    | 0.55  | 0.53  | -0.46           | 0.59            | 0.33            | -0.39           | NA  |
|                          | 16                 | ACGTTTTACTACGGAATCAAAGTTTATCC  | NA       | NA    | -0.36          | NA    | 0.51  | 0.46  | -0.43           | 0.57            | NA              | -0.41           | NA  |
|                          | 17                 | ACGTTCTACTACGGAATCAAAGTTTATCC  | NA       | NA    | -0.39          | NA    | 0.52  | 0.40  | -0.59           | 0.59            | NA              | -0.40           | NA  |
|                          | 18                 | ACGTTTTACTACGGAATCAAAGTTTATCC  | NA       | NA    | -0.36          | NA    | 0.46  | 0.46  | -0.41           | 0.51            | NA              | -0.45           | NA  |
|                          | 19                 | GCGTTTTACTACGGAATCAAAGTTTATCC  | NA       | NA    | -0.31          | -0.31 | 0.44  | 0.46  | -0.50           | 0.47            | NA              | -0.39           | NA  |
|                          | 20                 | ACGTTTTACTACGGAATCAAAGTTTATCC  | NA       | NA    | -0.32          | NA    | 0.46  | 0.43  | -0.45           | 0.51            | NA              | -0.40           | NA  |
|                          | 21                 | ACGTTCTACTACGGAATCAAAGTTTATCC  | NA       | NA    | -0.38          | NA    | 0.50  | 0.42  | -0.57           | 0.56            | NA              | -0.39           | NA  |
|                          | 22                 | AGATTTTTACTACGGAATCAAAGTTTATCC | NA       | NA    | -0.34          | NA    | 0.39  | 0.30  | -0.55           | 0.46            | NA              | -0.35           | NA  |
|                          | 23                 | ACGCCTTACTACGGAATCAAAGTTTATCC  | NA       | 0.28  | -0.41          | NA    | 0.52  | 0.49  | -0.48           | 0.56            | 0.30            | -0.44           | NA  |
|                          | 24                 | ACGTTTTGCTACGGAATCAAAGTTTATCC  | NA       | NA    | -0.39          | NA    | 0.48  | 0.44  | -0.50           | 0.54            | NA              | -0.42           | NA  |
|                          | 25                 | ACGTTTTACTACGGAATCAAAGTTTATCC  | NA       | NA    | -0.36          | NA    | 0.49  | 0.43  | -0.47           | 0.54            | NA              | -0.40           | NA  |
|                          | 26                 | ACGTTTTACTACGGAATCAAAGTTTATCC  | NA       | 0.29  | -0.36          | NA    | 0.47  | 0.47  | -0.48           | 0.54            | NA              | -0.43           | NA  |
|                          | 27                 | ACGTTTCTACTACGGAATCAAAGTTTATCC | NA       | NA    | -0.36          | NA    | 0.49  | 0.42  | -0.49           | 0.55            | NA              | -0.38           | NA  |
|                          | 28                 | ACGTTTTACTACGGAATCAAAGTTTATCC  | NA       | NA    | NA             | -0.38 | 0.45  | 0.46  | -0.50           | 0.46            | 0.29            | -0.37           | NA  |
|                          | 29                 | ACGTTTTACTACGGATCAAAGTTTATCC   | NA       | NA    | -0.35          | NA    | 0.49  | 0.42  | -0.40           | 0.52            | NA              | -0.35           | NA  |
|                          | 30                 | AGGTTTTACTACGGAATCAAAGTTTATCC  | NA       | NA    | -0.36          | NA    | 0.52  | 0.36  | -0.45           | 0.60            | NA              | -0.31           | NA  |
| <i>Marinobacter</i>      | 1                  | TACTCTAATAATTCGTA              | NA       | -0.40 | NA             | NA    | NA    | -0.43 | NA              | NA              | -0.31           | 0.29            | NA  |
|                          | 2                  | CACTCTAATAATTCGTA              | NA       | -0.43 | NA             | NA    | NA    | -0.41 | NA              | NA              | -0.29           | NA              | NA  |
|                          | 3                  | TACTCTGATAATTCGTA              | NA       | -0.42 | NA             | NA    | NA    | -0.42 | NA              | -0.28           | -0.31           | NA              | NA  |
|                          | 4                  | TACTCTAATAATTCGTA              | NA       | -0.31 | NA             | NA    | NA    | -0.40 | NA              | NA              | -0.32           | NA              | NA  |
|                          | 5                  | TACTCTAATAATTCGTA              | NA       | NA    | NA             | NA    | NA    | NA    | NA              | NA              | NA              | NA              | NA  |
|                          | 6                  | CACTCTAATAATTCGTA              | NA       | -0.46 | NA             | NA    | -0.28 | -0.41 | NA              | -0.36           | -0.29           | NA              | NA  |
|                          | 7                  | TACTCTAATAATTCGTA              | NA       | -0.55 | NA             | NA    | -0.33 | -0.44 | NA              | -0.31           | -0.37           | NA              | NA  |
|                          | 8                  | TACTCTAATAATTCGTA              | NA       | -0.36 | NA             | NA    | NA    | -0.43 | NA              | NA              | -0.39           | NA              | NA  |
|                          | 9                  | TACTATAACTATACGTA              | NA       | NA    | NA             | NA    | NA    | -0.32 | NA              | NA              | NA              | NA              | NA  |
|                          | 10                 | TACTCTAATAATTCGTA              | NA       | -0.44 | NA             | NA    | NA    | -0.34 | NA              | NA              | NA              | NA              | NA  |
|                          | 11                 | TACTCTAATAATTCGTA              | NA       | -0.40 | NA             | NA    | -0.28 | -0.41 | NA              | -0.33           | -0.32           | NA              | NA  |
|                          | 12                 | TGCCATAACTATACGTA              | NA       | 0.30  | NA             | NA    | 0.48  | 0.53  | NA              | 0.48            | 0.36            | -0.37           | NA  |
|                          | 13                 | TATTCTAATAATTCGTA              | NA       | -0.42 | NA             | NA    | NA    | -0.41 | NA              | NA              | -0.31           | NA              | NA  |
|                          | 14                 | TACTCTAAGAATTCGTA              | NA       | -0.42 | 0.32           | NA    | -0.38 | -0.42 | NA              | -0.38           | -0.29           | NA              | NA  |
| 15                       | TACTCTAATAATTCGTA  | NA                             | -0.48    | NA    | NA             | -0.31 | -0.47 | NA    | -0.31           | -0.37           | NA              | NA              |     |
| 16                       | TACCCTAATAATTCGTA  | NA                             | -0.39    | NA    | NA             | NA    | -0.42 | NA    | NA              | -0.37           | NA              | NA              |     |
| 17                       | TACTCTAATAATTCGTA  | NA                             | -0.31    | NA    | NA             | NA    | -0.40 | NA    | NA              | -0.28           | NA              | NA              |     |
| 18                       | TGCTCTAATAATTCGTA  | NA                             | -0.49    | NA    | NA             | -0.37 | -0.35 | NA    | -0.38           | -0.33           | NA              | NA              |     |
| 19                       | TACTCTAATAATTCGTA  | NA                             | -0.42    | NA    | NA             | NA    | -0.35 | NA    | NA              | NA              | NA              | NA              |     |
| 20                       | TACTCTAATAATTCGTA  | NA                             | -0.51    | NA    | NA             | -0.30 | -0.47 | NA    | -0.32           | -0.37           | NA              | NA              |     |
| 21                       | TACTCTAATAATTCGTA  | NA                             | -0.47    | NA    | NA             | -0.40 | -0.52 | NA    | -0.39           | -0.48           | NA              | NA              |     |
| 22                       | TACTCTAATAATTCGTA  | NA                             | -0.44    | NA    | NA             | NA    | -0.38 | NA    | NA              | NA              | NA              | NA              |     |
| 23                       | TGCTACAACAATTCGTA  | NA                             | NA       | NA    | -0.34          | 0.53  | 0.35  | -0.56 | 0.52            | NA              | NA              | NA              |     |
| 24                       | TGCCATAACTGATACGTA | NA                             | NA       | -0.34 | NA             | 0.41  | 0.42  | -0.46 | 0.45            | NA              | -0.39           | NA              |     |

Table continued on next page



Table S2 (continued)

| Taxa                     | Type | Cell counts | Bact. Prod. | Naphth. (EEMS) | Hexadec. (GC-MS) | n-Alkanes (GC-MS) | Phenanth. (GC-MS) | Petroleum (GC-MS) | Hexadec. Ox | Naphth. Ox | Total DOSS | Total EHSS | Peptidase | Glucosidase | Lipase | TEP   |
|--------------------------|------|-------------|-------------|----------------|------------------|-------------------|-------------------|-------------------|-------------|------------|------------|------------|-----------|-------------|--------|-------|
| <i>Oceaniserpentilla</i> | 1    | -0.63       | -0.63       | NA             | 0.69             | 0.65              | NA                | NA                | NA          | NA         | NA         | NA         | -0.73     | -0.44       | -0.69  | -0.60 |
|                          | 2    | -0.67       | -0.66       | NA             | 0.71             | 0.67              | 0.41              | NA                | NA          | NA         | NA         | NA         | -0.78     | -0.48       | -0.70  | -0.61 |
|                          | 3    | -0.65       | -0.67       | NA             | 0.74             | 0.69              | 0.43              | NA                | NA          | NA         | NA         | NA         | -0.76     | -0.46       | -0.69  | -0.60 |
|                          | 4    | -0.62       | -0.58       | NA             | 0.81             | 0.80              | 0.56              | NA                | NA          | NA         | NA         | NA         | -0.75     | -0.40       | -0.61  | NA    |
|                          | 5    | -0.66       | -0.66       | NA             | 0.69             | 0.66              | 0.39              | NA                | NA          | NA         | NA         | NA         | -0.78     | -0.50       | -0.71  | -0.66 |
|                          | 6    | -0.70       | -0.71       | NA             | 0.69             | 0.63              | NA                | NA                | NA          | NA         | NA         | NA         | -0.80     | -0.50       | -0.73  | -0.63 |
|                          | 7    | -0.63       | -0.64       | NA             | 0.74             | 0.69              | 0.41              | NA                | NA          | NA         | NA         | NA         | -0.77     | -0.44       | -0.67  | -0.54 |
|                          | 8    | -0.70       | -0.70       | NA             | 0.73             | 0.69              | 0.43              | NA                | NA          | -0.29      | NA         | NA         | -0.80     | -0.51       | -0.71  | -0.65 |
|                          | 9    | -0.66       | -0.65       | NA             | 0.75             | 0.71              | 0.45              | NA                | NA          | NA         | NA         | NA         | -0.78     | -0.48       | -0.69  | -0.62 |
|                          | 10   | -0.68       | -0.69       | NA             | 0.76             | 0.74              | 0.46              | NA                | NA          | -0.30      | NA         | NA         | -0.78     | -0.44       | -0.69  | -0.59 |
|                          | 11   | -0.66       | -0.66       | NA             | 0.72             | 0.70              | 0.42              | NA                | NA          | NA         | NA         | NA         | -0.78     | -0.48       | -0.70  | -0.60 |
|                          | 12   | -0.65       | -0.63       | NA             | 0.77             | 0.69              | 0.45              | NA                | NA          | NA         | NA         | NA         | -0.77     | -0.46       | -0.69  | -0.64 |
|                          | 13   | -0.48       | -0.48       | NA             | 0.83             | 0.81              | 0.65              | NA                | NA          | NA         | 0.46       | NA         | -0.64     | NA          | -0.46  | NA    |
|                          | 14   | -0.61       | -0.63       | NA             | 0.78             | 0.75              | 0.50              | NA                | NA          | NA         | NA         | NA         | -0.76     | -0.43       | -0.66  | -0.54 |
|                          | 15   | -0.72       | -0.70       | NA             | 0.68             | 0.65              | NA                | -0.38             | NA          | NA         | NA         | NA         | -0.82     | -0.55       | -0.76  | -0.66 |
|                          | 16   | -0.67       | -0.67       | NA             | 0.69             | 0.67              | NA                | NA                | NA          | NA         | NA         | NA         | -0.80     | -0.49       | -0.70  | -0.59 |
|                          | 17   | -0.65       | -0.66       | NA             | 0.75             | 0.72              | 0.46              | NA                | NA          | NA         | NA         | NA         | -0.81     | -0.48       | -0.68  | -0.55 |
|                          | 18   | -0.62       | -0.64       | NA             | 0.68             | 0.65              | 0.39              | NA                | NA          | NA         | NA         | NA         | -0.76     | -0.45       | -0.66  | -0.55 |
|                          | 19   | -0.63       | -0.65       | NA             | 0.79             | 0.73              | 0.54              | NA                | NA          | NA         | NA         | NA         | -0.74     | -0.48       | -0.68  | -0.64 |
|                          | 20   | -0.62       | -0.65       | NA             | 0.65             | 0.62              | 0.39              | NA                | NA          | NA         | NA         | NA         | -0.74     | -0.48       | -0.65  | -0.55 |
|                          | 21   | -0.66       | -0.65       | NA             | 0.74             | 0.70              | 0.45              | NA                | NA          | NA         | NA         | NA         | -0.79     | -0.49       | -0.68  | -0.58 |
|                          | 22   | -0.52       | -0.55       | NA             | 0.81             | 0.77              | 0.56              | NA                | NA          | NA         | NA         | NA         | -0.71     | -0.41       | -0.56  | NA    |
|                          | 23   | -0.70       | -0.69       | NA             | 0.72             | 0.68              | 0.42              | NA                | NA          | NA         | NA         | NA         | -0.80     | -0.50       | -0.72  | -0.67 |
|                          | 24   | -0.66       | -0.65       | NA             | 0.72             | 0.68              | 0.40              | NA                | NA          | NA         | NA         | NA         | -0.79     | -0.47       | -0.69  | -0.59 |
|                          | 25   | -0.65       | -0.63       | NA             | 0.80             | 0.76              | 0.49              | NA                | NA          | NA         | NA         | NA         | -0.78     | -0.47       | -0.68  | -0.63 |
|                          | 26   | -0.64       | -0.69       | NA             | 0.74             | 0.67              | 0.44              | NA                | NA          | -0.32      | NA         | NA         | -0.78     | -0.45       | -0.70  | -0.59 |
|                          | 27   | -0.64       | -0.66       | NA             | 0.79             | 0.75              | 0.48              | NA                | NA          | NA         | NA         | NA         | -0.77     | -0.45       | -0.68  | -0.58 |
|                          | 28   | -0.62       | -0.57       | NA             | 0.77             | 0.74              | 0.52              | NA                | NA          | NA         | NA         | NA         | -0.73     | -0.50       | -0.70  | -0.65 |
|                          | 29   | -0.62       | -0.64       | NA             | 0.77             | 0.72              | 0.48              | NA                | NA          | NA         | NA         | NA         | -0.75     | -0.43       | -0.66  | -0.57 |
|                          | 30   | -0.62       | -0.66       | NA             | 0.76             | 0.73              | 0.42              | NA                | NA          | NA         | NA         | NA         | -0.78     | -0.44       | -0.69  | -0.50 |
| <i>Marinobacter</i>      | 1    | 0.39        | 0.41        | 0.60           | NA               | NA                | NA                | 0.57              | 0.29        | NA         | NA         | NA         | 0.37      | NA          | 0.31   | 0.69  |
|                          | 2    | 0.38        | 0.39        | 0.60           | NA               | NA                | NA                | 0.58              | 0.31        | NA         | -0.38      | NA         | 0.34      | NA          | 0.31   | 0.71  |
|                          | 3    | 0.38        | 0.39        | 0.65           | NA               | NA                | NA                | 0.63              | 0.34        | NA         | NA         | NA         | 0.33      | NA          | 0.32   | 0.77  |
|                          | 4    | 0.35        | 0.39        | 0.63           | NA               | NA                | NA                | 0.62              | 0.37        | NA         | NA         | NA         | 0.30      | 0.31        | 0.32   | 0.74  |
|                          | 5    | NA          | NA          | NA             | NA               | NA                | NA                | NA                | 0.45        | 0.32       | NA         | NA         | NA        | NA          | NA     | NA    |
|                          | 6    | 0.42        | 0.46        | 0.61           | NA               | NA                | NA                | 0.59              | NA          | NA         | NA         | NA         | 0.42      | 0.29        | 0.38   | 0.67  |
|                          | 7    | 0.41        | 0.37        | 0.60           | NA               | NA                | NA                | 0.58              | 0.33        | NA         | NA         | NA         | 0.38      | 0.33        | 0.38   | 0.78  |
|                          | 8    | 0.32        | 0.39        | 0.73           | NA               | NA                | 0.43              | 0.71              | 0.44        | 0.32       | NA         | NA         | NA        | NA          | 0.30   | 0.81  |
|                          | 9    | NA          | NA          | NA             | NA               | NA                | NA                | 0.38              | NA          | NA         | NA         | NA         | NA        | NA          | NA     | 0.74  |
|                          | 10   | 0.38        | 0.41        | 0.61           | NA               | NA                | NA                | 0.61              | NA          | NA         | NA         | NA         | 0.35      | NA          | 0.32   | 0.70  |
|                          | 11   | 0.40        | 0.46        | 0.59           | NA               | NA                | NA                | 0.57              | 0.33        | NA         | NA         | NA         | 0.35      | NA          | 0.38   | 0.68  |
|                          | 12   | -0.67       | -0.66       | NA             | 0.53             | 0.51              | NA                | NA                | -0.30       | -0.38      | 0.39       | NA         | -0.64     | -0.41       | -0.65  | -0.75 |
|                          | 13   | 0.36        | 0.33        | 0.56           | NA               | NA                | NA                | 0.53              | 0.32        | NA         | NA         | NA         | 0.30      | 0.30        | 0.33   | 0.74  |
|                          | 14   | 0.47        | 0.43        | 0.58           | NA               | NA                | NA                | 0.59              | 0.29        | NA         | NA         | NA         | 0.49      | 0.36        | 0.47   | 0.75  |
|                          | 15   | 0.46        | 0.42        | 0.55           | NA               | NA                | NA                | 0.53              | 0.38        | NA         | NA         | NA         | 0.42      | 0.34        | 0.41   | 0.84  |
|                          | 16   | 0.34        | 0.43        | 0.65           | NA               | NA                | NA                | 0.62              | 0.34        | NA         | NA         | NA         | 0.31      | NA          | 0.35   | 0.60  |
|                          | 17   | 0.34        | 0.43        | 0.66           | NA               | NA                | NA                | 0.65              | 0.39        | NA         | NA         | NA         | 0.32      | NA          | 0.30   | 0.73  |
|                          | 18   | 0.43        | 0.40        | 0.65           | NA               | NA                | NA                | 0.66              | NA          | NA         | NA         | NA         | 0.39      | NA          | 0.41   | 0.80  |
|                          | 19   | 0.31        | 0.32        | 0.58           | NA               | NA                | NA                | 0.57              | 0.37        | NA         | -0.41      | NA         | NA        | NA          | NA     | 0.75  |
|                          | 20   | 0.45        | 0.43        | 0.62           | NA               | NA                | NA                | 0.62              | 0.41        | NA         | NA         | NA         | 0.37      | NA          | 0.40   | 0.80  |
|                          | 21   | 0.54        | 0.50        | 0.60           | NA               | NA                | NA                | 0.60              | 0.42        | 0.32       | NA         | NA         | 0.39      | NA          | 0.52   | 0.80  |
|                          | 22   | 0.33        | 0.32        | 0.60           | NA               | NA                | NA                | 0.60              | 0.37        | NA         | -0.44      | NA         | NA        | NA          | NA     | 0.71  |
|                          | 23   | -0.56       | -0.55       | NA             | 0.62             | 0.54              | 0.41              | NA                | NA          | NA         | NA         | NA         | -0.64     | -0.42       | -0.61  | -0.58 |
|                          | 24   | -0.57       | -0.59       | NA             | 0.53             | 0.50              | NA                | NA                | NA          | -0.30      | NA         | NA         | -0.63     | -0.39       | -0.55  | NA    |

Abbreviations: Bact. prod. (bacterial production), bis-2-(ethylhexyl)sulfosuccinate (DOSS), ethylhexylsulfosuccinate (EHSS), excitation/emission matrix spectra (EEMS), gas chromatography-mass spectrometry (GC-MS), hexadecane (hexadec.), naphthalene (naphth.), not analyzed (NA), oxidation (ox.), phenanthrene (phenanth.)

**Table S3: Procedure, treatment and storage of samples for the microcosms simulating DWH spill-like plumes (abiotic control, biotic control, WAF, dispersant-only, CEWAF, CEWAF+nutrients) monitored for 6 weeks. Numbers indicate biological replicates analyzed, respectively.**

| Analysis                    | Sample (ml) | Procedure                                                                                                                              | Preservation      | Storage |
|-----------------------------|-------------|----------------------------------------------------------------------------------------------------------------------------------------|-------------------|---------|
| DIC                         | 5           | Transferred sample into a stoppered and crimped 10.8 ml helium-purged headspace vial containing 1 NaOH pellet                          | NaOH              | RT      |
| NH <sub>4</sub>             | 5           | Transferred sample into a sterile 15 ml tube containing 100 µl phenol                                                                  | Phenol            | 4°C     |
| DOC and nutrients           | 45          | Filtered sample through 0.22 µm-sterivex filter into clean plastic bottle                                                              | NA                | -20°C   |
| Cell counts                 | 9           | Transferred sample into a sterile 20 ml plastic scint vial containing 1 ml of 37% formaldehyde                                         | 3.7% formaldehyde | -20°C   |
| DNA                         | 500         | Filtered sample through 0.22 µm-sterivex filter and frozen sample immediately                                                          | NA                | -80°C   |
| DOSS and EHSS               | 7.5         | Transferred sample into a sterile 15 ml tube containing 2.5 ml isopropanol                                                             | 25% isopropanol   | -20°C   |
| DOSS and EHSS rinsate       | NA          | After sampling was completed, microcosm bottles were rinsed with 20 ml methanol and rinsate collected in sterile 50 ml centrifuge vial | Methanol          | -20°C   |
| Hydrocarbons                | 500         | Filtered sample through 0.7 µm-filter into clean glass bottles, kept at 4°C for a few hours and then extracted                         | NA                | 4°C     |
| DOM                         | 200         | Filtered sample through 0.7 µm-filter into clean glass bottles, kept at -20°C for a few days and then extracted                        | NA                | -20°C   |
| Bacterial Production        | 10          | Transferred sample into a sterile 50 ml tube and stored over night until analysis                                                      | NA                | 8°C     |
| Hexadecane oxidation rates  | 30          | Transferred sample into a sterile 50 ml tube and stored over night                                                                     | NA                | 8°C     |
| Naphthalene oxidation rates | 30          | Transferred sample into a sterile 50 ml tube and stored over night                                                                     | NA                | 8°C     |
| Enzyme activity             | 30          | Transferred sample into a sterile 50 ml tube and stored over night                                                                     | NA                | 8°C     |
| TEP                         | 500         | Transferred sample into a clean plastic bottle                                                                                         | 3.7% formaldehyde | 4°C     |

**Table S4: Sampling strategy for the microcosms simulating DWH spill-like plumes (abiotic control, biotic control, dispersant-only, CEWAF, oil-only, CEWAF+nutrients) monitored for 6 weeks. Numbers indicate biological replicates analyzed, respectively.**

| Treatment       | Time (weeks) | Salinity | pH | O <sub>2</sub> (μM) | DOC (μM) | TD (μM) | TDP (μM) | NO <sub>2</sub> (μM) | NO <sub>3</sub> (μM) | PO <sub>4</sub> (μM) | NH <sub>4</sub> (μM) | DIC (mM) | Cell counts (ml <sup>-1</sup> ) | Bact. Prod. (nM C/day) |
|-----------------|--------------|----------|----|---------------------|----------|---------|----------|----------------------|----------------------|----------------------|----------------------|----------|---------------------------------|------------------------|
| Abiotic Control | 0            | 3        | 3  | 3                   | 3        | 3       | 3        | 3                    | 3                    | 3                    | 3                    | 3        | 3                               | 3                      |
|                 | 1            | NA       | 3  | 3                   | 3        | 3       | 3        | 3                    | 3                    | 3                    | 3                    | 3        | 3                               | 3                      |
|                 | 2.5          | NA       | 3  | 3                   | 3        | 3       | 3        | 3                    | 3                    | 3                    | 3                    | 3        | 3                               | 3                      |
|                 | 4            | NA       | 3  | 3                   | 3        | 3       | 3        | 3                    | 3                    | 3                    | 3                    | 3        | 3                               | 3                      |
|                 | 6            | 3        | 3  | 3                   | 3        | 3       | 3        | 3                    | 3                    | 3                    | 3                    | 3        | 3                               | 3                      |
| Biotic Control  | 0            | 3        | 3  | 3                   | 3        | 3       | 3        | 3                    | 3                    | 3                    | 3                    | 3        | 3                               | 3                      |
|                 | 1            | NA       | 3  | 3                   | 3        | 3       | 3        | 3                    | 3                    | 3                    | 3                    | 3        | 3                               | 3                      |
|                 | 2.5          | NA       | 3  | 3                   | 3        | 3       | 3        | 3                    | 3                    | 3                    | 3                    | 3        | 3                               | 3                      |
|                 | 4            | NA       | 3  | 3                   | 3        | 3       | 3        | 3                    | 3                    | 3                    | 3                    | 3        | 3                               | 3                      |
|                 | 6            | 3        | 3  | 3                   | 3        | 3       | 3        | 3                    | 3                    | 3                    | 3                    | 3        | 3                               | 3                      |
| Oil             | 0            | 3        | 3  | 3                   | 3        | 3       | 3        | 3                    | 3                    | 3                    | 3                    | 3        | 3                               | 3                      |
|                 | 1            | NA       | 3  | 3                   | 3        | 3       | 3        | 3                    | 3                    | 3                    | 3                    | 3        | 3                               | 3                      |
|                 | 2.5          | NA       | 3  | 3                   | 3        | 3       | 3        | 3                    | 3                    | 3                    | 3                    | 3        | 3                               | 3                      |
|                 | 4            | NA       | 3  | 3                   | 3        | 3       | 3        | 3                    | 3                    | 3                    | 3                    | 3        | 3                               | 3                      |
|                 | 6            | 3        | 3  | 3                   | 3        | 3       | 3        | 3                    | 3                    | 3                    | 3                    | 3        | 3                               | 3                      |
| Dispersants     | 0            | 3        | 3  | 3                   | 3        | 3       | 3        | 3                    | 3                    | 3                    | 3                    | 3        | 3                               | 3                      |
|                 | 1            | NA       | 3  | 3                   | 3        | 3       | 3        | 3                    | 3                    | 3                    | 3                    | 3        | 3                               | 3                      |
|                 | 2.5          | NA       | 3  | 3                   | 3        | 3       | 3        | 3                    | 3                    | 3                    | 3                    | 3        | 3                               | 3                      |
|                 | 4            | NA       | 3  | 3                   | 3        | 3       | 3        | 3                    | 3                    | 3                    | 3                    | 3        | 3                               | 3                      |
|                 | 6            | 3        | 3  | 3                   | 3        | 3       | 3        | 3                    | 3                    | 3                    | 3                    | 3        | 3                               | 3                      |
| CEWAF           | 0            | 3        | 3  | 3                   | 3        | 3       | 3        | 3                    | 3                    | 3                    | 3                    | 3        | 3                               | 3                      |
|                 | 1            | NA       | 3  | 3                   | 3        | 3       | 3        | 3                    | 3                    | 3                    | 3                    | 3        | 3                               | 3                      |
|                 | 2.5          | NA       | 3  | 3                   | 3        | 3       | 3        | 3                    | 3                    | 3                    | 3                    | 3        | 3                               | 3                      |
|                 | 4            | NA       | 3  | 3                   | 3        | 3       | 3        | 3                    | 3                    | 3                    | 3                    | 3        | 3                               | 3                      |
|                 | 6            | 3        | 3  | 3                   | 3        | 3       | 3        | 3                    | 3                    | 3                    | 3                    | 3        | 3                               | 3                      |
| CEWAF+nutrients | 0            | 3        | 3  | 3                   | 3        | 3       | 3        | 3                    | 3                    | 3                    | 3                    | 3        | 3                               | 3                      |
|                 | 1            | NA       | 3  | 3                   | 3        | 3       | 3        | 3                    | 3                    | 3                    | 3                    | 3        | 3                               | 3                      |
|                 | 2.5          | NA       | NA | NA                  | NA       | NA      | NA       | NA                   | NA                   | NA                   | 1                    | NA       | 1                               | 1                      |
|                 | 4            | NA       | NA | NA                  | NA       | NA      | NA       | NA                   | NA                   | NA                   | 1                    | NA       | 1                               | 1                      |
|                 | 6            | 3        | 3  | 3                   | 3        | 3       | 3        | 3                    | 3                    | 3                    | 3                    | 3        | 3                               | 3                      |

Table continued on next page

**Table S4 (continued)**

| Treat-<br>ment  | Time<br>(weeks) | EEMS data     |                   | GC-MS data         |                              |                   |                     |                              | <sup>14</sup> C Hexadec.<br>rate<br>(nM/day) | <sup>14</sup> C Naphth.<br>rate<br>(nM/day) |
|-----------------|-----------------|---------------|-------------------|--------------------|------------------------------|-------------------|---------------------|------------------------------|----------------------------------------------|---------------------------------------------|
|                 |                 | Oil<br>(µg/L) | Naphth.<br>(µg/L) | Hexadec.<br>(µg/L) | Total<br>n-Alkanes<br>(µg/L) | Naphth.<br>(µg/L) | Phenanth.<br>(µg/L) | Total<br>Petroleum<br>(µg/L) |                                              |                                             |
| Abiotic Control | 0               | <LOD          | <LOD              | <LOD               | <LOD                         | <LOD              | <LOD                | <LOD                         | 3                                            | 3                                           |
|                 | 1               | <LOD          | <LOD              | <LOD               | <LOD                         | <LOD              | <LOD                | <LOD                         | 3                                            | 3                                           |
|                 | 2.5             | <LOD          | <LOD              | <LOD               | <LOD                         | <LOD              | <LOD                | <LOD                         | 3                                            | 3                                           |
|                 | 4               | <LOD          | <LOD              | <LOD               | <LOD                         | <LOD              | <LOD                | <LOD                         | 3                                            | 3                                           |
|                 | 6               | <LOD          | <LOD              | <LOD               | <LOD                         | <LOD              | <LOD                | <LOD                         | 3                                            | 3                                           |
| Biotic Control  | 0               | <LOD          | <LOD              | <LOD               | <LOD                         | <LOD              | <LOD                | <LOD                         | 3                                            | 3                                           |
|                 | 1               | NA            | NA                | <LOD               | <LOD                         | <LOD              | <LOD                | <LOD                         | 3                                            | 3                                           |
|                 | 2.5             | NA            | NA                | <LOD               | <LOD                         | <LOD              | <LOD                | <LOD                         | 3                                            | 3                                           |
|                 | 4               | NA            | NA                | <LOD               | <LOD                         | <LOD              | <LOD                | <LOD                         | 3                                            | 3                                           |
|                 | 6               | <LOD          | <LOD              | <LOD               | <LOD                         | <LOD              | <LOD                | <LOD                         | 3                                            | 3                                           |
| Oil             | 0               | 1             | 1                 | 1                  | 1                            | 1                 | 1                   | 1                            | 3                                            | 3                                           |
|                 | 1               | 1             | 1                 | 1                  | 1                            | 1                 | 1                   | 1                            | 3                                            | 3                                           |
|                 | 2.5             | 1             | 1                 | 1                  | 1                            | 1                 | 1                   | 1                            | 3                                            | 3                                           |
|                 | 4               | 1             | 1                 | 1                  | 1                            | 1                 | 1                   | 1                            | 3                                            | 3                                           |
|                 | 6               | 1             | 1                 | 1                  | 1                            | 1                 | 1                   | 1                            | 3                                            | 3                                           |
| Dispersants     | 0               | 1             | 1                 | <LOD               | <LOD                         | <LOD              | <LOD                | <LOD                         | 3                                            | 3                                           |
|                 | 1               | 1             | 1                 | <LOD               | <LOD                         | <LOD              | <LOD                | <LOD                         | 3                                            | 3                                           |
|                 | 2.5             | 1             | 1                 | <LOD               | <LOD                         | <LOD              | <LOD                | <LOD                         | 3                                            | 3                                           |
|                 | 4               | 1             | 1                 | <LOD               | <LOD                         | <LOD              | <LOD                | <LOD                         | 3                                            | 3                                           |
|                 | 6               | 1             | 1                 | <LOD               | <LOD                         | <LOD              | <LOD                | <LOD                         | 3                                            | 3                                           |
| CEWAF           | 0               | 1             | 1                 | 1                  | 1                            | 1                 | 1                   | 1                            | 3                                            | 3                                           |
|                 | 1               | 1             | 1                 | 1                  | 1                            | 1                 | 1                   | 1                            | 3                                            | 3                                           |
|                 | 2.5             | 1             | 1                 | 1                  | 1                            | 1                 | 1                   | 1                            | 3                                            | 3                                           |
|                 | 4               | 1             | 1                 | 1                  | 1                            | 1                 | 1                   | 1                            | 3                                            | 3                                           |
|                 | 6               | 1             | 1                 | 1                  | 1                            | 1                 | 1                   | 1                            | 3                                            | 3                                           |
| CEWAF+nutrients | 0               | 1             | 1                 | 1                  | 1                            | 1                 | 1                   | 1                            | 3                                            | 3                                           |
|                 | 1               | 1             | 1                 | 1                  | 1                            | 1                 | 1                   | 1                            | 3                                            | 3                                           |
|                 | 2.5             | NA            | NA                | NA                 | NA                           | NA                | NA                  | NA                           | 1                                            | 1                                           |
|                 | 4               | NA            | NA                | NA                 | NA                           | NA                | NA                  | NA                           | 1                                            | 1                                           |
|                 | 6               | 1             | 1                 | 1                  | 1                            | 1                 | 1                   | 1                            | 3                                            | 3                                           |

Table continued on next page

**Table S4 (continued)**

| Treatment       | Time (weeks) | Dispersants     |                 |                             | Hydrolysis rates   |                      |                 | TEP (Gxeq/L) |
|-----------------|--------------|-----------------|-----------------|-----------------------------|--------------------|----------------------|-----------------|--------------|
|                 |              | Total DOSS (nM) | Total EHSS (nM) | Total T80, T85 and S80 (nM) | Peptidase (nM/day) | Glucosidase (nM/day) | Lipase (nM/day) |              |
| Abiotic Control | 0            | NA              | NA              | NA                          | 3                  | 3                    | 3               | 3            |
|                 | 1            | NA              | NA              | NA                          | 3                  | 3                    | 3               | NA           |
|                 | 2.5          | NA              | NA              | NA                          | 3                  | 3                    | 3               | NA           |
|                 | 4            | NA              | NA              | NA                          | 3                  | 3                    | 3               | NA           |
|                 | 6            | NA              | NA              | NA                          | 3                  | 3                    | 3               | 3            |
| Biotic Control  | 0            | NA              | NA              | NA                          | 3                  | 3                    | 3               | 3            |
|                 | 1            | NA              | NA              | NA                          | 3                  | 3                    | 3               | NA           |
|                 | 2.5          | NA              | NA              | NA                          | 3                  | 3                    | 3               | NA           |
|                 | 4            | NA              | NA              | NA                          | 3                  | 3                    | 3               | NA           |
|                 | 6            | NA              | NA              | NA                          | 3                  | 3                    | 3               | 3            |
| Oil             | 0            | NA              | NA              | NA                          | 3                  | 3                    | 3               | 3            |
|                 | 1            | NA              | NA              | NA                          | 3                  | 3                    | 3               | 3            |
|                 | 2.5          | NA              | NA              | NA                          | 3                  | 3                    | 3               | 3            |
|                 | 4            | NA              | NA              | NA                          | 3                  | 3                    | 3               | 3            |
|                 | 6            | NA              | NA              | NA                          | 3                  | 3                    | 3               | 3            |
| Dispersants     | 0            | 3               | 3               | 3                           | 3                  | 3                    | 3               | NA           |
|                 | 1            | 3               | 3               | 3                           | 3                  | 3                    | 3               | NA           |
|                 | 2.5          | 3               | 3               | 3                           | 3                  | 3                    | 3               | NA           |
|                 | 4            | 3               | 3               | 3                           | 3                  | 3                    | 3               | NA           |
|                 | 6            | 3               | 3               | 3                           | 3                  | 3                    | 3               | NA           |
| CEWAF           | 0            | 3               | 3               | 3                           | 3                  | 3                    | 3               | NA           |
|                 | 1            | 3               | 3               | 3                           | 3                  | 3                    | 3               | NA           |
|                 | 2.5          | 3               | 3               | 3                           | 3                  | 3                    | 3               | NA           |
|                 | 4            | 3               | 3               | 3                           | 3                  | 3                    | 3               | NA           |
|                 | 6            | 3               | 3               | 3                           | 3                  | 3                    | 3               | NA           |
| CEWAF+nutrients | 0            | 3               | 3               | 3                           | 3                  | 3                    | 3               | NA           |
|                 | 1            | 3               | 3               | 3                           | 3                  | 3                    | 3               | NA           |
|                 | 2.5          | NA              | NA              | NA                          | 1                  | 1                    | 1               | NA           |
|                 | 4            | NA              | NA              | NA                          | NA                 | NA                   | NA              | NA           |
|                 | 6            | 3               | 3               | 3                           | 3                  | 3                    | 3               | NA           |

Abbreviations: bacterial production (bact. prod.), EEMS (excitation/emission matrix spectra), gas chromatography-mass spectrometry (GC-MS), hexadecane (hexadec.), limit of detection (LOD), naphthalene (naphth.), not analyzed (NA), oxidation (ox.), phenanthrene (phenanth.).

**Table S5: CARD-FISH probes, formamide concentrations, and probe coverage.**

| Probe name | Specificity                                  | Formamide [%] | Sequence (5' to 3')     | Reference |
|------------|----------------------------------------------|---------------|-------------------------|-----------|
| ALT1413    | <i>Alteromonas, Colwellia</i>                | 40            | TTT GCA TCC CAC TCC CAT | (22)      |
| EUB338     | Most Bacteria                                | 35            | GCT GCC TCC CGT AGG AGT | (21)      |
| EUB338 II  | <i>Planctomycetales</i>                      | 35            | GCA GCC ACC CGT AGG TGT | (20)      |
| EUB338 III | <i>Verrucomicrobiales</i>                    | 35            | GCT GCC ACC CGT AGG TGT | (20)      |
| GAM42a     | <i>Gammaproteobacteria</i>                   | 35            | GCC TTC CCA CAT CGT TT  | (19)      |
| cBet42a    | Competitor against <i>Betaproteobacteria</i> | 35            | GCC TTC CCA CTT CGT TT  | (19)      |
